# Supplementary material for: What is the financial burden to patients of accessing surgical care in Sierra Leone? A cross-sectional survey of catastrophic and impoverishing expenditure
Source: PubMed Central journal article supplement (PMC7942261; doi:10.1136/bmjopen-2020-039049), 2021-03-08
Supplement: bmjopen-2020-039049.draft_revisions.pdf [file bmjopen-2020-039049.draft_revisions.pdf]

# BMJ Open

BMJ Open is committed to open peer review. As part of this commitment we make the peer review history of every article we publish publicly available.

When an article is published we post the peer reviewers' comments and the authors' responses online. We also post the versions of the paper that were used during peer review. These are the versions that the peer review comments apply to.

The versions of the paper that follow are the versions that were submitted during the peer review process. They are not the versions of record or the final published versions. They should not be cited or distributed as the published version of this manuscript.

BMJ Open is an open access journal and the full, final, typeset and author-corrected version of record of the manuscript is available on our site with no access controls, subscription charges or pay-per-view fees (<http://bmjopen.bmj.com>).

If you have any questions on BMJ Open's open peer review process please email [info.bmjopen@bmj.com](mailto:info.bmjopen@bmj.com)

# BMJ Open

## Catastrophic and impoverishing expenditure for surgical care in Sierra Leone

|                               |                                                                                                                                                                                                                                                                                                                                                                                                                                                                                                                                                                                                                                                               |
|-------------------------------|---------------------------------------------------------------------------------------------------------------------------------------------------------------------------------------------------------------------------------------------------------------------------------------------------------------------------------------------------------------------------------------------------------------------------------------------------------------------------------------------------------------------------------------------------------------------------------------------------------------------------------------------------------------|
| Journal:                      | <i>BMJ Open</i>                                                                                                                                                                                                                                                                                                                                                                                                                                                                                                                                                                                                                                               |
| Manuscript ID                 | bmjopen-2020-039049                                                                                                                                                                                                                                                                                                                                                                                                                                                                                                                                                                                                                                           |
| Article Type:                 | Original research                                                                                                                                                                                                                                                                                                                                                                                                                                                                                                                                                                                                                                             |
| Date Submitted by the Author: | 02-Apr-2020                                                                                                                                                                                                                                                                                                                                                                                                                                                                                                                                                                                                                                                   |
| Complete List of Authors:     | Phull, Manraj ; West Hertfordshire Hospitals NHS Trust<br>Grimes, Caris E.; King's College London Faculty of Life Sciences and Medicine; Medway NHS Foundation Trust<br>Kamara, Thaim; University of Sierra Leone College of Medicine and Allied Health Sciences, Surgery<br>Wurie, Haja ; University of Sierra Leone College of Medicine and Allied Health Sciences<br>Leather, Andy; King's College London Faculty of Life Sciences and Medicine, King's Centre for Global Health<br>Davies, Justine ; King's College London Faculty of Life Sciences and Medicine, Centre for Global Health; University of Birmingham Institute of Applied Health Research |
| Keywords:                     | SURGERY, HEALTH ECONOMICS, Health policy < HEALTH SERVICES ADMINISTRATION & MANAGEMENT                                                                                                                                                                                                                                                                                                                                                                                                                                                                                                                                                                        |
|                               |                                                                                                                                                                                                                                                                                                                                                                                                                                                                                                                                                                                                                                                               |

SCHOLARONE™  
Manuscripts

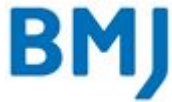

I, the Submitting Author has the right to grant and does grant on behalf of all authors of the Work (as defined in the below author licence), an exclusive licence and/or a non-exclusive licence for contributions from authors who are: i) UK Crown employees; ii) where BMJ has agreed a CC-BY licence shall apply, and/or iii) in accordance with the terms applicable for US Federal Government officers or employees acting as part of their official duties; on a worldwide, perpetual, irrevocable, royalty-free basis to BMJ Publishing Group Ltd ("BMJ") its licensees and where the relevant Journal is co-owned by BMJ to the co-owners of the Journal, to publish the Work in this journal and any other BMJ products and to exploit all rights, as set out in our [licence](#).

The Submitting Author accepts and understands that any supply made under these terms is made by BMJ to the Submitting Author unless you are acting as an employee on behalf of your employer or a postgraduate student of an affiliated institution which is paying any applicable article publishing charge ("APC") for Open Access articles. Where the Submitting Author wishes to make the Work available on an Open Access basis (and intends to pay the relevant APC), the terms of reuse of such Open Access shall be governed by a Creative Commons licence – details of these licences and which [Creative Commons](#) licence will apply to this Work are set out in our licence referred to above.

Other than as permitted in any relevant BMJ Author's Self Archiving Policies, I confirm this Work has not been accepted for publication elsewhere, is not being considered for publication elsewhere and does not duplicate material already published. I confirm all authors consent to publication of this Work and authorise the granting of this licence.

## Catastrophic and impoverishing expenditure for surgical care in Sierra Leone

Manraj Phull (1), Caris E Grimes (2, 3), Thaim B Kamara (4), Haja Wurie (5), Andrew JM Leather (2) \* and Justine Davies (2, 6, 7) \*

\*Co-senior authors

### Authors

Manraj Phull BSc MBBS MRCS MSc

1) West Hertfordshire Hospitals NHS Trust. Watford General Hospital, Watford, Hertfordshire, UK

Caris E Grimes BSc MBBS MEd FRCS MD

2) King's Centre for Global Health and Health Partnerships, School of Population Health and Environmental Sciences, King's College London, London, SE5 9RJ, UK

3) Medway NHS Foundation Trust, Gillingham, Kent, UK

Thaim B Kamara MBChB, FWACS

4) College of Medicine and Allied Health Sciences, Freetown, Sierra Leone

Haja Wurie

5) College of Medicine and Allied Health Sciences, Freetown, Sierra Leone

Andrew JM Leather MBBS, FRCS, MS

2) King's Centre for Global Health and Health Partnerships, School of Population Health and Environmental Sciences, King's College London, London, SE5 9RJ, UK

Justine Davies (Corresponding Author) MBChB, MD (res), MRCP

2) King's Centre for Global Health and Health Partnerships, School of Population Health and Environmental Sciences, King's College London, London, SE5 9RJ, UK

6) Institute for Applied Health Research, University of Birmingham, Edgbaston, Birmingham B15 2TT UK

7) Medical Research Council/Wits University Rural Public Health and Health Transitions Research Unit, Faculty of Health Sciences, School of Public Health, University of the Witwatersrand, Johannesburg, South Africa

Correspondence to Justine Davies: [J.Davies.6@bham.ac.uk](mailto:J.Davies.6@bham.ac.uk)

Author Contribution: JD, AL, TBK and HW conceptualised the study. MP, JD, and AL developed the protocol and survey tools; MP, JD, and CG analysed the data; all authors contributed to the interpretation of the results and write up of the manuscript; All authors approved the manuscript for publication.

Competing interests: None declared.

Funding: This research was partly funded by the National Institute of Health Research (NIHR) Global Health Research Unit on Health System Strengthening in Sub-Saharan Africa, King's College London (GHRU 16/136/54) using UK aid from the UK Government to support global health research. The views expressed in this publication are those of the author(s) and not necessarily those of the NIHR or the Department of Health and Social Care.

1  
2  
3  
4 Data Sharing: Further data is available on reasonable request from the corresponding author.  
5

6 Patient and Public Involvement / Cohort Description: The Lancet Commission on Global Surgery has  
7 shown that out of pocket expenditure limits patients ability to access surgical care when needed.  
8 Accessing care for a surgically treatable disease to reduce mortality or morbidity is a priority for  
9 patients. The methodology employed was standard for assessing out of pocket costs, wealth, and  
10 healthcare expenditure. Patients were not involved in designing these methods, however, they were  
11 involved in testing and refining them to ensure appropriateness to a local setting. No patients were  
12 involved in the recruitment to and conduct of the study.  
13  
14

15 As part of the ethics board approval, we did not collect contact details of the patients involved in this  
16 study and hence cannot disseminate the results to them. However, the results are being shared widely  
17 amongst policy workers, community leaders, and clinicians in Sierra Leone. The patient advocacy  
18 movement in Sierra Leone, like in many low income countries, is nascent, hence there are no patient  
19 groups with which to share results. We hope that our work will galvanise greater advocacy and enable  
20 sharing more widely.  
21  
22

23 We did not collect names of the six patients who helped to refine the data collection tool or ask their  
24 permission to be named. However, we have added a statement to the acknowledgements to  
25 generically acknowledge their contribution.  
26  
27

28 Acknowledgements: We thank the healthcare workers and patients who were involved in refining the  
29 data collection tool to ensure its applicability to a local setting.  
30  
31  
32  
33  
34  
35  
36  
37  
38  
39  
40  
41  
42  
43  
44  
45  
46  
47  
48  
49  
50  
51  
52  
53  
54  
55  
56  
57  
58  
59  
60

## Abstract

**Background:** Integral to providing Universal Health Coverage in lower- and middle-income countries (LMICs) is financial risk protection for the estimated 3.7 billion people facing financial catastrophe each year if they needed surgical care. To achieve this, a greater understanding of financial hardship on surgical patients is required. This study measured the financial burden associated with accessing surgical care in Sierra Leone.

**Methods:** A cross-sectional survey was conducted with patients at discharge from the main tertiary level hospital in Freetown. This captured demographics, yearly household expenditure, direct medical, direct non-medical, and indirect costs for surgical care, and summary household assets. Missing data were imputed. Rates of catastrophic expenditure (CE) (a cost > 10% of annual expenditure or >40% of capacity to pay), impoverishment (being pushed into, or further into, poverty as a result of surgical care costs), amount of OOP costs, and means used to meet these costs were derived.

**Results:** Of 335 patients interviewed, 39.4% were female and 80.3% were urban dwellers. Median yearly household expenditure was US\$3569. Mean out-of-pocket costs were US\$243, of which a mean of US\$24 (10%) was spent pre-hospital. Of costs incurred during the hospital admission, direct medical costs were US\$138 (63%) and US\$34 (16%) were direct non-medical costs. US\$46 (21%) were indirect costs. Catastrophic expenditure affected 10-18% of those interviewed, depending on definition. 45% of people were below the national poverty line prior to admission and 50% were pushed below or further into poverty following payment for surgical care. 83.7% of patients used household savings to meet OOP costs. Only 2% (6 patients) had health insurance.

### **Conclusion:**

Obtaining surgical care has substantial economic impacts on households which pushes them into poverty or further into poverty. The much-needed scaling up of surgical care needs to be accompanied by financial risk protection.

## Article Summary

### **Strengths and Limitations**

#### **Strengths:**

Rigorous methodology to provide in depth data on costs of accessing surgical care.

Well recognised methods to ascertain household expenditure.

Provides accurate estimates of OOP, catastrophic, and impoverishing expenditure calculated as well as sources of financing.

#### **Limitations**

Data captured in one hospital only, although that is the major surgical care centre for the country.

Only examines those who accessed care and doesn't allow exploration of costs as a limitation to accessing care.

## Introduction

An estimated 33 million individuals globally face financial catastrophe through payment for surgery and anaesthetic care each year. Furthermore 3-7 billion people have been estimated to be at risk of catastrophic expenditure (CE – defined as a total OOP health payment that exceeds a set threshold of the household's annual income or expenditure) due to a lack of financial risk protection (FRP).<sup>1,2</sup> Surgical conditions make up 30% of the global burden of disease and globally an additional 143 million surgical procedures are required annually to meet the current unmet surgical need.<sup>1,3</sup> To ensure universal health coverage, it is therefore essential that Financial Risk Protection (FRP) is prioritised alongside the scaling up of surgical care. The Lancet Commission on Global Surgery (LCoGS) stated a target of 100% financial protection by 2030 for people accessing surgical care, and FRP indicators for surgery are now included within the World Development Indicators (WDI).<sup>4</sup> Despite this, there is little information on financial implications of accessing surgery in the literature beyond modelled studies,<sup>1,2,5</sup> many of which have been based on few real-world data-points.

Worldwide modelled data on CE and impoverishing expenditure (IE – defined as being pushed into or further into poverty) related to surgical care reveals that those most affected are individuals in low- and middle-income countries (LMICs).<sup>1,2,6</sup> Modelling studies from Sierra Leone in West Africa, classed as “least developed” by the UN, and with a population of 7 million reflects these findings; between 84.7% and 49.9% of the population in Sierra Leone is estimated to be at risk of CE if they require surgery. Estimated average out-of-pocket (OOP) costs for major surgery in the country were US\$117.60, which put 73.3% to 59.2% of the population at risk of impoverishment.<sup>5,7</sup> However, there are no empirical data to validate these estimates. The estimated unmet surgical burden of disease in SL is huge, at 92%, as a result of the historical neglect of surgical care both nationally and globally.<sup>8-10</sup> SL has recently shown its commitment to improving access to surgical care by embarking on developing a national surgical, obstetric and anaesthesia plan (NSOAP) aimed at scaling up and strengthening surgical services.<sup>11</sup> To enable effective planning, an accurate understanding of the financial implications of accessing surgical services is required.

In Sierra Leone, as in many LMICs, payments for healthcare are upfront, complex, and not immediately apparent from hospital listed service charges. In addition, hospital listed charges – where they exist – may not reflect the total facility-incurred costs that patients pay during their hospitalisation. These include direct medical costs which are charges for the payment of medical care and direct non-medical costs which include items such as transport to the hospital and food. In addition, substantial costs of care may be incurred prior to the hospitalisation episode. For example, there may be direct medical costs at other healthcare facilities visited prior to the definitive admission. Finally, there are indirect costs (e.g. loss of wages whilst receiving care) that patients, and in some cases their caregivers, experience in their illness, which also impact upon ability to access care. Two ways of capturing these costs is the measurement of IE or CE. The two most widely used thresholds for CE are an expense of > 40% of non-subsistence expenditure (i.e. household expenditure net of subsistence costs, as a means of capturing the ability to pay) or > 10% of total annual expenditure.<sup>12-15</sup>

This study aimed to measure the financial burden associated with receiving surgical care in Sierra Leone by using an exit survey to determine a) direct medical, direct non-medical, and indirect OOP costs to pay for a surgical care episode b) the rate of impoverishment and catastrophic expenditure, c) the wealth characteristics of the population accessing surgical care relative to that of the general Sierra Leonean population, and d) the factors associated with higher costs of hospital care. Finally, the in-hospital payment mechanism (i.e. where and to whom the OOP payments are being made), how costs of accessing surgical care are met, and the factors associated with meeting costs of care were explored.

## Methods

### Setting

This study was done in the main tertiary referral centre in Sierra Leone, located in the central part of greater Freetown, and where the majority of surgical care in the countries' non charitable sector is done. It is a 400-bed hospital with 150 beds dedicated to surgical care. Surgical care is delivered in 5 of the 10 wards, an accident and emergency department with a trauma ward for short stay (< 24hrs) emergency surgical patients, an intensive care unit, five operating theatres and a surgical outpatient unit. The surgical department is run by 8 surgical and 2 anaesthetic consultants covering six specialities: general surgery, surgical oncology, urology, paediatrics, trauma and orthopaedics, and ENT. The average surgical volume is 80 -100 operations per month.<sup>11</sup>

### Participants

Participants were all surgical patients who consented to take part, receiving operative or non-operative surgical care under the care of the hospital surgical team and located on one of the surgical wards. Patients under the care of non-surgical teams; patients under the age of 16 who were without a parent, guardian, or head of the household; and participants unable to consent and/or unwilling to take part in the study were excluded. Participants were recruited consecutively to the study on admission for surgical care from June to August 2018.

### Data collection

A structured questionnaire was administered to patients and/or their relatives at the time of formal discharge from surgical care while patients were on the ward. Where patients self-discharged or left against medical advice, where possible they were interviewed when leaving the hospital. Interviews were conducted in a private space and all participants were encouraged to bring a relative, head of the household, or the main breadwinner to allow for expenditure and OOP costs to be captured accurately.

The questionnaire was designed based on tools used in similar studies done in LMIC settings.<sup>16-19</sup> It was co-designed with in-country experts, healthcare professionals, and researchers to ensure that the questions were suitable for the SL context. The questionnaire was pilot-tested for ease of comprehension, clarity of definitions, appropriateness of questions, and manageability of the length of the interview in six patients (who were excluded from the analysis). Minor modifications were made to the wording of the questions based on this, but the meaning of the questions was not changed. The questionnaire was designed and written in English and administered by trained Sierra Leonean research assistants (RAs) in either English or a chosen local dialect (most commonly Krio). Data was captured on paper and later transferred to electronic format.

### Definition and construction of variables

Data was collected on the age and gender of the participant, and their address (later used to calculate if they were resident in an urban or rural area). The occupation of the main breadwinner was recorded using both a free text answer stating the occupation, followed by a question on whether this was salaried (i.e. employed) or non-salaried (i.e. self-employed or working in the informal sector). Education was captured as the highest level of education of the main breadwinner using the following categories: no formal education, primary, secondary, college or university level, or other. Information on household expenditure was captured by asking 7 questions on regular items purchased in a typical week (food and drink etc.), 11 questions on larger expenditure items typically purchased monthly (toiletries, clothing, etc.) and a further 12 questions on typical yearly spend on big household items such as furniture and livestock. Total food expenditure ( $foodexp_h$ ) was summed as a separate variable for the purposes of calculating catastrophic expenditure (where food expenditure was used to define subsistence costs). Number of people living in the household ( $HHsize$ ) was also captured, as was the



number of days of sickness before presentation, whether care had been sought elsewhere prior to presentation at Connaught Hospital, and the mode of transport used.

Data was also collected on the following: whether the patient was an emergency or elective case; whether or not the participant was eligible for free healthcare (for patients under the age of 5 years old, pregnant or lactating mothers, Ebola survivors, destitute and disabled patients); and the primary diagnosis, recorded from review of the patient's admission notes, ward and theatre ledgers (later summarised into 10 categories of surgical conditions: trauma, hernia, abdominal conditions, peripheral vascular disease or diabetic foot disease, urological conditions, breast mass / cancer, burns, ENT / dental disease, thyroid, congenital abnormality, or paediatrics). Treatment was categorised as operative or non-operative following review of the patient's admission notes. Length of hospital stay was also calculated.

Direct medical OOP costs were captured across the entire illness episode including in-hospital costs (from the point of admission to discharge from the tertiary care hospital) and pre-hospital costs (for other medical costs related to the admission episode which occurred prior to the tertiary care admission). In-hospital direct medical costs were the sum of administrative costs (including registration, admission, triage, bed and discharge fees), medications, medical supplies, investigations, blood transfusion, operation cost, and informal payments (defined as any payment that was not part of hospital policy, such as doctors' fees, tips, payments made to porters and to nursing staff for nursing care). If costs were 'formal', we asked whether these costs were paid directly to the hospital bank / cashiers directly or via hospital staff, or to an external facility (such as external pharmacy or laboratory). For pre-hospital care, non-medical direct costs were calculated from transport costs. For the hospital episode, non-medical direct costs were captured as: cost of transport to the hospital or to and from the hospital to get food, medical supplies and investigations from external facilities, and the cost of food and accommodation during the hospital stay. Finally, indirect costs were captured by estimating lost wages during the illness episode.

All costs are presented in Le and \$US at the conversion rate of 15<sup>th</sup> July 2019 (1 Sierra Leonean Leone = 0.00011567 USD).

Total household expenditure ( $total_{exp_h}$ ) was calculated over the course of 12 months by summing all the variables collected on all regular household items purchased as described above.

$Total\ OOP\ payments\ for\ surgical\ care\ (OOP_t) = total\ direct\ medical\ costs + total\ direct\ non-medical\ costs + total\ indirect\ costs$

Catastrophic expenditure (CE) was defined as either an expense of more than 40% of non-subsistence expenditure (i.e. household expenditure net of subsistence [here, food ( $food_{exp_h}$ )] costs) or an expense more than 10% of total annual expenditure.

CE was therefore present if:  $\frac{OOP_t}{total_{exp_h} - food_{exp_h}} > 0.4$

Or if:  $\frac{OOP_t}{total_{exp_h}} > 0.1$

Impoverishing Expenditure (IE) is defined as being pushed into or further into poverty. The Sierra Leone national poverty line (spending < \$1.25/person /day) threshold was used for the main analysis. In addition, two further thresholds for poverty were used based on World Bank definitions: "poverty" - spending < \$3.10/person/day and "extreme poverty" - spending < \$1.90/person/day.<sup>4</sup> Presence of poverty before (baseline) and after OOP spending on surgical care were then calculated.

Baseline poverty ( $BLP_h$ ) at each threshold was determined to be present if total household expenditure ( $totalexp_h$ ) per individual inhabiting each household divided by the number of days in the year was

below the poverty threshold chosen. i.e.:  $\frac{\left(\frac{totalexp_h}{HHsize}\right)}{365} \leq \text{poverty line}$

Impoverishment as a result of surgical care was defined as present if the total household expenditure net the total OOP costs for surgical care ( $totalexp_{netsurg} = totalexp_h - OOP_t$ ) per head of household, per day was less than the chosen poverty threshold

i.e.: IE present if  $\frac{\left(\frac{totalexp_{netsurg}}{HHsize}\right)}{365} \leq \text{poverty line}$

Both CE and IE are presented as the number and percentage of participants who experienced CE and or IE.

Summary household asset data was collected using a yes or no response to the ownership of the following assets: Electricity / Light, Mobile phone, Radio, Television, Computer, Refrigerator, Generator, Bicycle, Motorcycle and Car or truck.

### Sample size and power calculation

Based on a similar study done in Uganda which estimated CE to be 31%<sup>16</sup> in a free healthcare setting, modelled and WB data for SL which estimates CE at 84.7% and 49.9% respectively, and from discussion with academics with in-country knowledge, we estimated that CE would be around 60% of patients admitted for surgical care. The sample size required to capture this with a CI of 55-65%, allowing for 10% loss to follow up was 442 patients.

### Statistical analysis

Statistical analysis was done using SPSS Version 25 for windows.

Characteristics of the population seeking care are described. Normally distributed data are presented as mean and standard deviation (SD), otherwise median and IQR are used. Multiple Imputation Chained Equations were used to compute missing data-points using predictive mean matching for variables with less than 20% missingness and where missingness was identified as not at random. Where imputed variables were used, the pooled mean is shown as standard SPSS output. A complete case analysis was done for variables describing how costs of accessing care were met and the consequences of accessing care.

Wealth characteristics (household asset ownership) of the population accessing surgical care were compared with those in the general population (2015 Census data<sup>20</sup>) using the Chi squared test.

Associations between direct medical in-hospital OOP costs of care and age, sex, type of admission (emergency or elective), operative or non-operative care, type of operative procedure, or length of stay were tested using a generalised linear model using a Tweedie function with a power of 1.9.

### Ethical approval

Ethical approval was granted by the Sierra Leone Ethics and Scientific Review Committee and from the King's College London Research Ethics Committee (ref. LRU-17/18-6455)

All patients gave written consent to participate where possible and witnessed thumbprints and verbal consent where patients were illiterate. Patients were given information about the study at admission

1  
2  
3 and consented between 4-24 hours later after due time was given to consider the study information.  
4 Consent was re-confirmed just prior to doing the exit interview.  
5

## 6 **Results**

7 Of the initial 416 recruited participants, a total of 335 were interviewed (Figure 1). Participant  
8 characteristics are presented in table 1. In summary, the mean age of the interviewed patients was 28  
9 (SD 20). 39.4% were female and 80.3% lived in an urban area. 29% were formally employed with a  
10 further 66.9% being employed but without a regular salary – either self-employed or employed within  
11 the informal sector. The level of education of the main breadwinner was secondary school in 37.9%,  
12 college / university in 28% and no formal education in 23.6%. The median household size was 6 (IQR:  
13 4) with a mean total yearly household expenditure of US\$3569 (see appendix table 1 for imputed and  
14 non-imputed data and appendix table 2 for a comparison with expenditure assessed in the Economic  
15 and Financial survey in 2014). 67.2% of participants had sought care for their illness elsewhere prior  
16 to presentation at the tertiary referral hospital. 71.9% arrived by public transport and the majority  
17 were classed as emergency admissions (72.2%). The most common reasons for presentation were  
18 trauma, hernia, or other abdominal conditions. 67.5% underwent operative intervention with the  
19 remainder being managed by non-operative measures. Median length of stay was 8 days (IQR: 18).  
20  
21  
22

23 The total mean cost for the surgical care episode was US\$243 of which US\$24 (10%) accounted for  
24 pre-hospital direct costs (medical costs were US\$21 and non-medical were US\$3). Of the in-hospital  
25 direct costs (mean US\$172), a mean of US\$138 (63%) was due to direct medical costs and US\$34 (16%)  
26 for direct non-medical costs. Indirect costs, such as lost wages, totalled US\$46. (Table 2 and appendix  
27 table 3).  
28

29 Of the in-hospital direct medical costs, 48% were given to hospital staff (it was not clear whether the  
30 hospital staff later transferred these funds to the hospital bank or not), 33% were made directly to the  
31 hospital bank / cashiers and 17% to an external facility such as external pharmacy or diagnostic centre  
32 (Appendix table 4). A variety of means were used to meet costs (Table 3). Most (83.7% of patients)  
33 used their savings to meet some or all of the costs; only 2% (6 patients) had some form of health  
34 insurance. Wider implications included loss of wages in 36.9% and loss of job in 6.0%.  
35  
36  
37

38 Catastrophic expenditure, when defined as OOP costs of more than 40% of capacity to pay affected  
39 10% of those interviewed, rising to 18% when defined as out-of-pocket costs more than 10% of all  
40 household expenditure.  
41

42 Prior to the surgical care episode, 45% of people interviewed were below the national poverty line,  
43 90% were below the World Bank Poverty Level, and 70% below the World Bank Extreme Poverty level.  
44 Following payment for surgical care, 50% were pushed below or further below the national poverty  
45 line. Corresponding figures were 91% and 73%, for the World Bank thresholds of poverty and extreme  
46 poverty, respectively.  
47

48 Analysis of the possession of household assets demonstrated that those interviewed were more likely  
49 to have electricity, a mobile phone, radio, television, refrigerator, bicycle, motorcycle or car than those  
50 of the general population in Sierra Leone (2015 Census data, all  $p < 0.001$ ) or of the urban population  
51 in the Western Area (2015 Census data, all  $p < 0.05$ ) (Table 4).  
52  
53

54 Regression analysis demonstrated that the factors that were significantly associated with increased  
55 costs were age, length of hospital stay, and undergoing a general surgical or urological procedure  
56 (Appendix table 5).  
57

## 58 **Discussion**

59  
60

1  
2  
3 In this study, we found that accessing and receiving tertiary level surgical care in Sierra Leone  
4 requires large up-front OOP payments which have a substantial impact on individual and  
5 households' economic situations. These equate to a catastrophic expense in nearly a fifth of  
6 households and are impoverishing half of the households that receive care. We found poverty, as  
7 assessed by household expenditure, was high indicating a limited financial buffer to accommodate  
8 costs of care. This is despite most people who access surgical care owning a higher level of assets  
9 that the general population.  
10

11  
12 The majority of the OOP payments were incurred in-hospital and as a result of direct medical costs.  
13 Payment for the operation itself and medications, medical supplies, and investigations (including  
14 laboratory tests) were the biggest contribution to these costs. A small percentage of costs were  
15 categorised as unofficial, such as for "nursing care" and "tips", although these were given by a majority  
16 of people who received care. In addition, in enquiring about the payment routes for formal costs, we  
17 identified that almost half of these were being paid through unofficial payment channels and made  
18 directly to staff. We do not know whether these payments were later transferred by staff to the  
19 hospital bank, however, that these informal routes are common indicates poor financial governance  
20 which urgently needs to be addressed.  
21  
22

23 Assessment of the wider implications of seeking surgical care in SL highlighted that the majority of  
24 payments were met using savings, followed by raising money from family contributions or borrowing  
25 money which may leave households in debt. In addition, a large number of participants lost wages  
26 during the sickness episode and a proportion lost their jobs. In a country where informal work  
27 predominates and earnings can be unpredictable, this may impact on household financial security and  
28 influence future health seeking behaviour, both of the individuals affected and their immediate family  
29 and communities.  
30  
31

32 The majority of patients accessing surgical care were young males; whether this male predominance  
33 is a true reflection of disease burden in Sierra Leone or reveals a hidden gender bias in care seeking  
34 behaviour is beyond the remit of this study. Nevertheless, males who sought care in our study are  
35 traditionally the main breadwinners and the most economically active population group in SL. This  
36 loss of wages and livelihood could have implications on the wider socio-economic determinants of  
37 health and the well-being of the household. The additional burden to the patients and their  
38 households as a result of the indirect costs supports the macroeconomic argument for investing in  
39 surgical care put forward by Grimes et al, who demonstrated the opportunity to avert 36,487 DALYs  
40 by investing in surgical care at hospital level in Sierra Leone.<sup>21,22</sup>  
41  
42

43 Some specialties, such as general surgery and urology incurred much higher overall costs for the  
44 surgical episode and this may be because operative intervention (with blood transfusion and a longer  
45 length of stay) is usually required. This contrasts for example, to trauma care that was often managed  
46 non-operatively. Such non-operative treatment for trauma may be partly as a result of local surgical  
47 practice, often driven by lack of resources such as the unavailability of internal fixation wires and  
48 orthopaedic implants, and partly because some common orthopaedic problems are managed non-  
49 operatively. In addition, we found that age and length of hospital stay were associated with  
50 significantly higher costs. This may be due to the fact that those under the age of 5 years were eligible  
51 for free health care in SL and that a longer stay in hospital may be associated with higher direct non-  
52 medical and indirect costs such as payment for food and lost wages.  
53  
54

55 There are a limited number of studies to draw a direct comparison with as only a few used a similar  
56 methodology (direct interview) as opposed to modelled data or the use of caesarean section costs as  
57 a proxy measure to extrapolate costs, CE and impoverishment.<sup>2,16,23-28</sup> There are even fewer studies  
58 that report on the financial implications of all or most types of surgical care. The majority report on  
59  
60

1  
2  
3 single surgical subspecialties such as obstetric care, paediatric surgery or trauma care. Nevertheless,  
4 there have been three recent studies from Uganda reporting CE rates of 31% and IE of 47% (assessing  
5 all surgical categories), CE of 55% (in adult surgery only) and 45% (in paediatric surgery).<sup>16,29,30</sup> A study  
6 in Malawi interviewing patients undergoing hernia operations reported CE rates as high as 90% using  
7 a threshold of 10% of yearly income.<sup>26</sup> Various studies looking at injury and trauma care costs in  
8 Vietnam, India and Nigeria have reported CE rates of 60%, 30% and 86% respectively<sup>23</sup> and a study in  
9 Morocco looking at obstetric surgical care alone estimated CE rates of 88%<sup>31</sup> while an emergency  
10 obstetric care study in Indonesia estimated CE at 68%.<sup>32</sup> This highlights the inter-country variability  
11 and although that makes it difficult to draw comparative conclusions, our study results relate closest  
12 to the Ugandan study that assessed all surgical categories using a similar methodology and thresholds.  
13 This highlights the need for a standardised way of assessing and measuring the financial implications  
14 of surgical care, to allow accurate collection and reporting of these global surgery metrics on financial  
15 risk protection.  
16  
17

18  
19 In keeping with other studies, we noted lower rates of CE and IE in comparison to the modelled and  
20 extrapolated estimates for SL. This is probably because the modelled studies are based on the whole  
21 population that may require surgery and not on those that have successfully accessed surgical care.  
22 The lower rates of IE and CE seen may therefore be explained by a lack of access by the poorest. This  
23 is supported by data from SL that estimates that up to 25% of deaths in 2011 could have been averted  
24 through access to safe, timely and affordable surgical care and that SL has an unmet surgical burden  
25 of disease of 92%<sup>10</sup>, with approximately 70% of Sierra Leoneans stating that the financial burden of  
26 OOP payments for healthcare was the biggest barrier to accessing care.<sup>33,34</sup> In addition, we found that  
27 those accessing tertiary level surgical care came from predominantly urban areas of SL and when  
28 compared to the wider SL population, had significantly higher asset ownership. Using the latter as a  
29 proxy of wealth or socio-economic status, this could indicate that those able to access and receive  
30 surgical care represent the relatively wealthier households of SL and therefore that the poorest and  
31 those at the highest risk of financial catastrophe are not accessing care when needed.  
32  
33

### 34 **Limitations**

35 There are several limitations to this study. Firstly, it was dependant on recall and self-reported  
36 estimates of OOP costs and household expenditure. Although the questionnaire and methodology are  
37 a well-established way of obtaining this information in a low-resource setting where informal work  
38 predominates and payments are not often receipted, the data is still subject to respondent and recall  
39 bias. This may have contributed to missing data or the underestimation of OOP costs and possible  
40 overestimation of household expenditure which is also subject to social desirability bias.  
41  
42

43 Attempts made to minimise this included breaking down household expenditure questions to weekly,  
44 monthly and yearly costs, using a chronological approach to the OOP cost questions that helped map  
45 out the patients journey for them, encouraging participants to bring an appropriate family member  
46 to the interview, and by gaining in-country consensus and piloting the questionnaire prior to use.  
47  
48

49 Whilst attempts were made to ensure another family member or respondent was available during the  
50 interview to assist with accuracy, this was not always possible. In addition, given the reliance on  
51 savings, borrowed money and family contributions, payments were often made without the  
52 knowledge of the patient and were therefore difficult to reliably collect. As a result, the data was  
53 handled using an established statistical approach that aimed to accurately account for the missing  
54 values. Further comparison between non-imputed and imputed data was performed which showed  
55 minimal disparity suggesting reliability of this method (see Appendix).  
56  
57

58 Secondly, given the informal payment methods and informal costs, collection of this information in-  
59 hospital and often on the ward may have prevented patients from honestly declaring all costs, leading  
60

1  
2  
3 to underreporting. However, analysis of the missing data did not show a correlation or bias towards  
4 more missing costs if paid directly to staff versus at the bank.  
5

6  
7 In addition, the study only measures costs incurred during the illness episode up until discharge and  
8 therefore does not capture the indirect costs if patients are off work or do not return back to work  
9 following discharge or the costs of ongoing outpatient or follow-up care, medications and medical  
10 supplies. We have therefore likely substantially underestimated the total costs of seeking surgical  
11 care.  
12

13 Finally, the desired sample size was not achieved. Nevertheless, although sample size was not  
14 obtained, the 95% confidence interval for a catastrophic expenditure rate of 18% was 14-22% which  
15 gives the study an overall power of 90%.  
16

## 17 Conclusion

18  
19 This is the first empirical study from Sierra Leone that quantifies the financial burden of accessing and  
20 receiving surgical care. It adds insight into the global and national SL modelled estimates of the  
21 likelihood of catastrophic and impoverishing expenditure if surgery is required and joins the small but  
22 growing body of other empirical studies reporting on the OOP costs and wider financial implications  
23 of surgical care. In addition, it highlights the need to prioritise financial risk protection within  
24 healthcare and surgery if universal health coverage is to be achieved.  
25  
26  
27  
28  
29  
30

## 31 References

- 32  
33  
34  
35 1. Meara JG, Leather AJ, Hagander L, et al. Global Surgery 2030: evidence and solutions for achieving  
36 health, welfare, and economic development. *Lancet* 2015; **386**(9993): 569-624.  
37 2. Shrimme MG, Dare AJ, Alkire BC, O'Neill K, Meara JG. Catastrophic expenditure to pay for surgery  
38 worldwide: a modelling study. *Lancet Glob Health* 2015; **3 Suppl 2**: S38-44.  
39 3. Shrimme MG, Bickler SW, Alkire BC, Mock C. Global burden of surgical disease: an estimation from the  
40 provider perspective. *Lancet Glob Health* 2015; **3 Suppl 2**: S8-9.  
41 4. World Bank Development Indicators 2016. [http://data.worldbank.org/data-catalog/world-](http://data.worldbank.org/data-catalog/world-development-indicators)  
42 [development-indicators](http://data.worldbank.org/data-catalog/world-development-indicators) (accessed 10th August 2018).  
43 5. Shrimme MG, Dare A, Alkire BC, Meara JG. A global country-level comparison of the financial burden of  
44 surgery. *Br J Surg* 2016; **103**(11): 1453-61.  
45 6. WHO. World Health Organisation: Health statistics and information systems. Global Reference List of  
46 100 Core Health Indicators. . 2015. <http://www.who.int/healthinfo/indicators/2015/en/>  
47 7. World Bank: Risk of catastrophic expenditure for surgical care. Sierra Leone  
48 <https://data.worldbank.org/indicator/SH.SGR.CRSK.ZS?locations=SL>.  
49 8. Farmer PE, Kim JY. Surgery and global health: a view from beyond the OR. *World J Surg* 2008; **32**(4):  
50 533-6.  
51 9. Bolkan HA, Von Schreeb J, Samai MM, et al. Met and unmet needs for surgery in Sierra Leone: A  
52 comprehensive, retrospective, countrywide survey from all health care facilities performing operations in  
53 2012. *Surgery* 2015; **157**(6): 992-1001.  
54 10. Groen RS, Samai M, Stewart KA, et al. Untreated surgical conditions in Sierra Leone: a cluster  
55 randomised, cross-sectional, countrywide survey. *Lancet* 2012; **380**(9847): 1082-7.  
56 11. National Surgical, Obstetric and Anaesthesia Strategic Plan. . Sierra Leone Ministry of Health and  
57 Sanitation. .  
58 12. Hsu J, Flores G, Evans D, Mills A, Hanson K. Measuring financial protection against catastrophic health  
59 expenditures: methodological challenges for global monitoring. *Int J Equity Health* 2018; **17**(1): 69.  
60

13. Xu K, Evans DB, Carrin G, Aguilar-Rivera AM, Musgrove P, Evans T. Protecting households from catastrophic health spending. *Health Aff (Millwood)* 2007; **26**(4): 972-83.
14. Hoang HT, Pham TL, Vo TT, Nguyen PK, Doran CM, Hill PS. The costs of traumatic brain injury due to motorcycle accidents in Hanoi, Vietnam. *Cost Eff Resour Alloc* 2008; **6**: 17.
15. Nguyen H, Ivers R, Jan S, Martiniuk A, Pham C. Catastrophic household costs due to injury in Vietnam. *Injury* 2013; **44**(5): 684-90.
16. Anderson GA, Ilcisin L, Kayima P, et al. Out-of-pocket payment for surgery in Uganda: The rate of impoverishing and catastrophic expenditure at a government hospital. *PLoS One* 2017; **12**(10): e0187293.
17. World Health Organisation. Health statistics and information systems. Data collection tools - World Health Survey. . <http://www.who.int/healthinfo/survey/en/> (accessed 19th April 2018).
18. (SAGE). WHOHsaisDct-WSOGAaAH. <http://www.who.int/healthinfo/sage/en/>
19. Grimes CE, Billingsley ML, Dare AJ, et al. The demographics of patients affected by surgical disease in district hospitals in two sub-Saharan African countries: a retrospective descriptive analysis. *Springerplus* 2015; **4**: 750.
20. 2015 Population and House Census: Summary of Final Results. : Statistics Sierra Leone
21. Grimes CE, Quaife M, Kamara TB, Lavy CBD, Leather AJM, Bolkan HA. Macroeconomic costs of the unmet burden of surgical disease in Sierra Leone: a retrospective economic analysis. *BMJ Open* 2018; **8**(3): e017824.
22. Grimes CE, Law R, Dare A, et al. Cost-Effectiveness of Two Government District Hospitals in Sub-Saharan Africa. *World J Surg* 2017; **41**(9): 2187-92.
23. Nguyen H, Ivers R, Jan S, Pham C. Cost of surgery and catastrophic expenditure in people admitted to hospital for injuries: estimates from a cohort study in Vietnam. *Lancet* 2015; **385** Suppl 2: S50.
24. Prinja S, Bahuguna P, Gupta R, Sharma A, Rana SK, Kumar R. Coverage and Financial Risk Protection for Institutional Delivery: How Universal Is Provision of Maternal Health Care in India? *PLoS One* 2015; **10**(9): e0137315.
25. Honda A, Randaoharison PG, Matsui M. Affordability of emergency obstetric and neonatal care at public hospitals in Madagascar. *Reprod Health Matters* 2011; **19**(37): 10-20.
26. Bijlmakers L, Wientjes M, Mwapasa G, et al. Out-of-pocket payments and catastrophic household expenditure to access essential surgery in Malawi - A cross-sectional patient survey. *Ann Med Surg (Lond)* 2019; **43**: 85-90.
27. Banu T, Chowdhury TK, Aziz TT, et al. Cost Incurred by the Family for Surgery in Their Children: A Bangladesh Perspective. *World J Surg* 2018; **42**(12): 3841-8.
28. Urua U, Osungbade K, Obembe T, Adeniji F. A cost analysis of road traffic injuries in a tertiary hospital in south-west Nigeria. *Int J Inj Contr Saf Promot* 2017; **24**(4): 510-8.
29. MacKinnon N, St-Louis E, Yousef Y, Situma M, Poenaru D. Out-of-Pocket and Catastrophic Expenses Incurred by Seeking Pediatric and Adult Surgical Care at a Public, Tertiary Care Centre in Uganda. *World J Surg* 2018; **42**(11): 3520-7.
30. Yap A, Cheung M, Kakembo N, et al. From Procedure to Poverty: Out-of-Pocket and Catastrophic Expenditure for Pediatric Surgery in Uganda. *J Surg Res* 2018; **232**: 484-91.
31. Boukhalifa C, Abouchadi S, Cunden N, Witter S. The free delivery and caesarean policy in Morocco: how much do households still pay? *Trop Med Int Health* 2016; **21**(2): 245-52.
32. Quayyum Z, Nadjib M, Ensor T, Suchahya PK. Expenditure on obstetric care and the protective effect of insurance on the poor: lessons from two Indonesian districts. *Health Policy Plan* 2010; **25**(3): 237-47.
33. Ponsar F, Tayler-Smith K, Philips M, et al. No cash, no care: how user fees endanger health--lessons learnt regarding financial barriers to healthcare services in Burundi, Sierra Leone, Democratic Republic of Congo, Chad, Haiti and Mali. *Int Health* 2011; **3**(2): 91-100.
34. Xu K, Evans DB, Kawabata K, Zeramdini R, Klavus J, Murray CJ. Household catastrophic health expenditure: a multicountry analysis. *Lancet* 2003; **362**(9378): 111-7.

Figures and tables

Figure 1

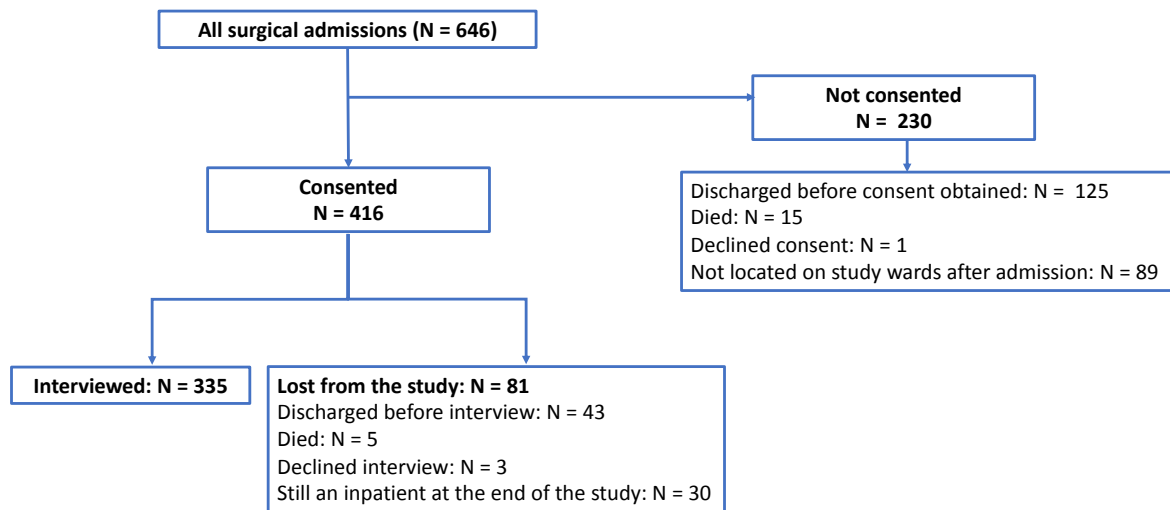

**Figure 1: Study recruitment process diagram.** Flow diagram of the total number of admissions (646) during the study period, highlighting those recruited, lost from the study and reasons for this.



## Tables

**Table 1: Participant characteristics**

| <b>Demographics of participants</b>                                              |             |
|----------------------------------------------------------------------------------|-------------|
| Total number of patients interviewed                                             | 335         |
| Mean age in years (SD)                                                           | 28 (20)     |
| Female number (%)                                                                | 132 (39.4%) |
| Urban Residents (%)                                                              | 269 (80.3%) |
| <b>Type of job (number (%)):</b>                                                 |             |
| Self Employed / Informal Sector                                                  | 224 (66.9%) |
| Employed                                                                         | 97 (29%)    |
| Unemployed / Retired                                                             | 12 (3.6%)   |
| Missing /Don't know                                                              | 2 (0.6%)    |
| <b>Level of education of main breadwinner (number (%)):</b>                      |             |
| No formal education                                                              | 79 (23.6%)  |
| Primary school                                                                   | 25 (7.5%)   |
| Secondary school                                                                 | 127 (37.9%) |
| College / University                                                             | 94 (28%)    |
| Other / Missing / Don't know                                                     | 10 (3.0%)   |
| Median household size (IQR)                                                      | 6 (4)       |
| Total yearly household expenditure (US\$)                                        | \$ 3,569    |
| Number below national poverty line prior to illness                              | 151 (45%)   |
| <b>Surgical Care Episode Descriptors</b>                                         |             |
| Median days of sickness before presentation (IQR)                                | 2 (7)       |
| Number that sought care for illness elsewhere prior to presentation at Connaught | 225 (67.2%) |
| <b>Mode of transport used to travel to hospital (number (%)):</b>                |             |
| Public transport                                                                 | 241 (71.9%) |
| Ambulance                                                                        | 67 (20%)    |
| Private transport                                                                | 23 (6.9%)   |
| Walked                                                                           | 3 (0.9%)    |
| Don't know / Missing                                                             | 1 (0.3%)    |
| Emergency admission (%)                                                          | 242 (72.2%) |
| Eligible for free health care (%)                                                | 70 (20.9%)  |
| <b>Primary diagnosis by surgical condition (number (%))</b>                      |             |
| Trauma                                                                           | 114 (34%)   |
| Hernia                                                                           | 58 (17.3%)  |
| Abdominal conditions                                                             | 56 (16.7%)  |
| Peripheral vascular disease or diabetic foot disease                             | 27 (8.1%)   |
| Urological conditions                                                            | 23 (6.9%)   |
| Breast mass / cancer                                                             | 16 (4.8%)   |
| Burns                                                                            | 15 (4.5%)   |
| ENT / dental disease                                                             | 13 (3.9%)   |
| Goitre                                                                           | 7 (2.1)     |
| Congenital abnormality (paediatrics)                                             | 3 (0.9%)    |
| Missing / don't know                                                             | 3 (0.9%)    |
| <b>Treatment (number (%)):</b>                                                   |             |
| Operative                                                                        | 226 (67.5%) |
| Non-operative                                                                    | 109 (32.5%) |
| Median length of hospital stay (LOS) in days (IQR)                               | 8 (18)      |

Table 2: Out-of-pocket costs.

| Costs                                                      | Imputed mean cost (\$US) |
|------------------------------------------------------------|--------------------------|
| <b>Prehospital costs</b>                                   |                          |
| <b>Direct pre-hospital medical OOP costs (total)</b>       | <b>21 (88% of 24)</b>    |
| - Consultation                                             | 2 (10% of 21)            |
| - Medications                                              | 12 (57% of 21)           |
| - Medical supplies                                         | 2 (10% of 21)            |
| - Investigations                                           | 4 (19% of 21)            |
| - Other miscellaneous                                      | 2 (10% of 21)            |
| <b>Direct (pre-hospital) non-medical OOP costs (total)</b> | <b>3 (13% of 24)</b>     |
| - Transport                                                | 3 (100% of 3)            |
| <b>Total pre-hospital costs</b>                            | <b>24 (10% of 243)</b>   |
| <b>In hospital costs</b>                                   |                          |
| <b>Direct medical OOP costs (total)</b>                    | <b>138 (63% of 219)</b>  |
| - Administrative                                           | 20 (14% of 138)          |
| - Medications                                              | 26 (19% of 138)          |
| - Medical supplies                                         | 14 (10% of 138)          |
| - Investigations                                           | 15 (11% of 138)          |
| - Blood transfusion                                        | 9 (7% of 138)            |
| - Total operation costs                                    | 49 (36% of 138)          |
| - Unofficial costs                                         | 6 (4% of 138)            |
| - Other / miscellaneous                                    | 1 (1% of 138)            |
| <b>Direct non-medical costs (total)</b>                    | <b>34 (16% of 219)</b>   |
| - Transport to hospital                                    | 7 (21% of 34)            |
| - Food                                                     | 20 (59% of 34)           |
| - Accommodation                                            | 0 (0% of 34)             |
| - Other*                                                   | 7 (21% of 34)            |
| <b>Indirect costs</b>                                      |                          |
| - Lost wages                                               | 46 (100% of 46)          |
| <b>TOTAL OOP COSTS</b>                                     | <b>243</b>               |

\*other relates to travel and other associated costs incurred as a result of needed investigations from and or medication / supplies from an external facility. SPSS calculates only the mean using imputed variables, hence no standard deviation is displayed.

**Table 3: How costs are met and the wider implications of seeking and undergoing surgical care (n is the number of cases with data on each variable)**

| How costs were met (total number responding to question)            | Number (%) that used this as a means of meet OOP costs                  |
|---------------------------------------------------------------------|-------------------------------------------------------------------------|
| Used <b>Savings</b> (n=326)                                         | <b>273 (83.7%)</b>                                                      |
| Arranged <b>family contributions</b> (n=331)                        | <b>128 (38.7%)</b>                                                      |
| <b>Borrowed</b> money (n=331)                                       | <b>102 (30.8%)</b>                                                      |
| Received <b>charity</b> money (n = 331)                             | <b>83 (25.3%)</b>                                                       |
| <b>Sold possessions</b> (n=329)                                     | <b>17 (5.2%)</b>                                                        |
| <b>Other</b> (n=331)                                                | <b>14 (4.2%)</b>                                                        |
| <b>Pawned</b> possessions (n=332)                                   | <b>8 (2.4%)</b>                                                         |
| Have <b>Health insurance</b> (n=335)                                | <b>6 (1.8%)</b>                                                         |
| Wider implications                                                  | Number (%) that experienced the wider implications of meeting OOP costs |
| <b>Loss of wages</b> (n = 328)                                      | <b>121 (36.9%)</b>                                                      |
| <b>Lost their job</b> / changed their role at work / home (n = 331) | <b>20 (6.0%)</b>                                                        |
| <b>Disruption to education</b> (n = 333)                            | <b>12 (3.6%)</b>                                                        |

**Table 4: Ownership of household assets in comparison to 2015 census data**

| Household assets    | Surgical cohort<br>Number (%) of households that own the asset | 2015 Census data<br>Whole country data |
|---------------------|----------------------------------------------------------------|----------------------------------------|
| <b>Electricity</b>  | 227 (67.8%)                                                    | 17.8%                                  |
| <b>Mobile phone</b> | 326 (97.3%)                                                    | 62.94%                                 |
| <b>Radio</b>        | 280 (83.6%)                                                    | 58.03%                                 |
| <b>Television</b>   | 212 (63.3%)                                                    | 19.76%                                 |
| <b>Refrigerator</b> | 119 (35.5%)                                                    | 8.22%                                  |
| <b>Bicycle</b>      | 38 (11.3%)                                                     | 6.43%                                  |
| <b>Motorcycle</b>   | 8 (14.3%)                                                      | 7.62%                                  |
| <b>Car</b>          | 50 (14.9%)                                                     | 3.65%                                  |

## Appendix

**Appendix table 1: Household expenditure showing imputed and non-imputed data sets.**

Comparison of non-imputed and imputed data on household expenditure using Multiple Imputation Chained Equations to compute missing data-points using predictive mean matching.

| Household expense                                                                                                                                       | Non-imputed data mean (SD) (Le and \$US)           | Imputed data pooled mean (Le and \$ US) |
|---------------------------------------------------------------------------------------------------------------------------------------------------------|----------------------------------------------------|-----------------------------------------|
| <b>Individual Consumption Expenditure by Households Including all variables collected</b>                                                               | <b>Le 39,665,597 (53,679,740) \$ 4,425 (5,989)</b> | <b>Le 47,944,384 \$5,349</b>            |
| <b>Individual Consumption Expenditure by Households Excluding variables with &gt; 20% missing data i.e. clothing, mobile phone credit and transport</b> | <b>Le 28,134,505 (31,539,987) \$ 3,139 (3,519)</b> | <b>Le 31,988,507 \$ 3,569</b>           |
| Food and non-alcoholic beverages                                                                                                                        | Le 18,616,404 (22,364,391) \$ 2,077 (2,495)        | Le 20,867,118 \$ 2,328                  |
| Alcoholic Beverages, Tobacco and Narcotics                                                                                                              | Le 252,991 (1,047,612) \$ 28 (117)                 | Le 314,095 \$ 35                        |
| Rental                                                                                                                                                  | Le 884,123 (4,670,009) \$ 99 (521)                 | Le 876,940 \$ 98                        |
| Household maintenance                                                                                                                                   | Le 108,092 (298,466) \$ 12 (33)                    | Le 130,857 \$ 15                        |
| Electricity, gas and other fuels                                                                                                                        | Le 720,748 (1,068,694) \$ 80 (119)                 | Le 747,701 \$ 83                        |
| Furnishings, household equipment and routine household maintenance                                                                                      | Le 632,577 (1,065,761) \$ 71 (119)                 | Le 699,188 \$ 78                        |
| Healthcare (traditional and western medicine)                                                                                                           | Le 561,770 (1,490,207) \$ 63 (166)                 | Le 740,205 \$ 83                        |
| Recreation and cultural services                                                                                                                        | Le 821,684 (1,894,677) \$ 92 (211)                 | Le 1,121,965 \$ 125                     |
| Education                                                                                                                                               | Le 1,338,183 (2,295,578) \$ 149 (256)              | Le 1,614,982 \$ 180                     |
| Personal care / toiletries                                                                                                                              | Le 609,012 (629,656) \$ 68 (70)                    | Le 627,269 \$ 70                        |
| Health insurance                                                                                                                                        | Le 8,333 (138,661) \$ 1 (15)                       | Le 13,370 \$ 1                          |
| Remittance                                                                                                                                              | Le 974,408 (1,655,020) \$ 109 (185)                | Le 1,015,363 \$ 113                     |
| Donations                                                                                                                                               | Le 185,233 (475,436) \$ 21 (53)                    | Le 203,246 \$ 23                        |
| Livestock                                                                                                                                               | Le 41,400                                          | Le 45,254                               |

|       |                                     |                   |
|-------|-------------------------------------|-------------------|
|       | (213,804)<br>\$ 5 (24)              | \$5               |
| Taxes | Le 59,500<br>(261,497)<br>\$ 7 (29) | Le 73,723<br>\$ 8 |

**Appendix table 2: Household expenditure data.** Variables on household expenditure shown here, for comparison, with the Economic and Financial survey SL 2014 data. Categories were harmonised where possible, however given differences in questions asked between surveys, an exact match of categories was not possible to achieve.

| <b>Household consumption expenditure (in Leones (Le) and USD (\$))</b>      |                                                             |                                         |
|-----------------------------------------------------------------------------|-------------------------------------------------------------|-----------------------------------------|
| <b>Household Expense</b>                                                    | <b>Sierra Leone Economic and Financial Survey data 2014</b> | <b>Study data</b>                       |
| <b>Individual Consumption Expenditure by Households (Total Expenditure)</b> | <b>Le 15,414,816</b><br><b>\$ 1,739</b>                     | <b>Le 31,988,507</b><br><b>\$ 3,569</b> |
| <b>Food and non-alcoholic beverages</b>                                     | <b>Le 6,838,365</b><br><b>\$ 771</b>                        | <b>Le 20,867,118</b><br><b>\$ 2,328</b> |
| Food                                                                        | Le 6,644,019<br>\$ 74                                       | Le 17,925,090<br>\$ 2,000               |
| Non-alcoholic beverages                                                     | Le 194,346<br>\$ 22                                         | Le 2,942,028<br>\$ 328                  |
| <b>Alcoholic Beverages, Tobacco and Narcotics</b>                           | <b>Le 450,612</b><br><b>\$ 51</b>                           | <b>Le 314,095</b><br><b>\$ 35</b>       |
| <b>Housing, water, electricity, gas and other fuels</b>                     | <b>Le 1,058,449</b><br><b>\$119</b>                         | <b>Le 875,672</b><br><b>\$ 98</b>       |
| Rental                                                                      | Le 253,948<br>\$ 29                                         | Le 876,940<br>\$ 98                     |
| Maintenance and repair of the dwelling                                      | Le 32,650<br>\$ 4                                           | Le 876,940<br>\$ 98                     |
| Electricity, gas and other fuels                                            | Le 595,832<br>\$ 67                                         | Le 747,701<br>\$ 83                     |
| <b>Furnishings, household equipment and routine household maintenance</b>   | <b>Le 413,364</b><br><b>\$ 47</b>                           | <b>Le 699,188</b><br><b>\$ 78</b>       |
| Furnishings                                                                 | Le 88,058<br>\$ 10                                          | Le 196,217<br>\$ 22                     |
| Household appliances                                                        | Le 41,821<br>\$ 5                                           | Le 314,772<br>\$ 35                     |
| Tools and equipment for house and garden                                    | Le 45,403<br>\$ 5                                           | Le 57,344<br>\$ 6                       |
| Goods and services for routine household maintenance                        | Le 105,438<br>\$ 12                                         | Le 130,857<br>\$ 15                     |
| Purchase of vehicles                                                        | Le 108,710<br>\$ 12                                         | Le 160,759<br>\$ 18                     |
| Educations                                                                  | Le 794,478<br>\$ 90                                         | Le 1,614,982<br>\$ 180                  |
| Insurance (HI)                                                              | Le 38,890<br>\$ 4                                           | Le 13,370<br>\$ 1                       |

**Appendix table 3: Imputed and non-imputed data for out-of-pocket costs for comparison.**

| Costs                                                      | Imputed Mean cost (\$US) | Non-imputed Mean cost (\$US) (SD) |
|------------------------------------------------------------|--------------------------|-----------------------------------|
| <b>Prehospital costs</b>                                   |                          |                                   |
| <b>Direct pre-hospital medical OOP costs (total)</b>       | <b>21 (88% of 24)</b>    | <b>14 (65)</b>                    |
| - Consultation                                             | 2 (10% of 21)            | 1 (6)                             |
| - Medications                                              | 12 (57% of 21)           | 9 (46)                            |
| - Medical supplies                                         | 2 (10% of 21)            | 2 (8)                             |
| - Investigations                                           | 4 (19% of 21)            | 4 (25)                            |
| - Other miscellaneous                                      | 2 (10% of 21)            | 1 (10)                            |
| <b>Direct (pre-hospital) non-medical OOP costs (total)</b> | <b>3 (13% of 24)</b>     | <b>3 (9)</b>                      |
| - Transport                                                | 3 (100% of 3)            | 3 (9)                             |
| <b>Total pre-hospital costs</b>                            | <b>24 (10% of 243)</b>   | <b>25 (75)</b>                    |
| <b>In hospital costs</b>                                   |                          |                                   |
| <b>Direct medical OOP costs (total)</b>                    | <b>138 (63% of 219)</b>  | <b>109 (121)</b>                  |
| - Administrative                                           | 20 (14% of 138)          | 16 (24)                           |
| - Medications                                              | 26 (19% of 138)          | 25 (61)                           |
| - Medical supplies                                         | 14 (10% of 138)          | 11 (33)                           |
| - Investigations                                           | 15 (11% of 138)          | 14 (23)                           |
| - Blood transfusion                                        | 9 (7% of 138)            | 9 (22)                            |
| - Total operation costs                                    | 49 (36% of 138)          | 51 (75)                           |
| - Unofficial costs                                         | 6 (4% of 138)            | 5 (9)                             |
| - Other / miscellaneous                                    | 1 (1% of 138)            | 1 (8)                             |
| <b>Direct non-medical costs (total)</b>                    | <b>34 (16% of 219)</b>   | <b>34 (34)</b>                    |
| - Transport to hospital                                    | 7 (21% of 34)            | 7 (17)                            |
| - Food                                                     | 20 (59% of 34)           | 21 (20)                           |
| - Accommodation                                            | 0 (0% of 34)             | 0 (0)                             |
| - Other*                                                   | 7 (21% of 34)            | 6 (10)                            |
| <b>Indirect costs</b>                                      |                          |                                   |
| - Lost wages                                               | 46 (100% of 46)          | 35 (116)                          |
| <b>TOTAL OOP COSTS</b>                                     | <b>243</b>               | <b>176 (165)</b>                  |

\*other relates to travel and other associated costs incurred as a result for needed investigations from and or medication / supplies from an external facility. SPSS calculates only the mean using imputed variables, hence no standard deviation is displayed.

**Appendix table 4: Route of payment for OOP costs; percentage of the total OOP costs by cost categories paid to bank / cashier, directly to staff or externally for different services accessed once tertiary level care was reached**

| Costs                          | % paid to Hospital bank / cashier | % paid directly to or via staff | % paid externally | % unknown    | Total       |
|--------------------------------|-----------------------------------|---------------------------------|-------------------|--------------|-------------|
| <b>TOTAL in-hospital costs</b> | <b>32.64%</b>                     | <b>48.16%</b>                   | <b>16.50%</b>     | <b>2.70%</b> | <b>100%</b> |
| <b>Administration</b>          | <b>52.03%</b>                     | <b>42.53%</b>                   | -                 | 5.44%        | 100%        |
| - Registration fees            | 90.98%                            | 8.71%                           | -                 | 0.30%        | 100%        |
| - Admission fees               | 66.78%                            | 32.39%                          | -                 | 0.83%        | 100%        |
| - Triage fees                  | 8.05%                             | 91.95%                          | -                 | 0.00%        | 100%        |
| - Bed fees                     | 19.47%                            | 46.13%                          | -                 | 34.40%       | 100%        |

|                                                             |               |               |               |              |             |
|-------------------------------------------------------------|---------------|---------------|---------------|--------------|-------------|
| - Discharge fees                                            | 41.19%        | 57.28%        | -             | 1.53%        | 100%        |
| <b>Investigations</b>                                       | <b>19.39%</b> | <b>44.29%</b> | <b>33.73%</b> | <b>2.59%</b> | <b>100%</b> |
| - Laboratory                                                | 25.68%        | 40.29%        | 30.13%        | 3.90%        | 100%        |
| - Imaging                                                   | 14.43%        | 47.44%        | 36.57%        | 1.56%        | 100%        |
| <b>Total operation costs</b>                                | <b>55.40%</b> | <b>32.89%</b> | <b>9.35%</b>  | <b>2.35%</b> | <b>100%</b> |
| - Operation                                                 | 80.10%        | 18.91%        | -             | 1.00%        | 100%        |
| - Medical supplies for the operation                        | 13.42%        | 56.59%        | 25.31%        | 4.68%        | 100%        |
| - Other / miscellaneous                                     | 69.77%        | 30.23%        | -             | 0.00%        | 100%        |
| <b>Blood transfusion</b>                                    | <b>16.24%</b> | <b>67.68%</b> | <b>13.85%</b> | <b>2.23%</b> | <b>100%</b> |
| <b>Total medications and medical supplies for ward care</b> | <b>4.82%</b>  | <b>61.00%</b> | <b>31.73%</b> | <b>2.45%</b> | <b>100%</b> |
| - Medications                                               | 2.19%         | 62.86%        | 31.91%        | 3.03%        | 100%        |
| - Medical supplies                                          | 10.81%        | 56.74%        | 31.31%        | 1.14%        | 100%        |
| <b>Informal payment</b>                                     | <b>2.44%</b>  | <b>97.56%</b> | -             | <b>0.00%</b> | <b>100%</b> |
| - Doctors' fees                                             | 8.72%         | 91.28%        | -             | 0.00%        | 100%        |
| - Nursing care                                              | 0%            | 100%          | -             | 0.00%        | 100%        |
| - Porters                                                   | 0%            | 100%          | -             | 0.00%        | 100%        |
| - Tips                                                      | 0%            | 100%          | -             | 0.00%        | 100%        |
| <b>Other / miscellaneous costs</b>                          | <b>0%</b>     | <b>98.37%</b> | <b>0</b>      | <b>1.63%</b> | <b>100%</b> |

**Appendix table 5: Linear regression analysis showing odds of increasing in-hospital costs of care for each variable using a GLM with imputed variables using a Tweedie 1.9 function.**

| Variable              |                            | Odds Ratio | 95% CI       | p-value |
|-----------------------|----------------------------|------------|--------------|---------|
| Sex                   | Female                     | ref        |              |         |
|                       | Male                       | 1.05       | (0.86-1.29)  | 0.63    |
| Age                   | Age                        | 1.02       | (1.01-1.02)  | 0.00    |
| Length of stay        | Length of stay             | 1.02       | (1.02 -1.03) | 0.00    |
| Type of admission     | Elective admission         | ref        |              |         |
|                       | Emergency admission        | 0.96       | (0.75-1.24)  | 0.77    |
| Category of operation | Non-operative              | ref        |              |         |
|                       | Burns                      | 1.33       | (0.25-7.00)  | 0.74    |
|                       | ENT                        | 0.64       | (0.36-1.166) | 0.14    |
|                       | General surgery            | 1.67       | (1.29-2.17)  | 0.00    |
|                       | General paediatric surgery | 0.84       | (0.57-1.24)  | 0.38    |
|                       | Trauma and orthopaedic     | 1.30       | (0.98- 1.74) | 0.07    |
|                       | Urology                    | 2.08       | (1.22-3.53)  | 0.01    |
| Area of residence     | Rural                      | ref        |              |         |
|                       | Urban                      | 0.98       | (0.76-1.25)  | 0.85    |



1  
2  
3  
4  
5  
6  
7  
8  
9  
10  
11  
12  
13  
14  
15  
16  
17  
18  
19  
20  
21  
22  
23  
24  
25  
26  
27  
28  
29  
30  
31  
32  
33  
34  
35  
36  
37  
38  
39  
40  
41  
42  
43  
44  
45  
46  
47  
48  
49  
50  
51  
52  
53  
54  
55  
56  
57  
58  
59  
60

For peer review only

## Appendix

**Appendix table 1: Household expenditure showing imputed and non-imputed data sets.**

Comparison of non-imputed and imputed data on household expenditure using Multiple Imputation Chained Equations to compute missing data-points using predictive mean matching.

| Household expense                                                                                                                                       | Non-imputed data mean (SD) (Le and \$US)           | Imputed data pooled mean (Le and \$ US) |
|---------------------------------------------------------------------------------------------------------------------------------------------------------|----------------------------------------------------|-----------------------------------------|
| <b>Individual Consumption Expenditure by Households Including all variables collected</b>                                                               | <b>Le 39,665,597 (53,679,740) \$ 4,425 (5,989)</b> | <b>Le 47,944,384 \$5,349</b>            |
| <b>Individual Consumption Expenditure by Households Excluding variables with &gt; 20% missing data i.e. clothing, mobile phone credit and transport</b> | <b>Le 28,134,505 (31,539,987) \$ 3,139 (3,519)</b> | <b>Le 31,988,507 \$ 3,569</b>           |
| Food and non-alcoholic beverages                                                                                                                        | Le 18,616,404 (22,364,391) \$ 2,077 (2,495)        | Le 20,867,118 \$ 2,328                  |
| Alcoholic Beverages, Tobacco and Narcotics                                                                                                              | Le 252,991 (1,047,612) \$ 28 (117)                 | Le 314,095 \$ 35                        |
| Rental                                                                                                                                                  | Le 884,123 (4,670,009) \$ 99 (521)                 | Le 876,940 \$ 98                        |
| Household maintenance                                                                                                                                   | Le 108,092 (298,466) \$ 12 (33)                    | Le 130,857 \$ 15                        |
| Electricity, gas and other fuels                                                                                                                        | Le 720,748 (1,068,694) \$ 80 (119)                 | Le 747,701 \$ 83                        |
| Furnishings, household equipment and routine household maintenance                                                                                      | Le 632,577 (1,065,761) \$ 71 (119)                 | Le 699,188 \$ 78                        |
| Healthcare (traditional and western medicine)                                                                                                           | Le 561,770 (1,490,207) \$ 63 (166)                 | Le 740,205 \$ 83                        |
| Recreation and cultural services                                                                                                                        | Le 821,684 (1,894,677) \$ 92 (211)                 | Le 1,121,965 \$ 125                     |
| Education                                                                                                                                               | Le 1,338,183 (2,295,578) \$ 149 (256)              | Le 1,614,982 \$ 180                     |
| Personal care / toiletries                                                                                                                              | Le 609,012 (629,656) \$ 68 (70)                    | Le 627,269 \$ 70                        |
| Health insurance                                                                                                                                        | Le 8,333 (138,661) \$ 1 (15)                       | Le 13,370 \$ 1                          |
| Remittance                                                                                                                                              | Le 974,408 (1,655,020) \$ 109 (185)                | Le 1,015,363 \$ 113                     |
| Donations                                                                                                                                               | Le 185,233 (475,436) \$ 21 (53)                    | Le 203,246 \$ 23                        |
| Livestock                                                                                                                                               | Le 41,400 (213,804)                                | Le 45,254 \$5                           |

1  
2  
3  
4  
5  
6  
7  
8  
9  
10  
11  
12  
13  
14  
15  
16  
17  
18  
19  
20  
21  
22  
23  
24  
25  
26  
27  
28  
29  
30  
31  
32  
33  
34  
35  
36  
37  
38  
39  
40  
41  
42  
43  
44  
45  
46  
47  
48  
49  
50  
51  
52  
53  
54  
55  
56  
57  
58  
59  
60

|       |                                     |                       |
|-------|-------------------------------------|-----------------------|
|       | \$ 5 (24)                           |                       |
| Taxes | Le 59,500<br>(261,497)<br>\$ 7 (29) | Le 73,723<br><br>\$ 8 |

For peer review only

**Appendix table 2: Household expenditure data.** Variables on household expenditure shown here, for comparison, with the Economic and Financial survey SL 2014 data. Categories were harmonised where possible, however given differences in questions asked between surveys, an exact match of categories was not possible to achieve.

| <b>Household consumption expenditure (in Leones (Le) and USD (\$))</b>      |                                                             |                                   |
|-----------------------------------------------------------------------------|-------------------------------------------------------------|-----------------------------------|
| <b>Household Expense</b>                                                    | <b>Sierra Leone Economic and Financial Survey data 2014</b> | <b>Study data</b>                 |
| <b>Individual Consumption Expenditure by Households (Total Expenditure)</b> | <b>Le 15,414,816<br/>\$ 1,739</b>                           | <b>Le 31,988,507<br/>\$ 3,569</b> |
| <b>Food and non-alcoholic beverages</b>                                     | <b>Le 6,838,365<br/>\$ 771</b>                              | <b>Le 20,867,118<br/>\$ 2,328</b> |
| Food                                                                        | Le 6,644,019<br>\$ 74                                       | Le 17,925,090<br>\$ 2,000         |
| Non-alcoholic beverages                                                     | Le 194,346<br>\$ 22                                         | Le 2,942,028<br>\$ 328            |
| <b>Alcoholic Beverages, Tobacco and Narcotics</b>                           | <b>Le 450,612<br/>\$ 51</b>                                 | <b>Le 314,095<br/>\$ 35</b>       |
| <b>Housing, water, electricity, gas and other fuels</b>                     | <b>Le 1,058,449<br/>\$119</b>                               | <b>Le 875,672<br/>\$ 98</b>       |
| Rental                                                                      | Le 253,948<br>\$ 29                                         | Le 876,940<br>\$ 98               |
| Maintenance and repair of the dwelling                                      | Le 32,650<br>\$ 4                                           | Le 876,940<br>\$ 98               |
| Electricity, gas and other fuels                                            | Le 595,832<br>\$ 67                                         | Le 747,701<br>\$ 83               |
| <b>Furnishings, household equipment and routine household maintenance</b>   | <b>Le 413,364<br/>\$ 47</b>                                 | <b>Le 699,188<br/>\$ 78</b>       |
| Furnishings                                                                 | Le 88,058<br>\$ 10                                          | Le 196,217<br>\$ 22               |
| Household appliances                                                        | Le 41,821<br>\$ 5                                           | Le 314,772<br>\$ 35               |
| Tools and equipment for house and garden                                    | Le 45,403<br>\$ 5                                           | Le 57,344<br>\$ 6                 |
| Goods and services for routine household maintenance                        | Le 105,438<br>\$ 12                                         | Le 130,857<br>\$ 15               |
| Purchase of vehicles                                                        | Le 108,710<br>\$ 12                                         | Le 160,759<br>\$ 18               |
| Educations                                                                  | Le 794,478<br>\$ 90                                         | Le 1,614,982<br>\$ 180            |
| Insurance (HI)                                                              | Le 38,890<br>\$ 4                                           | Le 13,370<br>\$ 1                 |

Appendix table 3: Imputed and non-imputed data for out-of-pocket costs for comparison.

| Costs                                                      | Imputed<br>Mean cost (\$US) | Non-imputed<br>Mean cost (\$US) (SD) |
|------------------------------------------------------------|-----------------------------|--------------------------------------|
| <b>Prehospital costs</b>                                   |                             |                                      |
| <b>Direct pre-hospital medical OOP costs (total)</b>       | <b>21 (88% of 24)</b>       | <b>14 (65)</b>                       |
| - Consultation                                             | 2 (10% of 21)               | 1 (6)                                |
| - Medications                                              | 12 (57% of 21)              | 9 (46)                               |
| - Medical supplies                                         | 2 (10% of 21)               | 2 (8)                                |
| - Investigations                                           | 4 (19% of 21)               | 4 (25)                               |
| - Other miscellaneous                                      | 2 (10% of 21)               | 1 (10)                               |
| <b>Direct (pre-hospital) non-medical OOP costs (total)</b> | <b>3 (13% of 24)</b>        | <b>3 (9)</b>                         |
| - Transport                                                | 3 (100% of 3)               | 3 (9)                                |
| <b>Total pre-hospital costs</b>                            | <b>24 (10% of 243)</b>      | <b>25 (75)</b>                       |
| <b>In hospital costs</b>                                   |                             |                                      |
| <b>Direct medical OOP costs (total)</b>                    | <b>138 (63% of 219)</b>     | <b>109 (121)</b>                     |
| - Administrative                                           | 20 (14% of 138)             | 16 (24)                              |
| - Medications                                              | 26 (19% of 138)             | 25 (61)                              |
| - Medical supplies                                         | 14 (10% of 138)             | 11 (33)                              |
| - Investigations                                           | 15 (11% of 138)             | 14 (23)                              |
| - Blood transfusion                                        | 9 (7% of 138)               | 9 (22)                               |
| - Total operation costs                                    | 49 (36% of 138)             | 51 (75)                              |
| - Unofficial costs                                         | 6 (4% of 138)               | 5 (9)                                |
| - Other / miscellaneous                                    | 1 (1% of 138)               | 1 (8)                                |
| <b>Direct non-medical costs (total)</b>                    | <b>34 (16% of 219)</b>      | <b>34 (34)</b>                       |
| - Transport to hospital                                    | 7 (21% of 34)               | 7 (17)                               |
| - Food                                                     | 20 (59% of 34)              | 21 (20)                              |
| - Accommodation                                            | 0 (0% of 34)                | 0 (0)                                |
| - Other*                                                   | 7 (21% of 34)               | 6 (10)                               |
| <b>Indirect costs</b>                                      |                             |                                      |
| - Lost wages                                               | 46 (100% of 46)             | 35 (116)                             |
| <b>TOTAL OOP COSTS</b>                                     | <b>243</b>                  | <b>176 (165)</b>                     |

\*other relates to travel and other associated costs incurred as a result for needed investigations from and or medication / supplies from an external facility. SPSS calculates only the mean using imputed variables, hence no standard deviation is displayed.

**Appendix table 4: Route of payment for OOP costs; percentage of the total OOP costs by cost categories paid to bank / cashier, directly to staff or externally for different services accessed once tertiary level care was reached**

| Costs                                                       | % paid to Hospital bank / cashier | % paid directly to or via staff | % paid externally | % unknown    | Total       |
|-------------------------------------------------------------|-----------------------------------|---------------------------------|-------------------|--------------|-------------|
| <b>TOTAL in-hospital costs</b>                              | <b>32.64%</b>                     | <b>48.16%</b>                   | <b>16.50%</b>     | <b>2.70%</b> | <b>100%</b> |
| <b>Administration</b>                                       | <b>52.03%</b>                     | <b>42.53%</b>                   | -                 | 5.44%        | 100%        |
| - Registration fees                                         | 90.98%                            | 8.71%                           | -                 | 0.30%        | 100%        |
| - Admission fees                                            | 66.78%                            | 32.39%                          | -                 | 0.83%        | 100%        |
| - Triage fees                                               | 8.05%                             | 91.95%                          | -                 | 0.00%        | 100%        |
| - Bed fees                                                  | 19.47%                            | 46.13%                          | -                 | 34.40%       | 100%        |
| - Discharge fees                                            | 41.19%                            | 57.28%                          | -                 | 1.53%        | 100%        |
| <b>Investigations</b>                                       | <b>19.39%</b>                     | <b>44.29%</b>                   | <b>33.73%</b>     | <b>2.59%</b> | <b>100%</b> |
| - Laboratory                                                | 25.68%                            | 40.29%                          | 30.13%            | 3.90%        | 100%        |
| - Imaging                                                   | 14.43%                            | 47.44%                          | 36.57%            | 1.56%        | 100%        |
| <b>Total operation costs</b>                                | <b>55.40%</b>                     | <b>32.89%</b>                   | <b>9.35%</b>      | <b>2.35%</b> | <b>100%</b> |
| - Operation                                                 | 80.10%                            | 18.91%                          | -                 | 1.00%        | 100%        |
| - Medical supplies for the operation                        | 13.42%                            | 56.59%                          | 25.31%            | 4.68%        | 100%        |
| - Other / miscellaneous                                     | 69.77%                            | 30.23%                          | -                 | 0.00%        | 100%        |
| <b>Blood transfusion</b>                                    | <b>16.24%</b>                     | <b>67.68%</b>                   | <b>13.85%</b>     | <b>2.23%</b> | <b>100%</b> |
| <b>Total medications and medical supplies for ward care</b> | <b>4.82%</b>                      | <b>61.00%</b>                   | <b>31.73%</b>     | <b>2.45%</b> | <b>100%</b> |
| - Medications                                               | 2.19%                             | 62.86%                          | 31.91%            | 3.03%        | 100%        |
| - Medical supplies                                          | 10.81%                            | 56.74%                          | 31.31%            | 1.14%        | 100%        |
| <b>Informal payment</b>                                     | <b>2.44%</b>                      | <b>97.56%</b>                   | -                 | <b>0.00%</b> | <b>100%</b> |
| - Doctors' fees                                             | 8.72%                             | 91.28%                          | -                 | 0.00%        | 100%        |
| - Nursing care                                              | 0%                                | 100%                            | -                 | 0.00%        | 100%        |
| - Porters                                                   | 0%                                | 100%                            | -                 | 0.00%        | 100%        |
| - Tips                                                      | 0%                                | 100%                            | -                 | 0.00%        | 100%        |
| <b>Other / miscellaneous costs</b>                          | <b>0%</b>                         | <b>98.37%</b>                   | <b>0</b>          | <b>1.63%</b> | <b>100%</b> |

**Appendix table 5: Linear regression analysis showing odds of increasing in-hospital costs of care for each variable using a GLM with imputed variables using a Tweedie 1.9 function.**

| Variable              |                            | Odds Ratio | 95% CI       | p-value |
|-----------------------|----------------------------|------------|--------------|---------|
| Sex                   | Female                     | ref        |              |         |
|                       | Male                       | 1.05       | (0.86-1.29)  | 0.63    |
| Age                   | Age                        | 1.02       | (1.01-1.02)  | 0.00    |
| Length of stay        | Length of stay             | 1.02       | (1.02 -1.03) | 0.00    |
| Type of admission     | Elective admission         | ref        |              |         |
|                       | Emergency admission        | 0.96       | (0.75-1.24)  | 0.77    |
| Category of operation | Non-operative              | ref        |              |         |
|                       | Burns                      | 1.33       | (0.25-7.00)  | 0.74    |
|                       | ENT                        | 0.64       | (0.36-1.166) | 0.14    |
|                       | General surgery            | 1.67       | (1.29-2.17)  | 0.00    |
|                       | General paediatric surgery | 0.84       | (0.57-1.24)  | 0.38    |
|                       | Trauma and orthopaedic     | 1.30       | (0.98- 1.74) | 0.07    |
|                       | Urology                    | 2.08       | (1.22-3.53)  | 0.01    |
| Area of residence     | Rural                      | ref        |              |         |
|                       | Urban                      | 0.98       | (0.76-1.25)  | 0.85    |

# BMJ Open

## What is the financial burden to patients of accessing surgical care in Sierra Leone? A cross-sectional survey of catastrophic and impoverishing expenditure

|                                 |                                                                                                                                                                                                                                                                                                                                                                                                                                                                                                                                                                                                                                                            |
|---------------------------------|------------------------------------------------------------------------------------------------------------------------------------------------------------------------------------------------------------------------------------------------------------------------------------------------------------------------------------------------------------------------------------------------------------------------------------------------------------------------------------------------------------------------------------------------------------------------------------------------------------------------------------------------------------|
| Journal:                        | <i>BMJ Open</i>                                                                                                                                                                                                                                                                                                                                                                                                                                                                                                                                                                                                                                            |
| Manuscript ID                   | bmjopen-2020-039049.R1                                                                                                                                                                                                                                                                                                                                                                                                                                                                                                                                                                                                                                     |
| Article Type:                   | Original research                                                                                                                                                                                                                                                                                                                                                                                                                                                                                                                                                                                                                                          |
| Date Submitted by the Author:   | 13-Jul-2020                                                                                                                                                                                                                                                                                                                                                                                                                                                                                                                                                                                                                                                |
| Complete List of Authors:       | Phull, Manraj ; West Hertfordshire Hospitals NHS Trust<br>Grimes, Caris; King's College London Faculty of Life Sciences and Medicine; Medway NHS Foundation Trust<br>Kamara, Thaim; University of Sierra Leone College of Medicine and Allied Health Sciences, Surgery<br>Wurie, Haja ; University of Sierra Leone College of Medicine and Allied Health Sciences<br>Leather, Andy; King's College London Faculty of Life Sciences and Medicine, King's Centre for Global Health<br>Davies, Justine ; King's College London Faculty of Life Sciences and Medicine, Centre for Global Health; University of Birmingham Institute of Applied Health Research |
| <b>Primary Subject Heading</b>: | Health economics                                                                                                                                                                                                                                                                                                                                                                                                                                                                                                                                                                                                                                           |
| Secondary Subject Heading:      | Global health, Health policy, Surgery                                                                                                                                                                                                                                                                                                                                                                                                                                                                                                                                                                                                                      |
| Keywords:                       | SURGERY, HEALTH ECONOMICS, Health policy < HEALTH SERVICES ADMINISTRATION & MANAGEMENT                                                                                                                                                                                                                                                                                                                                                                                                                                                                                                                                                                     |
|                                 |                                                                                                                                                                                                                                                                                                                                                                                                                                                                                                                                                                                                                                                            |

SCHOLARONE™  
Manuscripts





I, the Submitting Author has the right to grant and does grant on behalf of all authors of the Work (as defined in the below author licence), an exclusive licence and/or a non-exclusive licence for contributions from authors who are: i) UK Crown employees; ii) where BMJ has agreed a CC-BY licence shall apply, and/or iii) in accordance with the terms applicable for US Federal Government officers or employees acting as part of their official duties; on a worldwide, perpetual, irrevocable, royalty-free basis to BMJ Publishing Group Ltd ("BMJ") its licensees and where the relevant Journal is co-owned by BMJ to the co-owners of the Journal, to publish the Work in this journal and any other BMJ products and to exploit all rights, as set out in our [licence](#).

The Submitting Author accepts and understands that any supply made under these terms is made by BMJ to the Submitting Author unless you are acting as an employee on behalf of your employer or a postgraduate student of an affiliated institution which is paying any applicable article publishing charge ("APC") for Open Access articles. Where the Submitting Author wishes to make the Work available on an Open Access basis (and intends to pay the relevant APC), the terms of reuse of such Open Access shall be governed by a Creative Commons licence – details of these licences and which [Creative Commons](#) licence will apply to this Work are set out in our licence referred to above.

Other than as permitted in any relevant BMJ Author's Self Archiving Policies, I confirm this Work has not been accepted for publication elsewhere, is not being considered for publication elsewhere and does not duplicate material already published. I confirm all authors consent to publication of this Work and authorise the granting of this licence.

1  
2  
3  
4  
5  
6  
7

## What is the financial burden to patients of accessing surgical care in Sierra Leone? A cross-sectional survey of catastrophic and impoverishing expenditure.

8 Manraj Phull (1), Caris E Grimes (2, 3), Thaim B Kamara (4), Haja Wurie (5), Andrew JM Leather (2) \*  
9 and Justine Davies (2, 6, 7) \*

10  
11  
12 \*Co-senior authors

13  
14 Authors

15  
16 Manraj Phull BSc MBBS MRCS MSc

17 1) West Hertfordshire Hospitals NHS Trust. Watford General Hospital, Watford, Hertfordshire, UK

18  
19 Caris E Grimes BSc MBBS MEd FRCS MD

20 2) King's Centre for Global Health and Health Partnerships, School of Population Health and  
21 Environmental Sciences, King's College London, London, SE5 9RJ, UK

22 3) Medway NHS Foundation Trust, Gillingham, Kent, UK

23  
24  
25 Thaim B Kamara MBChB, FWACS

26 4) College of Medicine and Allied Health Sciences, Freetown, Sierra Leone

27  
28 Haja Wurie

29 5) College of Medicine and Allied Health Sciences, Freetown, Sierra Leone

30  
31 Andrew JM Leather MBBS, FRCS, MS

32 2) King's Centre for Global Health and Health Partnerships, School of Population Health and  
33 Environmental Sciences, King's College London, London, SE5 9RJ, UK

34  
35 Justine Davies (Corresponding Author) MBChB, MD (res), MRCP

36 2) King's Centre for Global Health and Health Partnerships, School of Population Health and  
37 Environmental Sciences, King's College London, London, SE5 9RJ, UK

38 6) Institute for Applied Health Research, University of Birmingham, Edgbaston, Birmingham B15 2TT  
39 UK

40 7) Medical Research Council/Wits University Rural Public Health and Health Transitions Research  
41 Unit, Faculty of Health Sciences, School of Public Health, University of the Witwatersrand,  
42 Johannesburg, South Africa

43  
44  
45  
46 Correspondence to Justine Davies: [J.Davies.6@bham.ac.uk](mailto:J.Davies.6@bham.ac.uk)

47  
48  
49 Author Contribution: JD, AL, TBK and HW conceptualised the study. MP, JD, and AL developed the  
50 protocol and survey tools; MP, JD, and CG analysed the data; all authors contributed to the  
51 interpretation of the results and write up of the manuscript; All authors approved the manuscript for  
52 publication.

53  
54 Competing interests: None declared.

55  
56 Funding: This research was partly funded by the National Institute of Health Research (NIHR) Global  
57 Health Research Unit on Health System Strengthening in Sub-Saharan Africa, King's College London  
58 (GHRU 16/136/54) using UK aid from the UK Government to support global health research. The  
59  
60

1  
2  
3 views expressed in this publication are those of the author(s) and not necessarily those of the NIHR  
4 or the Department of Health and Social Care.  
5

6 Data Sharing: Further data is available on reasonable request from the corresponding author.  
7

8 Patient and Public Involvement / Cohort Description: The Lancet Commission on Global Surgery has  
9 shown that out of pocket expenditure limits patients ability to access surgical care when needed.  
10 Accessing care for a surgically treatable disease to reduce mortality or morbidity is a priority for  
11 patients. The methodology employed was standard for assessing out of pocket costs, wealth, and  
12 healthcare expenditure. Patients were not involved in designing these methods, however, they were  
13 involved in testing and refining them to ensure appropriateness to a local setting. No patients were  
14 involved in the recruitment to and conduct of the study.  
15  
16

17  
18 As part of the ethics board approval, we did not collect contact details of the patients involved in this  
19 study and hence cannot disseminate the results to them. However, the results are being shared widely  
20 amongst policy workers, community leaders, and clinicians in Sierra Leone. The patient advocacy  
21 movement in Sierra Leone, like in many low-income countries, is nascent, hence there are no patient  
22 groups with which to share results. We hope that our work will galvanise greater advocacy and enable  
23 sharing more widely.  
24

25 We did not collect names of the six patients who helped to refine the data collection tool or ask their  
26 permission to be named. However, we have added a statement to the acknowledgements to  
27 generically acknowledge their contribution.  
28  
29

30 Acknowledgements: We thank the healthcare workers and patients who were involved in refining the  
31 data collection tool to ensure its applicability to a local setting.  
32  
33  
34  
35  
36  
37  
38  
39  
40  
41  
42  
43  
44  
45  
46  
47  
48  
49  
50  
51  
52  
53  
54  
55  
56  
57  
58  
59  
60

## Abstract

**Objectives:** To measure the financial burden associated with accessing surgical care in Sierra Leone.

**Design:** A cross-sectional survey conducted with patients at the time of discharge from tertiary level care. This captured demographics, yearly household expenditure, direct medical, direct non-medical, and indirect costs for surgical care, and summary household assets. Missing data were imputed.

**Setting:** The main tertiary level hospital in Freetown, Sierra Leone.

**Participants:** 335 surgical patients under the care of the hospital surgical team receiving operative or non-operative surgical care on the surgical wards.

**Outcome measures:** Rates of catastrophic expenditure (CE) (a cost > 10% of annual expenditure), impoverishment (being pushed into, or further into, poverty as a result of surgical care costs), amount of OOP costs, and means used to meet these costs were derived.

**Results:** Of 335 patients interviewed, 39.4% were female and 80.3% were urban dwellers. Median yearly household expenditure was US\$3569. Mean out-of-pocket costs were US\$243, of which a mean of US\$24 (10%) was spent pre-hospital. Of costs incurred during the hospital admission, direct medical costs were US\$138 (63%) and US\$34 (16%) were direct non-medical costs. US\$46 (21%) were indirect costs. Catastrophic expenditure affected 18% of those interviewed. 45% of patients were already below the national poverty line prior to admission, and 11% of those who were not were pushed below the poverty line following payment for surgical care. 83.7% of patients used household savings to meet OOP costs. Only 2% (6 patients) had health insurance.

**Conclusion:** Obtaining surgical care has substantial economic impacts on households which pushes them into poverty or further into poverty. The much-needed scaling up of surgical care needs to be accompanied by financial risk protection.

## Article Summary

### Strengths and Limitations

- Use of exit interviews to provide in depth data on costs of accessing surgical care.
- Thorough and detailed capture of household expenditure.
- Provides reliable estimates of OOP, catastrophic, and impoverishing expenditure as well as sources of financing.
- Data captured in one hospital only, although that is the major surgical care centre for the country.
- Only examines those who accessed care and doesn't allow exploration of costs as a limitation to accessing care.

## Introduction

An estimated 33 million individuals globally face financial catastrophe through payment for surgery and anaesthetic care each year. Furthermore 3-7 billion people have been estimated to be at risk of catastrophic expenditure (CE – defined as a total OOP health payment that exceeds a set threshold of the household's annual income or expenditure) due to a lack of financial risk protection (FRP).<sup>1,2</sup> Surgical conditions make up 30% of the global burden of disease and globally an additional 143 million surgical procedures are required annually to meet the current unmet surgical need.<sup>1,3</sup> To ensure universal health coverage, it is therefore essential that FRP is prioritised alongside the scaling up of surgical care. The Lancet Commission on Global Surgery (LCoGS) stated a target of 100% financial protection by 2030 for people accessing surgical care, and FRP indicators for surgery are now included within the World Development Indicators (WDI).<sup>4</sup> Despite this, there is little information on financial implications of accessing surgery in the literature beyond modelled studies,<sup>1,2,5</sup> many of which have been based on few real-world data-points.

Worldwide modelled data on CE and impoverishing expenditure (IE – defined as being pushed into or further into poverty) related to surgical care reveals that those most affected are individuals in low- and middle-income countries (LMICs).<sup>1,2,6</sup> Modelling studies from Sierra Leone, classed as “least developed” by the UN, and with a population of 7 million reflects these findings; between 84.7% and 49.9% of the population in Sierra Leone is estimated to be at risk of CE if they require surgery. Estimated average out-of-pocket (OOP) costs for major surgery in the country were US\$117.60, which put 73.3% to 59.2% of the population at risk of impoverishment.<sup>5,7</sup> However, there are no empirical data to validate these estimates. The estimated unmet surgical burden of disease in Sierra Leone is huge, at 92%, as a result of the historical neglect of surgical care both nationally and globally.<sup>8-10</sup> To enable effective planning of surgical services in future, an accurate understanding of the financial implications of accessing surgical services is required.

In Sierra Leone, as in many LMICs, payments for healthcare are upfront, complex, and not immediately apparent from hospital listed service charges. In addition, hospital listed charges – where they exist – may not reflect the total facility-incurred costs that patients pay during their hospitalisation. These include direct medical costs which are charges for the payment of medical care and direct non-medical costs which include items such as transport to the hospital and food. In addition, substantial costs of care may be incurred prior to the hospitalisation episode. For example, there may be direct medical costs at other healthcare facilities visited prior to the definitive admission. Finally, there are indirect costs (e.g. loss of wages whilst receiving care) that patients, and in some cases their caregivers, experience in their illness, which also impact upon ability to access care. Two ways of capturing these costs is the measurement of IE or CE. The two most widely used thresholds for CE are an expense of > 10% of total annual expenditure or > 40% of non-subsistence expenditure (i.e. household expenditure net of subsistence costs, as a means of capturing the ability to pay).<sup>11-14</sup>

This study aimed to measure the financial burden associated with receiving surgical care in Sierra Leone by using an exit survey to determine a) direct medical, direct non-medical, and indirect OOP costs to pay for a surgical care episode b) the rate of impoverishment and catastrophic expenditure, c) the wealth characteristics of the population accessing surgical care relative to that of the general Sierra Leonean population, d) the factors associated with higher costs of hospital care, e) the in-hospital payment mechanism (i.e. where and to whom the OOP payments are being made), and f) how costs of accessing surgical care are met, and the factors associated with meeting costs of care.

## Methods

### Setting

This study was done in the main tertiary referral centre in Sierra Leone, located in the central part of greater Freetown, and where the majority of surgical care in the countries' non charitable sector is done. It is a 400-bed hospital with 150 beds dedicated to surgical care. Surgical care is delivered in 5 of the 10 wards, an accident and emergency department with a trauma ward for short stay (< 24hrs) emergency surgical patients, a surgical outpatient unit, an intensive care unit and five operating theatres. The average surgical volume is 80 -100 operations per month.<sup>15</sup> The surgical department is run by 8 surgical and 2 anaesthetic consultants covering six specialities: general surgery, surgical oncology, urology, paediatrics, trauma and orthopaedics, and ear, nose and throat (ENT) surgery. Obstetric and gynaecological surgical care is delivered at a nearby tertiary referral hospital dedicated to women's health, where all pregnant and lactating women receive free healthcare under the government's free health care initiative and therefore not included in this study.

### Participants

Participants were all surgical patients who consented to take part, receiving operative or non-operative surgical care under the care of the hospital surgical team and located on one of the surgical wards. Patients under the care of non-surgical teams; patients under the age of 16 who were without a parent, guardian, or head of the household; and participants unable to consent and/or unwilling to take part in the study were excluded. Participants were recruited consecutively to the study on admission for surgical care from June to August 2018.

### Data collection

A structured questionnaire was administered to patients and/or their relatives at the time of formal discharge from surgical care while patients were on the ward. Where patients self-discharged or left against medical advice, where possible they were interviewed when leaving the hospital. Interviews were conducted in a private space and all participants were encouraged to bring a relative, head of the household, or the main breadwinner to allow for expenditure and OOP costs to be captured accurately.

The questionnaire was designed based on tools used in similar studies done in LMIC settings.<sup>16-19</sup> It was co-designed with in-country experts, healthcare professionals, and researchers to ensure that the questions were suitable for the Sierra Leone context. The questionnaire was pilot-tested for ease of comprehension, clarity of definitions, appropriateness of questions, and manageability of the length of the interview in six patients (who were excluded from the analysis). Minor modifications were made to the wording of the questions based on this, but the meaning of the questions was not changed. The questionnaire was designed and written in English and administered by trained Sierra Leonean research assistants (RAs) in either English or a chosen local dialect (most commonly Krio). Data was captured on paper and later transferred to electronic format.

### Definition and construction of variables

Data was collected on the participants' age, gender and address (later used to calculate if they were resident in an urban or rural area). The occupation of the main breadwinner was recorded using free text followed by a question on whether this was salaried (i.e. employed) or non-salaried (i.e. self-employed or working in the informal sector). Education was captured as the highest level of education of the main breadwinner. Information on household expenditure was captured by asking 7 questions on regular items purchased in a typical week (food and drink etc.), 11 questions on larger expenditure items typically purchased monthly (toiletries, clothing, etc.) and a further 12 questions on typical yearly spend on big household items such as furniture and livestock (see Appendix 6). Total food expenditure ( $foodexp_h$ ) was summed as a separate variable for the purposes of calculating CE (where food expenditure was used to define subsistence costs). Number of people living in the household ( $HHsize$ ) was also captured, as was the number of days of sickness before presentation, whether care

had been sought elsewhere prior to presentation at Connaught Hospital, and the mode of transport used.

Data was also collected on the following: whether the patient was an emergency or elective case; whether or not the participant was eligible for free healthcare (for patients under the age of 5 years old, pregnant or lactating mothers, Ebola survivors, destitute and disabled patients); and the primary diagnosis, recorded from review of the patient's admission notes, ward and theatre ledgers (later summarised into 10 categories of surgical conditions: trauma, hernia, abdominal conditions, peripheral vascular disease or diabetic foot disease, urological conditions, breast mass / cancer, burns, ENT / dental disease, thyroid, congenital abnormality, or paediatrics. Treatment was categorised as operative or non-operative following review of the patient's admission notes. Length of hospital stay was also calculated.

Direct medical OOP costs were captured across the entire illness episode including in-hospital costs (from the point of admission to discharge from the tertiary care hospital) and pre-hospital costs (for other medical costs related to the admission episode which occurred prior to the tertiary care admission). In-hospital direct medical costs were the sum of administrative costs (including registration, admission, triage, bed and discharge fees), medications, medical supplies, investigations, blood transfusion, operation cost, and informal payments (defined as any payment that was not part of hospital policy, such as doctors' fees, tips, payments made to porters and to nursing staff for nursing care). If costs were 'formal', we asked whether these costs were paid directly to the hospital bank / cashiers directly or via hospital staff, or to an external facility (such as external pharmacy or laboratory). For pre-hospital care, non-medical direct costs were calculated from transport costs. For the hospital episode, non-medical direct costs were captured as: cost of transport to the hospital or to and from the hospital to get food, medical supplies and investigations from external facilities, and the cost of food and accommodation during the hospital stay. Finally, indirect costs were captured by estimating lost wages during the illness episode.

All costs are presented in Le and \$US at the conversion rate of 15<sup>th</sup> July 2019 (1 Sierra Leonean Leone = 0.00011567 USD).

Total household expenditure ( $total_{exp_h}$ ) was calculated over the course of 12 months by summing all the variables collected on all regular household items purchased as described above.

*Total OOP payments for surgical care ( $OOP_t$ ): = total direct medical costs + total direct non-medical costs + total indirect costs*

Catastrophic expenditure (CE) is most widely defined as either an expense of more than 40% of non-subsistence expenditure (i.e. household expenditure net of subsistence [here, food ( $food_{exp_h}$ )] costs) or an expense more than 10% of total annual expenditure. We used both of these definitions in our calculations.

CE was therefore present if:  $\frac{OOP_t}{total_{exp} - food_{exp_h}} > 0.4$

Or if:  $\frac{OOP_t}{total_{exp}} > 0.1$

Impoverishing Expenditure (IE) is defined as being pushed into or further into poverty. The Sierra Leone national poverty line (spending < \$1.25/person /day) threshold was used for the main analysis. In addition, two further thresholds for poverty were used based on World Bank definitions: "poverty"

- spending < \$3.10/person/day and “extreme poverty” - spending < \$1.90/person/day.<sup>4</sup> Presence of poverty before (baseline) and after OOP spending on surgical care were then calculated.

Baseline poverty ( $BLP_h$ ) at each threshold was determined to be present if total household expenditure ( $totalexp_h$ ) per individual inhabiting each household divided by the number of days in the year was

below the poverty threshold chosen. i.e.:  $\frac{\left(\frac{totalexp_h}{HHsize}\right)}{365} \leq poverty\ line$

Impoverishment as a result of surgical care was defined as present if the total household expenditure net the total OOP costs for surgical care ( $totalexp_{netsurg} = totalexp_h - OOP_t$ ) per head of household, per day was less than the chosen poverty threshold

i.e.: IE present if  $\frac{\left(\frac{totalexp_{netsurg}}{HHsize}\right)}{365} \leq poverty\ line$

Both CE and IE are presented as the number and percentage of participants who experienced CE and or IE.

Summary household asset data was collected using a yes or no response to the ownership of the following assets: Electricity / Light, Mobile phone, Radio, Television, Computer, Refrigerator, Generator, Bicycle, Motorcycle and Car or truck.

### Sample size and power calculation

Based on a similar study done in Uganda which estimated CE to be 31%<sup>16</sup> in a free healthcare setting, modelled and World Bank data for Sierra Leone which estimates CE at 84.7% and 49.9% respectively, and from discussion with academics with in-country knowledge, we estimated that CE would be around 60% of patients admitted for surgical care. The sample size required to capture this with a CI of 55-65%, allowing for 10% loss to follow up was 442 patients.

### Statistical analysis

Statistical analysis was done using SPSS Version 25 for windows.

Characteristics of the population seeking care are described. Normally distributed data are presented as mean and standard deviation (SD), otherwise median, IQR and range are used. Multiple Imputation Chained Equations were used to compute missing data-points using predictive mean matching for variables with less than 20% missingness and where missingness was identified as not at random. Where imputed variables were used, the pooled mean is shown as standard SPSS output. A complete case analysis was done for variables describing how costs of accessing care were met and the consequences of accessing care.

Wealth characteristics (household asset ownership) of the population accessing surgical care were compared with those in the general population (2015 Census data<sup>20</sup>) using the Chi squared test.

Associations between direct medical in-hospital OOP costs of care and age, sex, type of admission (emergency or elective), operative or non-operative care, type of operative procedure, or length of stay were tested using a generalised linear model using a Tweedie function with a power of 1.9.

### Ethical approval

Ethical approval was granted by the Sierra Leone Ethics and Scientific Review Committee and from the King's College London Research Ethics Committee (ref. LRU-17/18-6455)



All patients gave written consent to participate where possible and witnessed thumbprints and verbal consent where patients were illiterate. Patients were given information about the study at admission and consented between 4-24 hours later after due time was given to consider the study information. Consent was re-confirmed just prior to doing the exit interview.

## Results

Of the initial 416 recruited participants, a total of 335 were interviewed (Figure 1). Participant characteristics are presented in table 1. In summary, the mean age of the interviewed patients was 28 (SD 20). 39.4% were female and 80.3% lived in an urban area. 29% were formally employed with a further 66.9% being employed but without a regular salary – either self-employed or employed within the informal sector. The level of education of the main breadwinner was secondary school in 37.9%, college / university in 28% and no formal education in 23.6%. The median household size was 6 (IQR: 4, range: 4-8) with a mean total yearly household expenditure of US\$3569 (see appendix table 1 for imputed and non-imputed data and appendix table 2 for a comparison with expenditure assessed in the Economic and Financial survey in 2014<sup>21</sup>). 67.2% of participants had sought care for their illness elsewhere prior to presentation at the tertiary referral hospital. 71.9% arrived by public transport and the majority were classed as emergency admissions (72.2%). The most common reasons for presentation were trauma, hernia, or other abdominal conditions. 67.5% underwent operative intervention with the remainder being managed by non-operative measures. Median length of stay was 8 days (IQR: 18, range: 3-21).

**Table 1: Participant characteristics**

| <b>Demographics of participants</b>                                              |                |
|----------------------------------------------------------------------------------|----------------|
| Total number of patients interviewed                                             | 335            |
| Mean age in years (SD)                                                           | 28 (20)        |
| Female number (%)                                                                | 132 (39.4%)    |
| Urban Residents (%)                                                              | 269 (80.3%)    |
| <b>Type of job (number (%)):</b>                                                 |                |
| Self Employed / Informal Sector                                                  | 224 (66.9%)    |
| Employed                                                                         | 97 (29%)       |
| Unemployed / Retired                                                             | 12 (3.6%)      |
| Missing / Don't know                                                             | 2 (0.6%)       |
| <b>Level of education of main breadwinner (number (%)):</b>                      |                |
| No formal education                                                              | 79 (23.6%)     |
| Primary school                                                                   | 25 (7.5%)      |
| Secondary school                                                                 | 127 (37.9%)    |
| College / University                                                             | 94 (28%)       |
| Other / Missing / Don't know                                                     | 10 (3.0%)      |
| Median household size (IQR, (range))                                             | 6 (4, (4-8))   |
| Total yearly household expenditure (US\$)                                        | \$ 3,569       |
| Number below national poverty line prior to illness                              | 151 (45%)      |
| <b>Surgical Care Episode Descriptors</b>                                         |                |
| Median days of sickness before presentation (IQR, (range))                       | 2 (14, (0-14)) |
| Number that sought care for illness elsewhere prior to presentation at Connaught | 225 (67.2%)    |
| <b>Mode of transport used to travel to hospital (number (%)):</b>                |                |
| Public transport                                                                 | 241 (71.9%)    |
| Ambulance                                                                        | 67 (20%)       |
|                                                                                  | 23 (6.9%)      |

|                                                             |                |
|-------------------------------------------------------------|----------------|
| Private transport                                           | 3 (0.9%)       |
| Walked                                                      | 1 (0.3%)       |
| Don't know / Missing                                        |                |
| Emergency admission (%)                                     | 242 (72.2%)    |
| Eligible for free health care (%)*                          | 70 (20.9%)     |
| <b>Primary diagnosis by surgical condition (number (%))</b> |                |
| Trauma                                                      | 114 (34%)      |
| Hernia                                                      | 58 (17.3%)     |
| Abdominal conditions                                        | 56 (16.7%)     |
| Peripheral vascular disease or diabetic foot disease        | 27 (8.1%)      |
| Urological conditions                                       | 23 (6.9%)      |
| Breast mass / cancer                                        | 16 (4.8%)      |
| Burns                                                       | 15 (4.5%)      |
| ENT / dental disease                                        | 13 (3.9%)      |
| Goitre                                                      | 7 (2.1)        |
| Congenital abnormality (paediatrics)                        | 3 (0.9%)       |
| Missing / don't know                                        | 3 (0.9%)       |
| <b>Treatment (number (%)):</b>                              |                |
| Operative                                                   | 226 (67.5%)    |
| Non-operative                                               | 109 (32.5%)    |
| Median length of hospital stay (LOS) in days (IQR, (range)) | 8 (18, (3-21)) |

\* Eligible for free health care indicates those that fall under the government Free Health Care Initiative (FHCI); a health financing policy introduced in 2010 aimed to significantly improve maternal and child health through the provision of free healthcare services for all children under 5, pregnant and lactating women. This was later extended to include Ebola survivors.

The total mean cost for the surgical care episode was US\$243 of which US\$24 (10%) accounted for pre-hospital direct costs (medical costs were US\$21 and non-medical were US\$3). Of the in-hospital direct costs (mean US\$172), a mean of US\$138 (63%) was due to direct medical costs and US\$34 (16%) for direct non-medical costs. Indirect costs, such as lost wages, totalled US\$46. (Table 2 and appendix table 3).

**Table 2: Out-of-pocket costs.**

| Costs                                                      | Imputed mean cost (\$US (% of subtotal)) |
|------------------------------------------------------------|------------------------------------------|
| <b>Prehospital costs</b>                                   |                                          |
| <b>Direct pre-hospital medical OOP costs (total)</b>       | <b>21 (88% of 24)</b>                    |
| - Consultation                                             | 2 (10% of 21)                            |
| - Medications                                              | 12 (57% of 21)                           |
| - Medical supplies                                         | 2 (10% of 21)                            |
| - Investigations                                           | 4 (19% of 21)                            |
| - Other miscellaneous                                      | 2 (10% of 21)                            |
| <b>Direct (pre-hospital) non-medical OOP costs (total)</b> | <b>3 (13% of 24)</b>                     |
| - Transport                                                | 3 (100% of 3)                            |
| <b>Total pre-hospital costs</b>                            | <b>24 (10% of 243)</b>                   |
| <b>In hospital costs</b>                                   |                                          |
| <b>Direct medical OOP costs (total)</b>                    | <b>138 (63% of 219)</b>                  |
| - Administrative                                           | 20 (14% of 138)                          |

|                                         |                        |
|-----------------------------------------|------------------------|
| - Medications                           | 26 (19% of 138)        |
| - Medical supplies                      | 14 (10% of 138)        |
| - Investigations                        | 15 (11% of 138)        |
| - Blood transfusion                     | 9 (7% of 138)          |
| - Total operation costs                 | 49 (36% of 138)        |
| - Unofficial costs                      | 6 (4% of 138)          |
| - Other / miscellaneous                 | 1 (1% of 138)          |
| <b>Direct non-medical costs (total)</b> | <b>34 (16% of 219)</b> |
| - Transport to hospital                 | 7 (21% of 34)          |
| - Food                                  | 20 (59% of 34)         |
| - Accommodation                         | 0 (0% of 34)           |
| - Other*                                | 7 (21% of 34)          |
| <b>Indirect costs</b>                   |                        |
| - Lost wages                            | 46 (100% of 46)        |
| <b>TOTAL OOP COSTS</b>                  | <b>243</b>             |

\*other relates to travel and other associated costs incurred as a result for needed investigations from and or medication / supplies from an external facility. SPSS calculates only the mean using imputed variables, hence no standard deviation is displayed.

Of the in-hospital direct medical costs, 48% were given to hospital staff (it was not clear whether the hospital staff later transferred these funds to the hospital bank or not), 33% were made directly to the hospital bank / cashiers and 17% to an external facility such as external pharmacy or diagnostic centre (Appendix table 4).

A variety of means were used to meet costs and participants were allowed to mention more than one means of covering costs (Table 3). Most (83.7% of patients) used their savings to meet some or all of the costs, with family contributions, borrowing money and charitable donations forming the 2<sup>nd</sup>, 3<sup>rd</sup> and 4<sup>th</sup> most frequently used means of meeting OOP payments, respectively. Only 2% (6 patients) had some form of health insurance. Wider implications included loss of wages in 36.9% and loss of job in 6.0%.

**Table 3: How costs are met and the wider implications of seeking and undergoing surgical care (n is the number of cases with data on each variable)**

| How costs were met (total number responding to question)            | Number (%) that used this as a means of meet OOP costs                  |
|---------------------------------------------------------------------|-------------------------------------------------------------------------|
| Used <b>Savings</b> (n=326)                                         | <b>273 (83.7%)</b>                                                      |
| Arranged <b>family contributions</b> (n=331)                        | <b>128 (38.7%)</b>                                                      |
| <b>Borrowed</b> money (n=331)                                       | <b>102 (30.8%)</b>                                                      |
| Received <b>charity</b> money (n = 331)                             | <b>83 (25.3%)</b>                                                       |
| <b>Sold possessions</b> (n=329)                                     | <b>17 (5.2%)</b>                                                        |
| <b>Other</b> (n=331)                                                | <b>14 (4.2%)</b>                                                        |
| <b>Pawned</b> possessions (n=332)                                   | <b>8 (2.4%)</b>                                                         |
| Have <b>Health insurance</b> (n=335)                                | <b>6 (1.8%)</b>                                                         |
| Wider implications                                                  | Number (%) that experienced the wider implications of meeting OOP costs |
| <b>Loss of wages</b> (n = 328)                                      | <b>121 (36.9%)</b>                                                      |
| <b>Lost their job</b> / changed their role at work / home (n = 331) | <b>20 (6.0%)</b>                                                        |
| <b>Disruption to education</b> (n = 333)                            | <b>12 (3.6%)</b>                                                        |

Catastrophic expenditure, when defined as OOP costs of more than 40% of non-subsistence expenditure affected 10% of those interviewed, rising to 18% when defined as out-of-pocket costs more than 10% of all household expenditure.

Prior to the surgical care episode, 45% of people interviewed were below the national poverty line, 90% were below the World Bank Poverty Level, and 70% below the World Bank Extreme Poverty level. Following payment for surgical care, 50% were pushed below or further below the national poverty line. Corresponding figures were 91% and 73%, for the World Bank thresholds of poverty and extreme poverty, respectively.

Analysis of the possession of household assets demonstrated that those interviewed were more likely to have electricity, a mobile phone, radio, television, refrigerator, bicycle, motorcycle or car than those of the general population in Sierra Leone (2015 Census data, all  $p < 0.001$ ) or of the urban population in the Western Area (2015 Census data, all  $p < 0.05$ ) (Table 4).

Regression analysis demonstrated that the factors associated with greater costs were older age, longer length of hospital stay and undergoing a general surgical or urological procedure (Appendix table 5).

### Discussion

In this study, we found that accessing and receiving tertiary level surgical care in Sierra Leone requires large up-front OOP payments which have a substantial impact on individual and households' economic situations. These equate to a catastrophic expense in nearly a fifth of households and are impoverishing half of the households that receive care. We found poverty, as assessed by household expenditure, was high indicating a limited financial buffer to accommodate costs of care. This is despite most people who access surgical care owning a higher level of assets than the general population.

The majority of the OOP payments were incurred in-hospital and as a result of direct medical costs. Payment for the operation itself and medications, medical supplies, and investigations (including laboratory tests) were the biggest contribution to these costs. A small percentage of costs were categorised as unofficial, such as for "nursing care" and "tips", although these were given by a majority of people who received care. In addition, in enquiring about the payment routes for formal costs, we identified that almost half of these were being paid through unofficial payment channels and made directly to staff. We do not know whether these payments were later transferred by staff to the hospital bank, however, that these informal routes are common and indicate poor financial governance which urgently needs to be addressed.

Assessment of the wider implications of seeking surgical care in Sierra Leone highlighted that the majority of payments were met using savings, followed by raising money from family contributions or borrowing money which may leave households in debt. In addition, a large number of participants lost wages during the sickness episode and a proportion lost their jobs. In a country where informal work predominates and earnings can be unpredictable, this may impact on household financial security and influence future health seeking behaviour, both of the individuals affected and their immediate family and communities.

The majority of patients accessing surgical care were young males; whether this male predominance is a true reflection of surgical disease burden, beyond obstetrics and gynaecological care, in Sierra Leone or reveals a hidden gender bias in care seeking behaviour is beyond the remit of this study. Nevertheless, males who sought care in our study are traditionally the main breadwinners and the most economically active population group in Sierra Leone. This loss of wages and livelihood could have implications on the wider socio-economic determinants of health and the well-being of the household. The additional burden to the patients and their households as a result of the indirect costs supports the macroeconomic argument for investing in surgical care put forward by Grimes et al, who demonstrated the opportunity to avert 36,487 DALYs by investing in surgical care at hospital level in Sierra Leone.<sup>22,23</sup>

Some specialties, such as general surgery and urology incurred much higher overall costs for the surgical episode and this may be because operative intervention (with blood transfusion and a longer length of stay) is usually required. This contrasts for example, to trauma care that was often managed non-operatively. Such non-operative treatment for trauma may be partly as a result of local surgical practice, often driven by lack of resources such as the unavailability of internal fixation wires and orthopaedic implants, and partly because some common orthopaedic problems are managed non-operatively. In addition, we found that age and length of hospital stay were associated with significantly higher costs. This may be due to the fact that those under the age of 5 years were eligible for free health care in Sierra Leone and that a longer stay in hospital was associated with higher direct non-medical and indirect costs such as payment for food and lost wages.

There are a limited number of studies to draw a direct comparison with as only a few used a similar methodology (direct interview) as opposed to modelled data or the use of caesarean section costs as

1  
2  
3 a proxy measure to extrapolate costs, CE and impoverishment.<sup>2,16,24-29</sup> There are even fewer studies  
4 that report on the financial implications of all or most types of surgical care. The majority report on  
5 single surgical subspecialties such as obstetric care, paediatric surgery or trauma care. Nevertheless,  
6 there have been three recent studies from Uganda reporting CE rates of 31% and IE of 47% (assessing  
7 all surgical categories), CE of 55% (in adult surgery only) and 45% (in paediatric surgery).<sup>16,30,31</sup> A study  
8 in Malawi interviewing patients undergoing hernia operations reported CE rates as high as 90% using  
9 a threshold of 10% of yearly income.<sup>27</sup> Various studies looking at injury and trauma care costs in  
10 Vietnam, India and Nigeria have reported CE rates of 60%, 30% and 86% respectively<sup>24</sup> and a study in  
11 Morocco looking at obstetric surgical care alone estimated CE rates of 88%<sup>32</sup> while an emergency  
12 obstetric care study in Indonesia estimated CE at 68%.<sup>33</sup> This highlights the inter-country variability  
13 and although that makes it difficult to draw comparative conclusions, our study results relate closest  
14 to the Ugandan study that assessed all surgical categories using a similar methodology and thresholds.  
15 This highlights the need for a standardised way of assessing and measuring the financial implications  
16 of surgical care, to allow accurate collection and reporting of these global surgery metrics on financial  
17 risk protection.  
18  
19

20  
21 In keeping with other studies, we noted lower rates of CE and IE in comparison to the modelled and  
22 extrapolated estimates for Sierra Leone. This is probably because the modelled studies are based on  
23 the whole population that may require surgery and not on those that have successfully accessed  
24 surgical care. The lower rates of IE and CE seen may therefore be explained by a lack of access by the  
25 poorest. This is supported by data from Sierra Leone that estimates that up to 25% of deaths in 2011  
26 could have been averted through access to safe, timely and affordable surgical care and that Sierra  
27 Leone has an unmet surgical burden of disease of 92%<sup>10</sup>, with approximately 70% of Sierra Leoneans  
28 stating that the financial burden of OOP payments for healthcare was the biggest barrier to accessing  
29 care.<sup>34,35</sup> In addition, we found that those accessing tertiary level surgical care came from  
30 predominantly urban areas of Sierra Leone and when compared to the wider Sierra Leone population,  
31 had significantly higher asset ownership. Using the latter as a proxy of wealth or socio-economic  
32 status, this could indicate that those able to access and receive surgical care represent the relatively  
33 wealthier households of Sierra Leone and therefore that the poorest and those at the highest risk of  
34 financial catastrophe are not accessing care when needed. This may also reflect other known barriers  
35 to seeking surgical care in LMICs that are often complex and multifactorial such as cultural beliefs,  
36 attitudes and fears towards surgical care and structural barriers such as geographical access, transport  
37 links and referral systems.<sup>36</sup>  
38  
39  
40

#### 41 **Limitations**

42 There are several limitations to this study. Firstly, it was dependant on recall and self-reported  
43 estimates of OOP costs and household expenditure. Although the questionnaire and methodology are  
44 a well-established way of obtaining this information in a low-resource setting where informal work  
45 predominates and payments are not often receipted, the data is still subject to respondent and recall  
46 bias. This may have contributed to missing data or the underestimation of OOP costs and possible  
47 overestimation of household expenditure which is also subject to social desirability bias.  
48  
49

50 Attempts made to minimise this included breaking down household expenditure questions to weekly,  
51 monthly and yearly costs, using a chronological approach to the OOP cost questions that helped map  
52 out the patients journey for them, encouraging participants to bring an appropriate family member  
53 to the interview, and by gaining in-country consensus and piloting the questionnaire prior to use.  
54  
55

56 Whilst attempts were made to ensure another family member or respondent was available during the  
57 interview to assist with accuracy, this was not always possible. In addition, given the reliance on  
58 savings, borrowed money and family contributions, payments were often made without the  
59 knowledge of the patient and were therefore difficult to reliably collect. As a result, the data was  
60

1  
2  
3 handled using an established statistical approach that aimed to accurately account for the missing  
4 values. Further comparison between non-imputed and imputed data was performed which showed  
5 minimal disparity suggesting reliability of this method (see Appendix).  
6

7  
8 Secondly, given that patients were often interviewed on the wards and potentially within hearing  
9 range of nurses, data on informal payment methods and informal costs, may not have been fully  
10 reported. With this in mind we would have expected to see more missing data for the variable  
11 payments made directly to staff in comparison to those made to the banks, however we did not  
12 observe this. This indicates that participants were not deterred from sharing information on informal  
13 payments within the in-hospital study setting.  
14

15  
16 Thirdly, the study only measures costs incurred during the illness episode up until discharge and  
17 therefore does not capture the indirect costs if patients are off work or do not return back to work  
18 following discharge or the costs of ongoing outpatient or follow-up care, medications and medical  
19 supplies. We have therefore likely substantially underestimated the total costs of seeking surgical  
20 care.  
21

22  
23 In addition, Sierra Leone tertiary level obstetric care is provided at a different hospital and offered  
24 free of charge. Therefore, costs of accessing this were not included in this study. Further work needs  
25 to be done to see if those receiving free maternal healthcare incur any OOP costs and if informal  
26 payments such as tips paid to staff are as prevalent in the obstetric care hospital.  
27

28  
29 Finally, the desired sample size was not achieved as not all surgical patients admitted were  
30 interviewed. This was mostly due to many being discharged out of hours, at the weekend or after a  
31 short admission on the acute trauma ward, before the study team could consent or interview them.  
32 With regards to the later this may indicate minor pathology, a shorter stay and therefore lower OOP  
33 costs. Inclusion of these cases may have lowered the mean OOP costs, CE and IE rates but would  
34 poorly represent the financial barriers and wider implications of accessing surgical care for those that  
35 may have absconded or self-discharged due the cost of care. Nevertheless, although sample size was  
36 not obtained, the 95% confidence interval for a catastrophic expenditure rate of 18% was 14-22%  
37 which gives the study an overall power of 90%.  
38

### 39 **Conclusion**

40 This is the first empirical study from Sierra Leone that quantifies the financial burden of accessing and  
41 receiving surgical care. It adds insight into the global and national Sierra Leone modelled estimates of  
42 the likelihood of catastrophic and impoverishing expenditure if surgery is required and joins the small  
43 but growing body of other empirical studies reporting on the OOP costs and wider financial  
44 implications of surgical care. In addition, it highlights the need to prioritise financial risk protection  
45 within healthcare and surgery if universal health coverage is to be achieved.  
46  
47  
48  
49  
50  
51  
52  
53  
54

### 55 **References**

- 56  
57  
58 1. Meara JG, Leather AJ, Hagander L, et al. Global Surgery 2030: evidence and solutions for achieving  
59 health, welfare, and economic development. *Lancet* 2015; **386**(9993): 569-624.  
60

2. Shrime MG, Dare AJ, Alkire BC, O'Neill K, Meara JG. Catastrophic expenditure to pay for surgery worldwide: a modelling study. *Lancet Glob Health* 2015; **3 Suppl 2**: S38-44.
3. Shrime MG, Bickler SW, Alkire BC, Mock C. Global burden of surgical disease: an estimation from the provider perspective. *Lancet Glob Health* 2015; **3 Suppl 2**: S8-9.
4. World Bank Development Indicators 2016. <http://data.worldbank.org/data-catalog/world-development-indicators> (accessed 10th August 2018).
5. Shrime MG, Dare A, Alkire BC, Meara JG. A global country-level comparison of the financial burden of surgery. *Br J Surg* 2016; **103**(11): 1453-61.
6. WHO. World Health Organisation: Health statistics and information systems. Global Reference List of 100 Core Health Indicators. . 2015. <http://www.who.int/healthinfo/indicators/2015/en/>
7. World Bank: Risk of catastrophic expenditure for surgical care. Sierra Leone <https://data.worldbank.org/indicator/SH.SGR.CRSK.ZS?locations=SL>.
8. Farmer PE, Kim JY. Surgery and global health: a view from beyond the OR. *World J Surg* 2008; **32**(4): 533-6.
9. Bolkan HA, Von Schreeb J, Samai MM, et al. Met and unmet needs for surgery in Sierra Leone: A comprehensive, retrospective, countrywide survey from all health care facilities performing operations in 2012. *Surgery* 2015; **157**(6): 992-1001.
10. Groen RS, Samai M, Stewart KA, et al. Untreated surgical conditions in Sierra Leone: a cluster randomised, cross-sectional, countrywide survey. *Lancet* 2012; **380**(9847): 1082-7.
11. Hsu J, Flores G, Evans D, Mills A, Hanson K. Measuring financial protection against catastrophic health expenditures: methodological challenges for global monitoring. *Int J Equity Health* 2018; **17**(1): 69.
12. Xu K, Evans DB, Carrin G, Aguilar-Rivera AM, Musgrove P, Evans T. Protecting households from catastrophic health spending. *Health Aff (Millwood)* 2007; **26**(4): 972-83.
13. Hoang HT, Pham TL, Vo TT, Nguyen PK, Doran CM, Hill PS. The costs of traumatic brain injury due to motorcycle accidents in Hanoi, Vietnam. *Cost Eff Resour Alloc* 2008; **6**: 17.
14. Nguyen H, Ivers R, Jan S, Martiniuk A, Pham C. Catastrophic household costs due to injury in Vietnam. *Injury* 2013; **44**(5): 684-90.
15. National Surgical, Obstetric and Anaesthesia Strategic Plan. Sierra Leone Ministry of Health and Sanitation.
16. Anderson GA, Ilcisin L, Kayima P, et al. Out-of-pocket payment for surgery in Uganda: The rate of impoverishing and catastrophic expenditure at a government hospital. *PLoS One* 2017; **12**(10): e0187293.
17. World Health Organisation. Health statistics and information systems. Data collection tools - World Health Survey. . <http://www.who.int/healthinfo/survey/en/> (accessed 19th April 2018).
18. (SAGE). WHOHsaisDct-WSOGAAAH. <http://www.who.int/healthinfo/sage/en/>
19. Grimes CE, Billingsley ML, Dare AJ, et al. The demographics of patients affected by surgical disease in district hospitals in two sub-Saharan African countries: a retrospective descriptive analysis. *Springerplus* 2015; **4**: 750.
20. 2015 Population and House Census: Summary of Final Results. . [https://www.statistics.sl/images/StatisticsSL/Documents/final-results-2015\\_population\\_and\\_housing\\_census.pdf](https://www.statistics.sl/images/StatisticsSL/Documents/final-results-2015_population_and_housing_census.pdf). Accessed 21st August 2019. .
21. Economic and Financial Survey 2014. . [https://www.statistics.sl/images/StatisticsSL/Documents/Publications/2014/economic\\_and\\_financial\\_survey\\_2014\\_2.pdf](https://www.statistics.sl/images/StatisticsSL/Documents/Publications/2014/economic_and_financial_survey_2014_2.pdf) (accessed 20th June 2019)
22. Grimes CE, Quaife M, Kamara TB, Lavy CBD, Leather AJM, Bolkan HA. Macroeconomic costs of the unmet burden of surgical disease in Sierra Leone: a retrospective economic analysis. *BMJ Open* 2018; **8**(3): e017824.
23. Grimes CE, Law R, Dare A, et al. Cost-Effectiveness of Two Government District Hospitals in Sub-Saharan Africa. *World J Surg* 2017; **41**(9): 2187-92.
24. Nguyen H, Ivers R, Jan S, Pham C. Cost of surgery and catastrophic expenditure in people admitted to hospital for injuries: estimates from a cohort study in Vietnam. *Lancet* 2015; **385 Suppl 2**: S50.
25. Prinja S, Bahuguna P, Gupta R, Sharma A, Rana SK, Kumar R. Coverage and Financial Risk Protection for Institutional Delivery: How Universal Is Provision of Maternal Health Care in India? *PLoS One* 2015; **10**(9): e0137315.
26. Honda A, Randaoharison PG, Matsui M. Affordability of emergency obstetric and neonatal care at public hospitals in Madagascar. *Reprod Health Matters* 2011; **19**(37): 10-20.



- 1  
2  
3 27. Bijlmakers L, Wientjes M, Mwapasa G, et al. Out-of-pocket payments and catastrophic household  
4 expenditure to access essential surgery in Malawi - A cross-sectional patient survey. *Ann Med Surg (Lond)*  
5 2019; **43**: 85-90.
- 6 28. Banu T, Chowdhury TK, Aziz TT, et al. Cost Incurred by the Family for Surgery in Their Children: A  
7 Bangladesh Perspective. *World J Surg* 2018; **42**(12): 3841-8.
- 8 29. Urua U, Osungbade K, Obembe T, Adeniji F. A cost analysis of road traffic injuries in a tertiary hospital  
9 in south-west Nigeria. *Int J Inj Contr Saf Promot* 2017; **24**(4): 510-8.
- 10 30. MacKinnon N, St-Louis E, Yousef Y, Situma M, Poenaru D. Out-of-Pocket and Catastrophic Expenses  
11 Incurred by Seeking Pediatric and Adult Surgical Care at a Public, Tertiary Care Centre in Uganda. *World J Surg*  
12 2018; **42**(11): 3520-7.
- 13 31. Yap A, Cheung M, Kakembo N, et al. From Procedure to Poverty: Out-of-Pocket and Catastrophic  
14 Expenditure for Pediatric Surgery in Uganda. *J Surg Res* 2018; **232**: 484-91.
- 15 32. Boukhalifa C, Abouchadi S, Cunden N, Witter S. The free delivery and caesarean policy in Morocco:  
16 how much do households still pay? *Trop Med Int Health* 2016; **21**(2): 245-52.
- 17 33. Quayyum Z, Nadjib M, Ensor T, Suchaya PK. Expenditure on obstetric care and the protective effect of  
18 insurance on the poor: lessons from two Indonesian districts. *Health Policy Plan* 2010; **25**(3): 237-47.
- 19 34. Ponsar F, Tayler-Smith K, Philips M, et al. No cash, no care: how user fees endanger health—lessons  
20 learnt regarding financial barriers to healthcare services in Burundi, Sierra Leone, Democratic Republic of  
21 Congo, Chad, Haiti and Mali. *Int Health* 2011; **3**(2): 91-100.
- 22 35. Xu K, Evans DB, Kawabata K, Zeramdini R, Klavus J, Murray CJ. Household catastrophic health  
23 expenditure: a multicountry analysis. *Lancet* 2003; **362**(9378): 111-7.
- 24 36. Grimes CE, Bowman KG, Dodgion CM, Lavy CB. Systematic review of barriers to surgical care in low-  
25 income and middle-income countries. *World J Surg* 2011; **35**(5): 941-50.
- 26  
27  
28  
29  
30  
31  
32  
33  
34  
35  
36  
37  
38  
39  
40  
41  
42  
43  
44  
45  
46  
47  
48  
49  
50  
51  
52  
53  
54  
55  
56  
57  
58  
59  
60

1  
2  
3  
4  
5  
6  
7  
8  
9  
10  
11  
12  
13  
14  
15  
16  
17  
18  
19  
20  
21  
22  
23  
24  
25  
26  
27  
28  
29  
30  
31  
32  
33  
34  
35  
36  
37  
38  
39  
40  
41  
42  
43  
44  
45  
46  
47  
48  
49  
50  
51  
52  
53  
54  
55  
56  
57  
58  
59  
60

For peer review only

1  
2  
3  
4  
5  
6  
7  
8  
9  
10  
11  
12  
13  
14  
15  
16  
17  
18  
19  
20  
21  
22  
23  
24  
25  
26  
27  
28  
29  
30  
31  
32  
33  
34  
35  
36  
37  
38  
39  
40  
41  
42  
43  
44  
45  
46  
47  
48  
49  
50  
51  
52  
53  
54  
55  
56  
57  
58  
59  
60

For peer review only

Figure 1

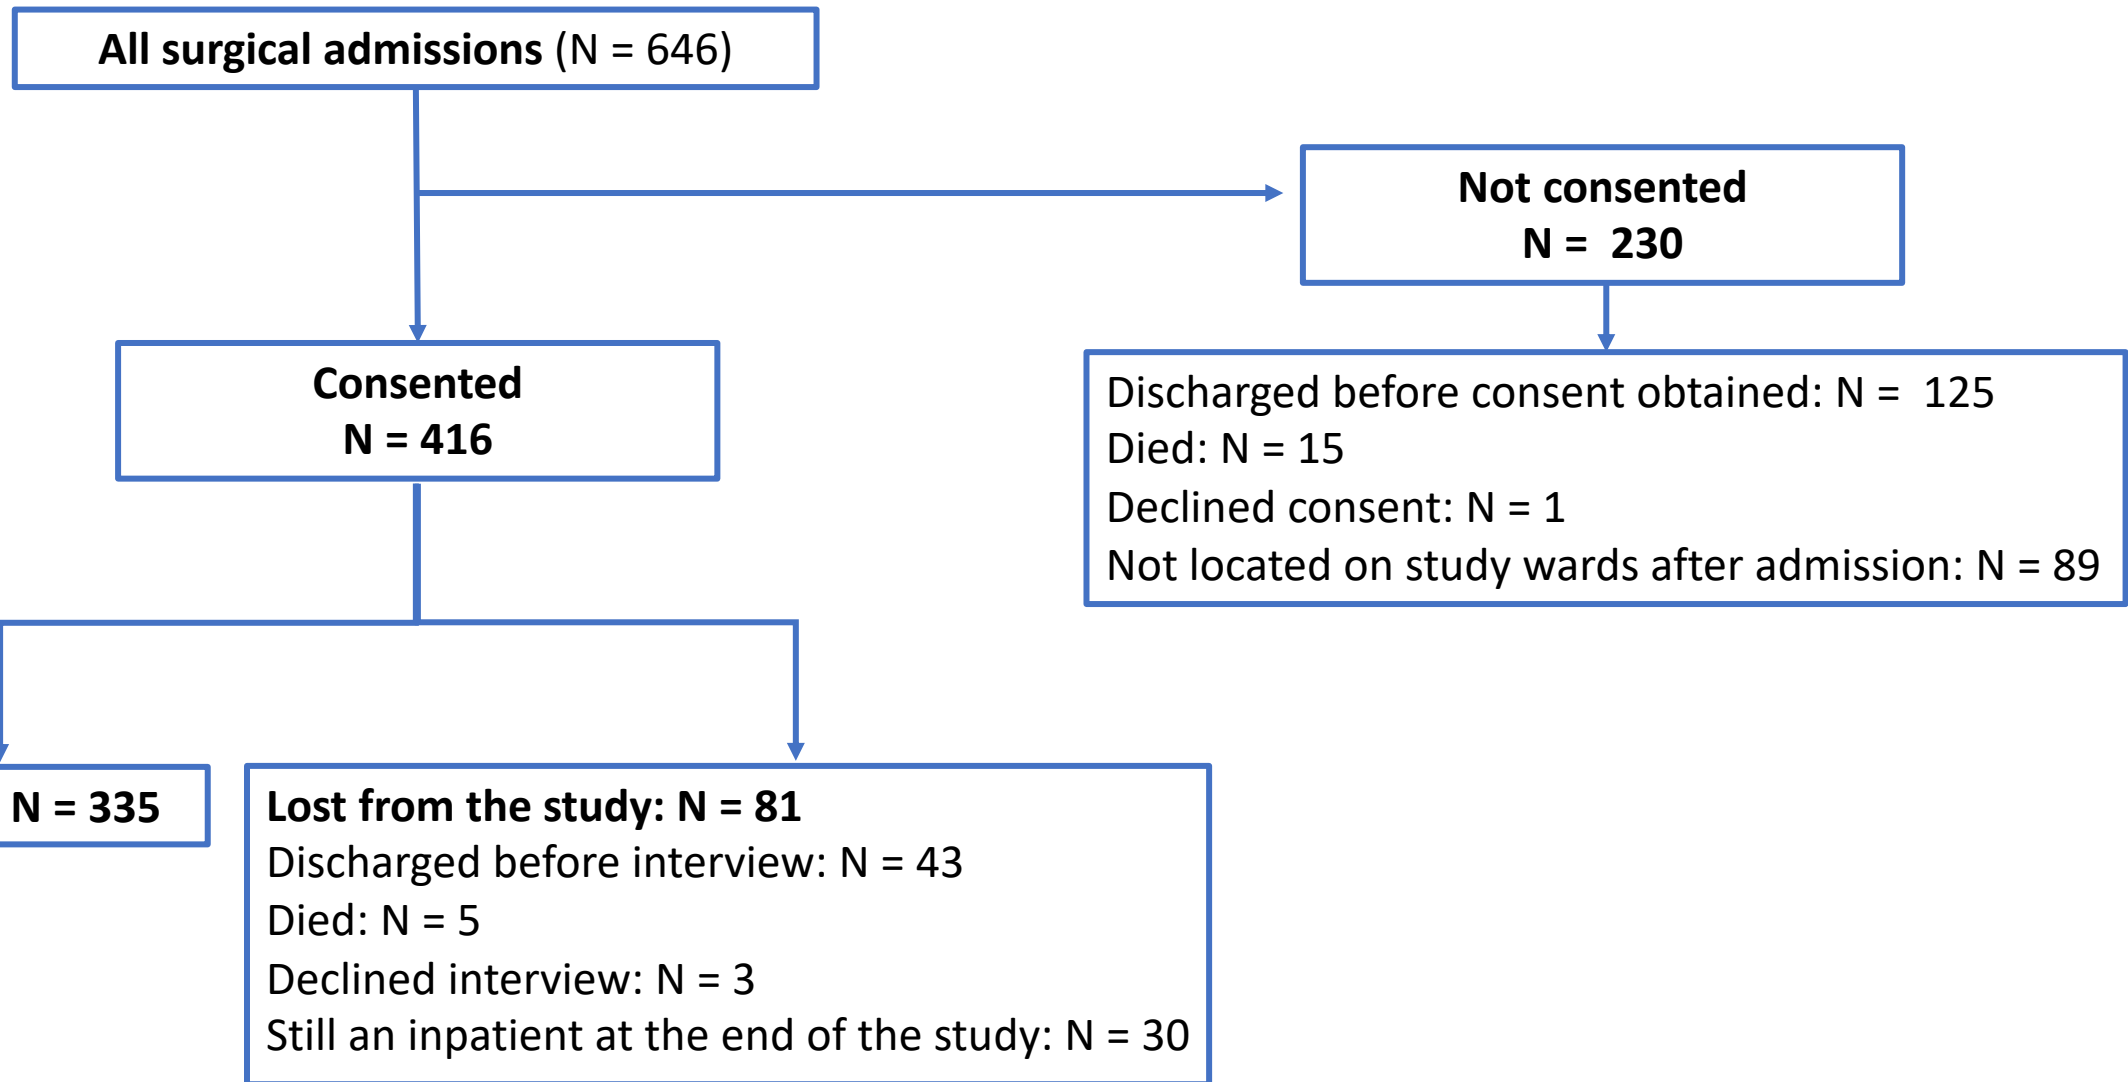

**Figure 1: Study recruitment process diagram.** Flow diagram of the total number of admissions (646) during the study period, highlighting those recruited, lost from the study and reasons for this.

## Appendix

### Additional information on recruitment and training of research assistants

RAs were recruited through a competitive process and trained to administer the questionnaire. Training for all RAs was standardised and formally ran over 2 days. This involved; a formal presentation introducing the study, a review of all study processes and associated documents, a role play interview between the RAs using the questionnaire, a walk through the hospital to ensure the RAs gained an insight in to the surgical patients' journey and points at which OOP payments may be made or cost incurred and a review of clinical notes, ward admission books and theatre log books to ensure that all demographic and diagnostic information was accurately captured.

### Appendix table 1: Household expenditure showing imputed and non-imputed data sets.

Comparison of non-imputed and imputed data on household expenditure using Multiple Imputation Chained Equations to compute missing data-points using predictive mean matching.

| Household expense                                                                                                                                       | Non-imputed data mean (SD) (Le and \$US)           | Imputed data pooled mean (Le and \$ US) |
|---------------------------------------------------------------------------------------------------------------------------------------------------------|----------------------------------------------------|-----------------------------------------|
| <b>Individual Consumption Expenditure by Households Including all variables collected</b>                                                               | <b>Le 39,665,597 (53,679,740) \$ 4,425 (5,989)</b> | <b>Le 47,944,384 \$5,349</b>            |
| <b>Individual Consumption Expenditure by Households Excluding variables with &gt; 20% missing data i.e. clothing, mobile phone credit and transport</b> | <b>Le 28,134,505 (31,539,987) \$ 3,139 (3,519)</b> | <b>Le 31,988,507 \$ 3,569</b>           |
| Food and non-alcoholic beverages                                                                                                                        | Le 18,616,404 (22,364,391) \$ 2,077 (2,495)        | Le 20,867,118 \$ 2,328                  |
| Alcoholic Beverages, Tobacco and Narcotics                                                                                                              | Le 252,991 (1,047,612) \$ 28 (117)                 | Le 314,095 \$ 35                        |
| Rental                                                                                                                                                  | Le 884,123 (4,670,009) \$ 99 (521)                 | Le 876,940 \$ 98                        |
| Household maintenance                                                                                                                                   | Le 108,092 (298,466) \$ 12 (33)                    | Le 130,857 \$ 15                        |
| Electricity, gas and other fuels                                                                                                                        | Le 720,748 (1,068,694) \$ 80 (119)                 | Le 747,701 \$ 83                        |
| Furnishings, household equipment and routine household maintenance                                                                                      | Le 632,577 (1,065,761) \$ 71 (119)                 | Le 699,188 \$ 78                        |
| Healthcare (traditional and western medicine)                                                                                                           | Le 561,770 (1,490,207) \$ 63 (166)                 | Le 740,205 \$ 83                        |
| Recreation and cultural services                                                                                                                        | Le 821,684 (1,894,677) \$ 92 (211)                 | Le 1,121,965 \$ 125                     |
| Education                                                                                                                                               | Le 1,338,183 (2,295,578) \$ 149 (256)              | Le 1,614,982 \$ 180                     |
| Personal care / toiletries                                                                                                                              | Le 609,012 (629,656) \$ 68 (70)                    | Le 627,269 \$ 70                        |
| Health insurance                                                                                                                                        | Le 8,333                                           | Le 13,370                               |

|            |                                           |                        |
|------------|-------------------------------------------|------------------------|
|            | (138,661)<br>\$ 1 (15)                    | \$ 1                   |
| Remittance | Le 974,408<br>(1,655,020)<br>\$ 109 (185) | Le 1,015,363<br>\$ 113 |
| Donations  | Le 185,233<br>(475,436)<br>\$ 21 (53)     | Le 203,246<br>\$ 23    |
| Livestock  | Le 41,400<br>(213,804)<br>\$ 5 (24)       | Le 45,254<br>\$ 5      |
| Taxes      | Le 59,500<br>(261,497)<br>\$ 7 (29)       | Le 73,723<br>\$ 8      |

**Appendix table 2: Household expenditure data.** Variables on household expenditure shown here, for broad comparison, with the Economic and Financial survey Sierra Leone 2014 data<sup>21</sup>. Categories were harmonised where possible, however given differences in questions asked between surveys, an exact match of categories was not possible to achieve. Costs from the 2014 Economic and Financial Survey were not adjusted for inflation which needs to be considered when reviewing this data.

| <b>Household consumption expenditure (in Leones (Le) and USD (\$))</b>      |                                                             |                                   |
|-----------------------------------------------------------------------------|-------------------------------------------------------------|-----------------------------------|
| <b>Household Expense</b>                                                    | <b>Sierra Leone Economic and Financial Survey data 2014</b> | <b>Study data</b>                 |
| <b>Individual Consumption Expenditure by Households (Total Expenditure)</b> | <b>Le 15,414,816<br/>\$ 1,739</b>                           | <b>Le 31,988,507<br/>\$ 3,569</b> |
| <b>Food and non-alcoholic beverages</b>                                     | <b>Le 6,838,365<br/>\$ 771</b>                              | <b>Le 20,867,118<br/>\$ 2,328</b> |
| Food                                                                        | Le 6,644,019<br>\$ 74                                       | Le 17,925,090<br>\$ 2,000         |
| Non-alcoholic beverages                                                     | Le 194,346<br>\$ 22                                         | Le 2,942,028<br>\$ 328            |
| <b>Alcoholic Beverages, Tobacco and Narcotics</b>                           | <b>Le 450,612<br/>\$ 51</b>                                 | <b>Le 314,095<br/>\$ 35</b>       |
| <b>Housing, water, electricity, gas and other fuels</b>                     | <b>Le 1,058,449<br/>\$119</b>                               | <b>Le 875,672<br/>\$ 98</b>       |
| Rental                                                                      | Le 253,948<br>\$ 29                                         | Le 876,940<br>\$ 98               |
| Maintenance and repair of the dwelling                                      | Le 32,650<br>\$ 4                                           | Le 876,940<br>\$ 98               |
| Electricity, gas and other fuels                                            | Le 595,832<br>\$ 67                                         | Le 747,701<br>\$ 83               |
| <b>Furnishings, household equipment and routine household maintenance</b>   | <b>Le 413,364<br/>\$ 47</b>                                 | <b>Le 699,188<br/>\$ 78</b>       |
| Furnishings                                                                 | Le 88,058<br>\$ 10                                          | Le 196,217<br>\$ 22               |
| Household appliances                                                        | Le 41,821<br>\$ 5                                           | Le 314,772<br>\$ 35               |
| Tools and equipment for house and garden                                    | Le 45,403<br>\$ 5                                           | Le 57,344<br>\$ 6                 |
| Goods and services for routine household maintenance                        | Le 105,438<br>\$ 12                                         | Le 130,857<br>\$ 15               |
| Purchase of vehicles                                                        | Le 108,710<br>\$ 12                                         | Le 160,759<br>\$ 18               |
| Educations                                                                  | Le 794,478<br>\$ 90                                         | Le 1,614,982<br>\$ 180            |

1  
2  
3  
4  
5  
6  
7  
8  
9  
10  
11  
12  
13  
14  
15  
16  
17  
18  
19  
20  
21  
22  
23  
24  
25  
26  
27  
28  
29  
30  
31  
32  
33  
34  
35  
36  
37  
38  
39  
40  
41  
42  
43  
44  
45  
46  
47  
48  
49  
50  
51  
52  
53  
54  
55  
56  
57  
58  
59  
60

|                |                   |                   |
|----------------|-------------------|-------------------|
| Insurance (HI) | Le 38,890<br>\$ 4 | Le 13,370<br>\$ 1 |
|----------------|-------------------|-------------------|

For peer review only

Appendix table 3: Imputed and non-imputed data for out-of-pocket costs for comparison.

| Costs                                                      | Imputed<br>Mean cost<br>(\$US (% of subtotal)) | Non-imputed<br>Mean cost (\$US) (SD) |
|------------------------------------------------------------|------------------------------------------------|--------------------------------------|
| <b>Prehospital costs</b>                                   |                                                |                                      |
| <b>Direct pre-hospital medical OOP costs (total)</b>       | <b>21 (88% of 24)</b>                          | <b>14 (65)</b>                       |
| - Consultation                                             | 2 (10% of 21)                                  | 1 (6)                                |
| - Medications                                              | 12 (57% of 21)                                 | 9 (46)                               |
| - Medical supplies                                         | 2 (10% of 21)                                  | 2 (8)                                |
| - Investigations                                           | 4 (19% of 21)                                  | 4 (25)                               |
| - Other miscellaneous                                      | 2 (10% of 21)                                  | 1 (10)                               |
| <b>Direct (pre-hospital) non-medical OOP costs (total)</b> | <b>3 (13% of 24)</b>                           | <b>3 (9)</b>                         |
| - Transport                                                | 3 (100% of 3)                                  | 3 (9)                                |
| <b>Total pre-hospital costs</b>                            | <b>24 (10% of 243)</b>                         | <b>25 (75)</b>                       |
| <b>In hospital costs</b>                                   |                                                |                                      |
| <b>Direct medical OOP costs (total)</b>                    | <b>138 (63% of 219)</b>                        | <b>109 (121)</b>                     |
| - Administrative                                           | 20 (14% of 138)                                | 16 (24)                              |
| - Medications                                              | 26 (19% of 138)                                | 25 (61)                              |
| - Medical supplies                                         | 14 (10% of 138)                                | 11 (33)                              |
| - Investigations                                           | 15 (11% of 138)                                | 14 (23)                              |
| - Blood transfusion                                        | 9 (7% of 138)                                  | 9 (22)                               |
| - Total operation costs                                    | 49 (36% of 138)                                | 51 (75)                              |
| - Unofficial costs                                         | 6 (4% of 138)                                  | 5 (9)                                |
| - Other / miscellaneous                                    | 1 (1% of 138)                                  | 1 (8)                                |
| <b>Direct non-medical costs (total)</b>                    | <b>34 (16% of 219)</b>                         | <b>34 (34)</b>                       |
| - Transport to hospital                                    | 7 (21% of 34)                                  | 7 (17)                               |
| - Food                                                     | 20 (59% of 34)                                 | 21 (20)                              |
| - Accommodation                                            | 0 (0% of 34)                                   | 0 (0)                                |
| - Other*                                                   | 7 (21% of 34)                                  | 6 (10)                               |
| <b>Indirect costs</b>                                      |                                                |                                      |
| - Lost wages                                               | 46 (100% of 46)                                | 35 (116)                             |
| <b>TOTAL OOP COSTS</b>                                     | <b>243</b>                                     | <b>176 (165)</b>                     |

\*other relates to travel and other associated costs incurred as a result for needed investigations from and or medication / supplies from an external facility. SPSS calculates only the mean using imputed variables, hence no standard deviation is displayed.



**Appendix table 4: Route of payment for OOP costs; percentage of the total OOP costs by cost categories paid to bank / cashier, directly to staff or externally for different services accessed once tertiary level care was reached**

| Costs                                                       | % paid to Hospital bank / cashier | % paid directly to or via staff | % paid externally | % unknown    | Total       |
|-------------------------------------------------------------|-----------------------------------|---------------------------------|-------------------|--------------|-------------|
| <b>TOTAL in-hospital costs</b>                              | <b>32.64%</b>                     | <b>48.16%</b>                   | <b>16.50%</b>     | <b>2.70%</b> | <b>100%</b> |
| <b>Administration</b>                                       | <b>52.03%</b>                     | <b>42.53%</b>                   | -                 | 5.44%        | 100%        |
| - Registration fees                                         | 90.98%                            | 8.71%                           | -                 | 0.30%        | 100%        |
| - Admission fees                                            | 66.78%                            | 32.39%                          | -                 | 0.83%        | 100%        |
| - Triage fees                                               | 8.05%                             | 91.95%                          | -                 | 0.00%        | 100%        |
| - Bed fees                                                  | 19.47%                            | 46.13%                          | -                 | 34.40%       | 100%        |
| - Discharge fees                                            | 41.19%                            | 57.28%                          | -                 | 1.53%        | 100%        |
| <b>Investigations</b>                                       | <b>19.39%</b>                     | <b>44.29%</b>                   | <b>33.73%</b>     | <b>2.59%</b> | <b>100%</b> |
| - Laboratory                                                | 25.68%                            | 40.29%                          | 30.13%            | 3.90%        | 100%        |
| - Imaging                                                   | 14.43%                            | 47.44%                          | 36.57%            | 1.56%        | 100%        |
| <b>Total operation costs</b>                                | <b>55.40%</b>                     | <b>32.89%</b>                   | <b>9.35%</b>      | <b>2.35%</b> | <b>100%</b> |
| - Operation                                                 | 80.10%                            | 18.91%                          | -                 | 1.00%        | 100%        |
| - Medical supplies for the operation                        | 13.42%                            | 56.59%                          | 25.31%            | 4.68%        | 100%        |
| - Other / miscellaneous                                     | 69.77%                            | 30.23%                          | -                 | 0.00%        | 100%        |
| <b>Blood transfusion</b>                                    | <b>16.24%</b>                     | <b>67.68%</b>                   | <b>13.85%</b>     | <b>2.23%</b> | <b>100%</b> |
| <b>Total medications and medical supplies for ward care</b> | <b>4.82%</b>                      | <b>61.00%</b>                   | <b>31.73%</b>     | <b>2.45%</b> | <b>100%</b> |
| - Medications                                               | 2.19%                             | 62.86%                          | 31.91%            | 3.03%        | 100%        |
| - Medical supplies                                          | 10.81%                            | 56.74%                          | 31.31%            | 1.14%        | 100%        |
| <b>Informal payment</b>                                     | <b>2.44%</b>                      | <b>97.56%</b>                   | -                 | <b>0.00%</b> | <b>100%</b> |
| - Doctors' fees                                             | 8.72%                             | 91.28%                          | -                 | 0.00%        | 100%        |
| - Nursing care                                              | 0%                                | 100%                            | -                 | 0.00%        | 100%        |
| - Porters                                                   | 0%                                | 100%                            | -                 | 0.00%        | 100%        |
| - Tips                                                      | 0%                                | 100%                            | -                 | 0.00%        | 100%        |
| <b>Other / miscellaneous costs</b>                          | <b>0%</b>                         | <b>98.37%</b>                   | <b>0</b>          | <b>1.63%</b> | <b>100%</b> |

**Appendix table 5: Linear regression analysis showing odds of increasing in-hospital costs of care for each variable using a generalized linear model with imputed variables using a Tweedie 1.9 function.**

| Variable              |                            | Odds Ratio | 95% CI       | p-value |
|-----------------------|----------------------------|------------|--------------|---------|
| Sex                   | Female                     | ref        |              |         |
|                       | Male                       | 1.05       | (0.86-1.29)  | 0.63    |
| Age                   | Age                        | 1.02       | (1.01-1.02)  | 0.00    |
| Length of stay        | Length of stay             | 1.02       | (1.02 -1.03) | 0.00    |
| Type of admission     | Elective admission         | ref        |              |         |
|                       | Emergency admission        | 0.96       | (0.75-1.24)  | 0.77    |
| Category of operation | Non-operative              | ref        |              |         |
|                       | Burns                      | 1.33       | (0.25-7.00)  | 0.74    |
|                       | ENT                        | 0.64       | (0.36-1.166) | 0.14    |
|                       | General surgery            | 1.67       | (1.29-2.17)  | 0.00    |
|                       | General paediatric surgery | 0.84       | (0.57-1.24)  | 0.38    |
|                       | Trauma and orthopaedic     | 1.30       | (0.98- 1.74) | 0.07    |
|                       | Urology                    | 2.08       | (1.22-3.53)  | 0.01    |
| Area of residence     | Rural                      | ref        |              |         |
|                       | Urban                      | 0.98       | (0.76-1.25)  | 0.85    |

Appendix table 6: Study questionnaire

**Section 1: Demographics and admission questions**

*These questions are to be answered in conjunction with the patients notes and screening/recruitment sheet*

| Code | Question                                                                                             | Response                                                                                                                                                                                                                                                                                                                                          |
|------|------------------------------------------------------------------------------------------------------|---------------------------------------------------------------------------------------------------------------------------------------------------------------------------------------------------------------------------------------------------------------------------------------------------------------------------------------------------|
| A1   | Participant <b>unique ID</b> :                                                                       |                                                                                                                                                                                                                                                                                                                                                   |
| A2   | <b>Discharge</b> details                                                                             | Care episode complete and discharged by Dr <input type="checkbox"/><br>Transfer to another healthcare facility <input type="checkbox"/><br>Self-discharging <input type="checkbox"/> If ticked state reason _____                                                                                                                                 |
| A3   | Where was the patient <b>admitted from</b> ?                                                         | Connaught<br>Direct to trauma ward / A&E / OPD <input type="checkbox"/><br>Referral <input type="checkbox"/> specify _____<br>SOP (specialist outpatients) <input type="checkbox"/><br>Through direct contact <input type="checkbox"/><br>Transfer from the medical ward <input type="checkbox"/><br>Other <input type="checkbox"/> specify _____ |
| A4   | Where is the patient being <b>discharged from</b> ?                                                  | Connaught<br>Trauma ward / A&E / OPD <input type="checkbox"/><br>Surgical ward <input type="checkbox"/><br>Annexe <input type="checkbox"/><br>Other <input type="checkbox"/> specify _____                                                                                                                                                        |
| A5   | <b>Age</b> of patient                                                                                | _____ / Don't know <input type="checkbox"/> / Adult (AD) <input type="checkbox"/>                                                                                                                                                                                                                                                                 |
| A6   | <b>Sex</b>                                                                                           | Male <input type="checkbox"/> Female <input type="checkbox"/>                                                                                                                                                                                                                                                                                     |
| A7   | Usual <b>residential location</b> (address including district and from that state if urban or rural) | Address: _____<br>Urban <input type="checkbox"/> Rural <input type="checkbox"/>                                                                                                                                                                                                                                                                   |

|     |                                                                                                                                                               |                                                                                                                                                                                                                                                                                                                                                               |
|-----|---------------------------------------------------------------------------------------------------------------------------------------------------------------|---------------------------------------------------------------------------------------------------------------------------------------------------------------------------------------------------------------------------------------------------------------------------------------------------------------------------------------------------------------|
| A8  | Does the patient meet any exemption criteria for <b>free treatment</b> ?                                                                                      | Yes <input type="checkbox"/> No <input type="checkbox"/><br>If yes, state which criteria (tick as applicable)<br>Aged under 5 years <input type="checkbox"/><br>Pregnant <input type="checkbox"/><br>Lactating <input type="checkbox"/><br>Ebola survivor <input type="checkbox"/><br>Destitute <input type="checkbox"/><br>Disabled <input type="checkbox"/> |
| A9  | <b>Type of admission</b>                                                                                                                                      | Emergency (e.g trauma ward) <input type="checkbox"/> Elective <input type="checkbox"/>                                                                                                                                                                                                                                                                        |
| A10 | <b>Primary diagnosis</b>                                                                                                                                      | _____                                                                                                                                                                                                                                                                                                                                                         |
| A11 | What <b>treatment</b> did the patient receive?<br>(Note: Procedures are often done in the Trauma ward (minors procedure room) e.g skin traction/POP/suturing) | <b>Operation/ procedure</b> <input type="checkbox"/> (specify and go to A14)<br>Specify _____<br><b>Non-operative</b> surgical care <input type="checkbox"/> (go to A13)                                                                                                                                                                                      |
| A12 | If patient received <b>non-operative care</b> state reason                                                                                                    | Clinically appropriate / not recommended by Dr <input type="checkbox"/><br>Patient chose not to have an operation / procedure <input type="checkbox"/><br>Financial (unable to pay) <input type="checkbox"/><br>Other <input type="checkbox"/> (please give a brief statement)<br>_____                                                                       |
| A13 | <b>Length of hospital stay</b> (admission and discharge date)                                                                                                 | <b>Admission date:</b> __/__/____ <b>Discharge date:</b> __/__/____                                                                                                                                                                                                                                                                                           |

### Section 2a: Household structure and typical household income and expenditure

All questions are to be answered by the patient, parent, guardian or household member or head. **Encourage patient to invite household head / member / breadwinner or the person who deals with household expenditure and or has made the payments for the care received - to help answer the questions.**

**“Firstly are a few questions to understand the structure of your household (the people that eat food from the same pot and take instructions from the same head (excluding lodgers / individuals that pay to live in your house) and the average household income”**

| Code | Question                                                                                                                                                                                                                   | Response                                                                                                                                                                                                                                                                                                                                                                                                                                          |
|------|----------------------------------------------------------------------------------------------------------------------------------------------------------------------------------------------------------------------------|---------------------------------------------------------------------------------------------------------------------------------------------------------------------------------------------------------------------------------------------------------------------------------------------------------------------------------------------------------------------------------------------------------------------------------------------------|
| B1   | <b>Who</b> is being interviewed? Tick <u>all</u> that are applicable<br><br>If questions are being answered by someone other than the patient (e.g. household member), what is their relationship to the patient?          | Patient <input type="checkbox"/><br>Parent / Guardian <input type="checkbox"/><br>Household head <input type="checkbox"/><br>Other <input type="checkbox"/> (State relationship to patient)<br>_____                                                                                                                                                                                                                                              |
| B2   | What is the <b>size of your household</b> , including yourself how many people normally eat food from the same pot and take instructions from the same head (exclude lodgers / individuals that pay to live in your house) | _____                                                                                                                                                                                                                                                                                                                                                                                                                                             |
| B3   | Does <b>anyone in your household (household head/members) generate income</b> ?                                                                                                                                            | Yes <input type="checkbox"/> (go to B4) No <input type="checkbox"/> (go to B7)                                                                                                                                                                                                                                                                                                                                                                    |
| B4   | <b>How many people</b> in your household <b>generate income</b> that is used to support the household?                                                                                                                     | _____ Don't know <input type="checkbox"/>                                                                                                                                                                                                                                                                                                                                                                                                         |
| B5   | What is the <b>occupation</b> of the person <b>who contributes the most</b> to your household expenses?                                                                                                                    | _____ Salaried <input type="checkbox"/> Non-salaried <input type="checkbox"/><br>Don't know <input type="checkbox"/>                                                                                                                                                                                                                                                                                                                              |
| B6   | <b>How much income does your household generate</b> (in total) to support the household in a typical month?                                                                                                                | _____ Leones Don't know <input type="checkbox"/>                                                                                                                                                                                                                                                                                                                                                                                                  |
| B7   | What is the <b>highest level of education of the main breadwinner (i.e the individual identified in B5)</b> ?                                                                                                              | No formal education <input type="checkbox"/><br>Primary <input type="checkbox"/><br>Secondary <input type="checkbox"/><br>College <input type="checkbox"/><br>University <input type="checkbox"/><br>Other <input type="checkbox"/> specify _____                                                                                                                                                                                                 |
| B8   | Does your household <b>have any of the following</b> ?                                                                                                                                                                     | Electricity / Light Yes <input type="checkbox"/> No <input type="checkbox"/><br>Mobile phone Yes <input type="checkbox"/> No <input type="checkbox"/><br>Radio Yes <input type="checkbox"/> No <input type="checkbox"/><br>Television (TV) Yes <input type="checkbox"/> No <input type="checkbox"/><br>Computer Yes <input type="checkbox"/> No <input type="checkbox"/><br>Refrigerator Yes <input type="checkbox"/> No <input type="checkbox"/> |

|     |                                                            |                                                                                                                                                                                                                                                                                               |
|-----|------------------------------------------------------------|-----------------------------------------------------------------------------------------------------------------------------------------------------------------------------------------------------------------------------------------------------------------------------------------------|
|     |                                                            | Generator Yes <input type="checkbox"/> No <input type="checkbox"/><br>Bicycle Yes <input type="checkbox"/> No <input type="checkbox"/><br>Honda/ Motorcycle Yes <input type="checkbox"/> No <input type="checkbox"/><br>Car or truck Yes <input type="checkbox"/> No <input type="checkbox"/> |
| B9  | What material is used for the <b>roof of your house</b> ?  | Natural roofing (thatch) <input type="checkbox"/><br>Basic roofing (tarpoline, metal, zinc) <input type="checkbox"/><br>Finished roof (concrete / tiled) <input type="checkbox"/><br>Other <input type="checkbox"/> specify _____                                                             |
| B10 | What material is used for the <b>floor of your house</b> ? | Natural floor (mud/earth/wattle) <input type="checkbox"/><br>Basic floor (wood/cement) <input type="checkbox"/><br>Finished floor (concrete/tile/carpet) <input type="checkbox"/><br>Other <input type="checkbox"/> specify _____                                                             |
| B11 | What material is used for the <b>walls of your house</b> ? | Natural walls (mud/earth/wattle) <input type="checkbox"/><br>Basic walls (stone/mud bricks/zinc) <input type="checkbox"/><br>Finished walls (concrete) <input type="checkbox"/><br>Other <input type="checkbox"/> specify _____                                                               |

**Section 2b: Typical household expenditure**

**“I would now like to ask you some questions about your household expenses starting with how much your household spends on food and consumption in a typical week”**

| Code | Question                                                                                                                  | Response                                                                                                                                                                           |
|------|---------------------------------------------------------------------------------------------------------------------------|------------------------------------------------------------------------------------------------------------------------------------------------------------------------------------|
| C1   | Does the month of <b>Ramadhan</b> effect your household spending/expenses?                                                | Yes <input type="checkbox"/> No <input type="checkbox"/><br><b>If yes, say: please answer all the questions on expenses based on a week / month outside of the Ramadhan period</b> |
| C2   | How much does your household spend on <b>food (including chop money)</b> ?                                                | _____ Leones Don't know <input type="checkbox"/>                                                                                                                                   |
| C3   | How much does your household spend <b>drinks</b> (non-alcoholic drinks such as water, tea, coffee, milk and soft drinks)? | _____ Leones Don't know <input type="checkbox"/>                                                                                                                                   |
| C4   | <b>Tobacco and alcoholic beverages</b> (including beer, wine, spirits, poyo) – had at home / outside                      | _____ Leones Don't know <input type="checkbox"/>                                                                                                                                   |
| C5   | Food eaten outside the dwelling (for example, at vendors, <b>cooking</b> , kiosks or restaurants)                         | _____ Leones Don't know <input type="checkbox"/>                                                                                                                                   |
| C6   | <b>Other food</b> items (e.g kola nut, food not included in chop money)                                                   | _____ Leones Don't know <input type="checkbox"/>                                                                                                                                   |
| C7   | Communication fees, including megabites (internet), mobile phone ( <b>credit /top up</b> ) and others?                    | _____ Leones Don't know <input type="checkbox"/>                                                                                                                                   |
| C8   | <b>Transportation</b> (to work place, market, school etc)? (For example, petrol, taxis, motorbike taxis)                  | _____ Leones Don't know <input type="checkbox"/>                                                                                                                                   |

**“I would now like to ask you about other expenses your household might have had in the last month or a typical month”**

|     |                                                                                                                                                                                                                 |                                                                                       |
|-----|-----------------------------------------------------------------------------------------------------------------------------------------------------------------------------------------------------------------|---------------------------------------------------------------------------------------|
| C9  | <b>Utilities, such as water, light, electricity (NPA), waste disposal, etc.?</b>                                                                                                                                | _____ Leones Don't know <input type="checkbox"/>                                      |
| C10 | <b>Fuel (e.g cooking / generator - gas, coal, kerosene, firewood, petrol, diesel, etc.)?</b>                                                                                                                    | _____ Leones Don't know <input type="checkbox"/>                                      |
| C11 | <b>Personal toiletries</b> and personal care (e.g.soap, toothpaste, toothbrush, toilet roll, cosmetics, beauty salon, getting hair done etc.)?                                                                  | _____ Leones Don't know <input type="checkbox"/>                                      |
| C12 | <b>Clothing</b> and bedding?                                                                                                                                                                                    | _____ Leones Don't know <input type="checkbox"/>                                      |
| C13 | <b>Loan repayments</b> (e.g on your house) / other <b>debt</b> or <b>microcredit</b> for business or other purposes?                                                                                            | _____ Leones Don't know <input type="checkbox"/>                                      |
| C14 | <b>Entertainment</b> , including; cinemas/video centres to watch football matches, games, stadium for shows, soccer matches, or hangouts / chilling?                                                            | _____ Leones Don't know <input type="checkbox"/>                                      |
| C15 | Payments for <b>household help</b> /servants, including cook, maid, driver, security, gardener, etc.?                                                                                                           | _____ Leones Don't know <input type="checkbox"/>                                      |
| C16 | How much does your household pay in <b>remittance</b> to family living away from home ( <b>money, airtel/Africell money, food</b> etc)?                                                                         | _____ Leones Don't know <input type="checkbox"/>                                      |
| C17 | Excluding this hospital stay, how much money does your household usually spend on health care related to <b>“white man medicine”</b> , including medicines, fees for doctors’ appointments and hospital visits? | _____ Leones Don't know <input type="checkbox"/>                                      |
| C18 | Excluding this hospital stay, how much money does your household usually spend on health care related to <b>“country/black man medicine”</b> ?                                                                  | _____ Leones Don't know <input type="checkbox"/>                                      |
| C19 | Do you have any <b>other monthly expenditures</b> ?                                                                                                                                                             | Yes <input type="checkbox"/> Specify _____<br>No <input type="checkbox"/> (go to C21) |

|                                                                                                                                                                                                                                                           |                                                                                                                                                                                                                                                                   |              |                                     |
|-----------------------------------------------------------------------------------------------------------------------------------------------------------------------------------------------------------------------------------------------------------|-------------------------------------------------------------------------------------------------------------------------------------------------------------------------------------------------------------------------------------------------------------------|--------------|-------------------------------------|
| C20                                                                                                                                                                                                                                                       | <b>How much do these other expenditures</b> amount to?                                                                                                                                                                                                            | _____ Leones | Don't know <input type="checkbox"/> |
| "I know these questions may be difficult to answer but try to give me the best estimate of expenses. I would now like you to focus on household expenses <b>over the last 12 months</b> . These are expenses that may be more periodic or "big purchases" |                                                                                                                                                                                                                                                                   |              |                                     |
| C21                                                                                                                                                                                                                                                       | <b>Rent</b> (per year)                                                                                                                                                                                                                                            | _____ Leones | Don't know <input type="checkbox"/> |
| C22                                                                                                                                                                                                                                                       | <b>Education fees and school supplies</b> (tuition, course fees, books)?                                                                                                                                                                                          | _____ Leones | Don't know <input type="checkbox"/> |
| C23                                                                                                                                                                                                                                                       | <b>Electrical goods</b> (mobile phones, televisions, DVD, radio, refrigerators,)?                                                                                                                                                                                 | _____ Leones | Don't know <input type="checkbox"/> |
| C24                                                                                                                                                                                                                                                       | <b>Big purchases</b> such as;<br><b>Furniture</b> (tables, chairs, beds, sleeping mats)<br><b>Vehicles</b> (trucks, cars, motorcycles, keke, bicycles) and <b>upkeep/repairs?</b><br><b>Tools</b> (brooms, nails, hammer, paint, shovel, gardening equipment etc) | _____ Leones | Don't know <input type="checkbox"/> |
| C25                                                                                                                                                                                                                                                       | <b>Hosting rituals or ceremonies</b> (funerals, birthdays, wedding, naming ceremony, pray de close, Christmas, the Haj)?                                                                                                                                          | _____ Leones | Don't know <input type="checkbox"/> |
| C26                                                                                                                                                                                                                                                       | <b>Gifts for ceremonies</b> (funerals, birthdays, wedding, naming ceremony, pray de close, Christmas) if invited?                                                                                                                                                 | _____ Leones | Don't know <input type="checkbox"/> |
| C27                                                                                                                                                                                                                                                       | <b>Donations or contributions</b> to religious organisations (e.g. church/mosque)                                                                                                                                                                                 | _____ Leones | Don't know <input type="checkbox"/> |
| C28                                                                                                                                                                                                                                                       | <b>Deposit / upfront payments for property or land</b> (excluding monthly loans)?                                                                                                                                                                                 | _____ Leones | Don't know <input type="checkbox"/> |
| C29                                                                                                                                                                                                                                                       | Cleaning services or repair service ( <b>house maintenance</b> )?                                                                                                                                                                                                 | _____ Leones | Don't know <input type="checkbox"/> |
| C30                                                                                                                                                                                                                                                       | <b>Livestock</b> (chicken, goat, sheep etc)?                                                                                                                                                                                                                      | _____ Leones | Don't know <input type="checkbox"/> |
| C31                                                                                                                                                                                                                                                       | <b>Taxes</b> (city rate for home owner, vehicle tax, city council tax, NASSIT (national social security insurance trust)?                                                                                                                                         | _____ Leones | Don't know <input type="checkbox"/> |
| C32                                                                                                                                                                                                                                                       | <b>Health insurance</b> premiums (including, community health insurance schemes) or pre-paid health plans?                                                                                                                                                        | _____ Leones | Don't know <input type="checkbox"/> |

**Section 3: Out-of-pocket payments for care sought prior to admission (from the day they fell ill with this illness)**

"I would now like to ask you about all the health costs to your household **before coming to hospital from when you fell sick with this illness / problem**"

| Code                                                                                                                                                                                                                                                                                                                      | Question                                                                                                                                                                                                                                                                                                                                                                                                                                                                                                                                                                                                                                                                                                                                                                                             | Response                                                                                                                                                                                                                                                                                                                                                                                                                                                                                                                                                                                                                                                                                        |
|---------------------------------------------------------------------------------------------------------------------------------------------------------------------------------------------------------------------------------------------------------------------------------------------------------------------------|------------------------------------------------------------------------------------------------------------------------------------------------------------------------------------------------------------------------------------------------------------------------------------------------------------------------------------------------------------------------------------------------------------------------------------------------------------------------------------------------------------------------------------------------------------------------------------------------------------------------------------------------------------------------------------------------------------------------------------------------------------------------------------------------------|-------------------------------------------------------------------------------------------------------------------------------------------------------------------------------------------------------------------------------------------------------------------------------------------------------------------------------------------------------------------------------------------------------------------------------------------------------------------------------------------------------------------------------------------------------------------------------------------------------------------------------------------------------------------------------------------------|
| D1                                                                                                                                                                                                                                                                                                                        | <b>When did you fall sick with the illness</b> that meant you had to be admitted to hospital?                                                                                                                                                                                                                                                                                                                                                                                                                                                                                                                                                                                                                                                                                                        | _____ days before admission<br>_____ weeks before admission<br>_____ months before admission<br>Don't know <input type="checkbox"/> (go to section 3 (C1))                                                                                                                                                                                                                                                                                                                                                                                                                                                                                                                                      |
| "I would now like you to think about that period of time; <b>from falling sick to getting to the point of decision to come to Connaught / PCMH</b> . The following questions will be related to that time. I know that it may be difficult to think that far back but please give the best estimate you can of the costs" |                                                                                                                                                                                                                                                                                                                                                                                                                                                                                                                                                                                                                                                                                                                                                                                                      |                                                                                                                                                                                                                                                                                                                                                                                                                                                                                                                                                                                                                                                                                                 |
| D2                                                                                                                                                                                                                                                                                                                        | Did you seek care for this illness elsewhere <b>before coming to this hospital?</b>                                                                                                                                                                                                                                                                                                                                                                                                                                                                                                                                                                                                                                                                                                                  | Yes <input type="checkbox"/> (go to D3) No <input type="checkbox"/> (go to section 4 (E1))                                                                                                                                                                                                                                                                                                                                                                                                                                                                                                                                                                                                      |
| D3                                                                                                                                                                                                                                                                                                                        | <b>Where did you go</b> to get care for your illness before coming to this hospital? Tick <u>all</u> that are applicable<br><br>For each type of care provider ticked from the list below ask about the <b>number of visits</b> and a <b>cost break down</b> . If the patient cannot give a breakdown of costs ask for an <b>estimated total</b><br><b>Guidance notes;</b><br><b>Consultation</b> - fees to the provider ("doctors' fees"), fees excluding investigations and tests<br><b>Medications</b><br><b>Medical supplies</b> - Consumables, gloves, bandages, dressings etc<br><b>Investigations</b> - Includes labs, scans, x-rays and other imaging<br><b>Transportation</b> - transport for getting to and from the facilities, subsequent investigations/ getting treatments / medicines |                                                                                                                                                                                                                                                                                                                                                                                                                                                                                                                                                                                                                                                                                                 |
|                                                                                                                                                                                                                                                                                                                           | <b>Private clinic</b> <input type="checkbox"/> no. of visits ____<br>How much was spent on;<br>Consultation _____ Leones Don't know <input type="checkbox"/><br>Medications _____ Leones Don't know <input type="checkbox"/><br>Medical supplies _____ Leones Don't know <input type="checkbox"/><br>Investigations _____ Leones Don't know <input type="checkbox"/><br>Transportation _____ Leones Don't know <input type="checkbox"/><br>Other _____ Leones Don't know <input type="checkbox"/><br><b>OR</b> Estimated total _____ Leones Don't know <input type="checkbox"/><br><br><b>Charity or religious clinic</b> <input type="checkbox"/> no. of visits ____<br>How much was spent on;                                                                                                      | <b>Other government hospital</b> <input type="checkbox"/> no. of visits ____<br>How much was spent on;<br>Consultation _____ Leones Don't know <input type="checkbox"/><br>Medications _____ Leones Don't know <input type="checkbox"/><br>Medical supplies _____ Leones Don't know <input type="checkbox"/><br>Investigations _____ Leones Don't know <input type="checkbox"/><br>Transportation _____ Leones Don't know <input type="checkbox"/><br>Other _____ Leones Don't know <input type="checkbox"/><br><b>OR</b> Estimated total _____ Leones Don't know <input type="checkbox"/><br><br><b>Private hospital</b> <input type="checkbox"/> no. of visits ____<br>How much was spent on; |

|                                                                                                                                                                                                                                                                                                                                                                                                                                                                                                                                                                                                                                                                                                                                                                                                                                                                                                                                                                                                                                                                                                                                                                                                                                                                                                                                                                                                                                                                                                                                                                                                                                                                                                                                                                                                                                                                                                                                                                                                                                                                                                                                                                                                                                                                                                                                                                                                                                                                                                                                                                                                                                                                                                                                                                                                                                                                                                                                       |                                                                                                                                                                                                                                                                                                                                                                                                                                                                                                                                                                                                                                                                                                                                                                                                                                                                                                                                                                                                                                                                                                                                                                                                                                                                                                                                                                                                                                                                                                                                                                                                                                                                                                                                                                                                                                                                                                                                                                                                                                                                                                                                                                                                                                                                                                                                                                                                                                                                                                                                                                                                                                                                                                                                                                                                                                                                                                        |
|---------------------------------------------------------------------------------------------------------------------------------------------------------------------------------------------------------------------------------------------------------------------------------------------------------------------------------------------------------------------------------------------------------------------------------------------------------------------------------------------------------------------------------------------------------------------------------------------------------------------------------------------------------------------------------------------------------------------------------------------------------------------------------------------------------------------------------------------------------------------------------------------------------------------------------------------------------------------------------------------------------------------------------------------------------------------------------------------------------------------------------------------------------------------------------------------------------------------------------------------------------------------------------------------------------------------------------------------------------------------------------------------------------------------------------------------------------------------------------------------------------------------------------------------------------------------------------------------------------------------------------------------------------------------------------------------------------------------------------------------------------------------------------------------------------------------------------------------------------------------------------------------------------------------------------------------------------------------------------------------------------------------------------------------------------------------------------------------------------------------------------------------------------------------------------------------------------------------------------------------------------------------------------------------------------------------------------------------------------------------------------------------------------------------------------------------------------------------------------------------------------------------------------------------------------------------------------------------------------------------------------------------------------------------------------------------------------------------------------------------------------------------------------------------------------------------------------------------------------------------------------------------------------------------------------------|--------------------------------------------------------------------------------------------------------------------------------------------------------------------------------------------------------------------------------------------------------------------------------------------------------------------------------------------------------------------------------------------------------------------------------------------------------------------------------------------------------------------------------------------------------------------------------------------------------------------------------------------------------------------------------------------------------------------------------------------------------------------------------------------------------------------------------------------------------------------------------------------------------------------------------------------------------------------------------------------------------------------------------------------------------------------------------------------------------------------------------------------------------------------------------------------------------------------------------------------------------------------------------------------------------------------------------------------------------------------------------------------------------------------------------------------------------------------------------------------------------------------------------------------------------------------------------------------------------------------------------------------------------------------------------------------------------------------------------------------------------------------------------------------------------------------------------------------------------------------------------------------------------------------------------------------------------------------------------------------------------------------------------------------------------------------------------------------------------------------------------------------------------------------------------------------------------------------------------------------------------------------------------------------------------------------------------------------------------------------------------------------------------------------------------------------------------------------------------------------------------------------------------------------------------------------------------------------------------------------------------------------------------------------------------------------------------------------------------------------------------------------------------------------------------------------------------------------------------------------------------------------------------|
| Consultation _____ Leones Don't know <input type="checkbox"/><br>Medications _____ Leones Don't know <input type="checkbox"/><br>Medical supplies _____ Leones Don't know <input type="checkbox"/><br>Investigations _____ Leones Don't know <input type="checkbox"/><br>Transportation _____ Leones Don't know <input type="checkbox"/><br>Other _____ Leones Don't know <input type="checkbox"/><br><b>OR</b> Estimated total _____ Leones Don't know <input type="checkbox"/><br><br><b>Pharmacy, drug peddler, pepper Dr.</b> <input type="checkbox"/> no. of visits ____<br>How much was spent on;<br>Consultation _____ Leones Don't know <input type="checkbox"/><br>Medications _____ Leones Don't know <input type="checkbox"/><br>Medical supplies _____ Leones Don't know <input type="checkbox"/><br>Investigations _____ Leones Don't know <input type="checkbox"/><br>Transportation _____ Leones Don't know <input type="checkbox"/><br>Other _____ Leones Don't know <input type="checkbox"/><br><b>OR</b> Estimated total _____ Leones Don't know <input type="checkbox"/><br><br><b>Traditional Healer / Herbalist</b> <input type="checkbox"/> no. of visits ____<br>How much was spent on;<br>Consultation _____ Leones Don't know <input type="checkbox"/><br>Medications _____ Leones Don't know <input type="checkbox"/><br>Medical supplies _____ Leones Don't know <input type="checkbox"/><br>Investigations _____ Leones Don't know <input type="checkbox"/><br>Transportation _____ Leones Don't know <input type="checkbox"/><br>Other _____ Leones Don't know <input type="checkbox"/><br><b>OR</b> Estimated total _____ Leones Don't know <input type="checkbox"/><br><br><b>Traditional Birth Attendant (TBA) /Community Health Worker came home</b> <input type="checkbox"/> no. of visits ____<br>How much was spent on;<br>Consultation _____ Leones Don't know <input type="checkbox"/><br>Medications _____ Leones Don't know <input type="checkbox"/><br>Medical supplies _____ Leones Don't know <input type="checkbox"/><br>Investigations _____ Leones Don't know <input type="checkbox"/><br>Transportation _____ Leones Don't know <input type="checkbox"/><br>Other _____ Leones Don't know <input type="checkbox"/><br><b>OR</b> Estimated total _____ Leones Don't know <input type="checkbox"/><br><br><b>Home delivery</b> <input type="checkbox"/> no. of visits ____<br>How much was spent on;<br>Consultation _____ Leones Don't know <input type="checkbox"/><br>Medications _____ Leones Don't know <input type="checkbox"/><br>Medical supplies _____ Leones Don't know <input type="checkbox"/><br>Investigations _____ Leones Don't know <input type="checkbox"/><br>Transportation _____ Leones Don't know <input type="checkbox"/><br>Other _____ Leones Don't know <input type="checkbox"/><br><b>OR</b> Estimated total _____ Leones Don't know <input type="checkbox"/> | Consultation _____ Leones Don't know <input type="checkbox"/><br>Medications _____ Leones Don't know <input type="checkbox"/><br>Medical supplies _____ Leones Don't know <input type="checkbox"/><br>Investigations _____ Leones Don't know <input type="checkbox"/><br>Transportation _____ Leones Don't know <input type="checkbox"/><br>Other _____ Leones Don't know <input type="checkbox"/><br><b>OR</b> Estimated total _____ Leones Don't know <input type="checkbox"/><br><br><b>Community health clinic (Cheifdom level)</b> <input type="checkbox"/> no. of visits ____<br>How much was spent on;<br>Consultation _____ Leones Don't know <input type="checkbox"/><br>Medications _____ Leones Don't know <input type="checkbox"/><br>Medical supplies _____ Leones Don't know <input type="checkbox"/><br>Investigations _____ Leones Don't know <input type="checkbox"/><br>Transportation _____ Leones Don't know <input type="checkbox"/><br>Other _____ Leones Don't know <input type="checkbox"/><br><b>OR</b> Estimated total _____ Leones Don't know <input type="checkbox"/><br><br><b>Community health post</b> <input type="checkbox"/> no. of visits ____<br>How much was spent on;<br>Consultation _____ Leones Don't know <input type="checkbox"/><br>Medications _____ Leones Don't know <input type="checkbox"/><br>Medical supplies _____ Leones Don't know <input type="checkbox"/><br>Investigations _____ Leones Don't know <input type="checkbox"/><br>Transportation _____ Leones Don't know <input type="checkbox"/><br>Other _____ Leones Don't know <input type="checkbox"/><br><b>OR</b> Estimated total _____ Leones Don't know <input type="checkbox"/><br><br><b>Maternity Child Health Post (MCHP)</b> <input type="checkbox"/> no. of visits ____<br>How much was spent on;<br>Consultation _____ Leones Don't know <input type="checkbox"/><br>Medications _____ Leones Don't know <input type="checkbox"/><br>Medical supplies _____ Leones Don't know <input type="checkbox"/><br>Investigations _____ Leones Don't know <input type="checkbox"/><br>Transportation _____ Leones Don't know <input type="checkbox"/><br>Other _____ Leones Don't know <input type="checkbox"/><br><b>OR</b> Estimated total _____ Leones Don't know <input type="checkbox"/><br><br><b>Other</b> <input type="checkbox"/> specify _____ no. of visits ____<br>How much was spent on;<br>Consultation _____ Leones Don't know <input type="checkbox"/><br>Medications _____ Leones Don't know <input type="checkbox"/><br>Medical supplies _____ Leones Don't know <input type="checkbox"/><br>Investigations _____ Leones Don't know <input type="checkbox"/><br>Transportation _____ Leones Don't know <input type="checkbox"/><br>Other _____ Leones Don't know <input type="checkbox"/><br><b>OR</b> Estimated total _____ Leones Don't know <input type="checkbox"/> |
|---------------------------------------------------------------------------------------------------------------------------------------------------------------------------------------------------------------------------------------------------------------------------------------------------------------------------------------------------------------------------------------------------------------------------------------------------------------------------------------------------------------------------------------------------------------------------------------------------------------------------------------------------------------------------------------------------------------------------------------------------------------------------------------------------------------------------------------------------------------------------------------------------------------------------------------------------------------------------------------------------------------------------------------------------------------------------------------------------------------------------------------------------------------------------------------------------------------------------------------------------------------------------------------------------------------------------------------------------------------------------------------------------------------------------------------------------------------------------------------------------------------------------------------------------------------------------------------------------------------------------------------------------------------------------------------------------------------------------------------------------------------------------------------------------------------------------------------------------------------------------------------------------------------------------------------------------------------------------------------------------------------------------------------------------------------------------------------------------------------------------------------------------------------------------------------------------------------------------------------------------------------------------------------------------------------------------------------------------------------------------------------------------------------------------------------------------------------------------------------------------------------------------------------------------------------------------------------------------------------------------------------------------------------------------------------------------------------------------------------------------------------------------------------------------------------------------------------------------------------------------------------------------------------------------------------|--------------------------------------------------------------------------------------------------------------------------------------------------------------------------------------------------------------------------------------------------------------------------------------------------------------------------------------------------------------------------------------------------------------------------------------------------------------------------------------------------------------------------------------------------------------------------------------------------------------------------------------------------------------------------------------------------------------------------------------------------------------------------------------------------------------------------------------------------------------------------------------------------------------------------------------------------------------------------------------------------------------------------------------------------------------------------------------------------------------------------------------------------------------------------------------------------------------------------------------------------------------------------------------------------------------------------------------------------------------------------------------------------------------------------------------------------------------------------------------------------------------------------------------------------------------------------------------------------------------------------------------------------------------------------------------------------------------------------------------------------------------------------------------------------------------------------------------------------------------------------------------------------------------------------------------------------------------------------------------------------------------------------------------------------------------------------------------------------------------------------------------------------------------------------------------------------------------------------------------------------------------------------------------------------------------------------------------------------------------------------------------------------------------------------------------------------------------------------------------------------------------------------------------------------------------------------------------------------------------------------------------------------------------------------------------------------------------------------------------------------------------------------------------------------------------------------------------------------------------------------------------------------------|

**Section 4: Out-of-pocket payments related to hospital admission**

**"I would now like to ask you about all the costs to your household from travel to the hospital to admission, your whole hospital stay and treatment through to discharge"**

Please reiterate that as with all questions any questions related to informal payments / payments directly to staff are completely anonymous and no names are recorded or required. The purpose is to understand how much patients have to pay for all types of costs associated with their hospital admission so the following questions should be answered without undue concern.

*If the household did not incur any of the expenses listed please state 0 Leones (this applies throughout the questionnaire)*

| Code | Question | Response |
|------|----------|----------|
|------|----------|----------|

|                                                                                                                                                                                                                                                                                                                                                             |                                                                                                                                                                                                             |                                                                                                                                                                                                                                                                                                                                                                                                                                                                                                                                                   |
|-------------------------------------------------------------------------------------------------------------------------------------------------------------------------------------------------------------------------------------------------------------------------------------------------------------------------------------------------------------|-------------------------------------------------------------------------------------------------------------------------------------------------------------------------------------------------------------|---------------------------------------------------------------------------------------------------------------------------------------------------------------------------------------------------------------------------------------------------------------------------------------------------------------------------------------------------------------------------------------------------------------------------------------------------------------------------------------------------------------------------------------------------|
| 1<br>2<br>3<br>4<br>5<br>6<br>7<br>8<br>9<br>10<br>11<br>12<br>13<br>14<br>15<br>16<br>17<br>18<br>19<br>20<br>21<br>22<br>23<br>24<br>25<br>26<br>27<br>28<br>29<br>30<br>31<br>32<br>33<br>34<br>35<br>36<br>37<br>38<br>39<br>40<br>41<br>42<br>43<br>44<br>45<br>46<br>47<br>48<br>49<br>50<br>51<br>52<br>53<br>54<br>55<br>56<br>57<br>58<br>59<br>60 | <p>E1</p> <p>Once the referral or decision was made to come to Connaught/PCMH, <b>how did you and all the attendants come / travel?</b></p>                                                                 | <p>Ambulance <input type="checkbox"/></p> <p>Public transport - Taxi / KK /Okada <input type="checkbox"/></p> <p>Private transport <input type="checkbox"/></p> <p>Other <input type="checkbox"/> specify _____</p>                                                                                                                                                                                                                                                                                                                               |
|                                                                                                                                                                                                                                                                                                                                                             | <p>E2</p> <p>How much did this <b>transport cost?</b></p>                                                                                                                                                   | <p>_____ Leones Don't know <input type="checkbox"/></p>                                                                                                                                                                                                                                                                                                                                                                                                                                                                                           |
|                                                                                                                                                                                                                                                                                                                                                             | <p>E3</p> <p>Did you have to pay any money for <b>registration?</b> If yes, ask how much the household paid for registration fees?</p> <p>Tick <u>all</u> that are applicable</p>                           | <p>_____ Leones Don't know <input type="checkbox"/></p> <p>Who or where was that paid to;</p> <ul style="list-style-type: none"> <li>- Bank in Connaught <input type="checkbox"/></li> <li>- _____ Leones</li> <li>- Directly to hospital staff <input type="checkbox"/></li> <li>- _____ Leones</li> <li>- Other <input type="checkbox"/> specify _____</li> <li>- _____ Leones</li> </ul>                                                                                                                                                       |
|                                                                                                                                                                                                                                                                                                                                                             | <p>E4</p> <p>Did you have to pay any money for <b>admission</b> (fees / booklet)? If yes, ask how much the household paid for admission?</p> <p>Tick <u>all</u> that are applicable</p>                     | <p>_____ Leones Don't know <input type="checkbox"/></p> <p>Who or where was that paid to;</p> <ul style="list-style-type: none"> <li>- Bank in Connaught <input type="checkbox"/></li> <li>- _____ Leones</li> <li>- Directly to hospital staff <input type="checkbox"/></li> <li>- _____ Leones</li> <li>- Other <input type="checkbox"/> specify _____</li> <li>- _____ Leones</li> </ul>                                                                                                                                                       |
|                                                                                                                                                                                                                                                                                                                                                             | <p>E5</p> <p>Did you have to pay any money at or for <b>triage (e.g for blood sugar)?</b> If yes, ask how much the household paid?</p> <p>Tick <u>all</u> that are applicable</p>                           | <p>_____ Leones Don't know <input type="checkbox"/></p> <p>Who or where was that paid to;</p> <ul style="list-style-type: none"> <li>- Bank in Connaught <input type="checkbox"/></li> <li>- _____ Leones</li> <li>- Directly to hospital staff <input type="checkbox"/></li> <li>- _____ Leones</li> <li>- Other <input type="checkbox"/> specify _____</li> <li>- _____ Leones</li> </ul>                                                                                                                                                       |
|                                                                                                                                                                                                                                                                                                                                                             | <p>E6</p> <p>Did you have to pay any money for any <b>helpers</b> (e.g porters, wheelchair, hospital staff to help you get around etc). If yes, ask how much the household paid?</p>                        | <p>_____ Leones Don't know <input type="checkbox"/></p>                                                                                                                                                                                                                                                                                                                                                                                                                                                                                           |
|                                                                                                                                                                                                                                                                                                                                                             | <p>E7</p> <p>Did you have to pay any <b>doctors' fees / consultation fees?</b> If yes, ask how much the household paid in doctors' fees / consultation fees?</p> <p>Tick <u>all</u> that are applicable</p> | <p>_____ Leones Don't know <input type="checkbox"/></p> <p>Who or where was that paid to;</p> <ul style="list-style-type: none"> <li>- Bank in Connaught <input type="checkbox"/></li> <li>- _____ Leones</li> <li>- Directly to healthcare workers <input type="checkbox"/></li> <li>- _____ Leones</li> <li>- Other <input type="checkbox"/> specify _____</li> <li>- _____ Leones</li> </ul>                                                                                                                                                   |
|                                                                                                                                                                                                                                                                                                                                                             | <p>E8</p> <p>Did you have any <b>laboratory (lab) tests?</b> If yes, ask how much money the household spent on these tests?</p> <p>Tick <u>all</u> that are applicable</p>                                  | <p>_____ Leones Don't know <input type="checkbox"/></p> <p>Who or where was that paid to;</p> <ul style="list-style-type: none"> <li>- Bank in Connaught <input type="checkbox"/></li> <li>- _____ Leones</li> <li>- External lab <input type="checkbox"/></li> <li>- _____ Leones</li> <li>- Internal lab <input type="checkbox"/></li> <li>- _____ Leones</li> <li>- Directly to healthcare workers <input type="checkbox"/></li> <li>- _____ Leones</li> <li>- Other <input type="checkbox"/> specify _____</li> <li>- _____ Leones</li> </ul> |
|                                                                                                                                                                                                                                                                                                                                                             | <p>E9</p> <p>Did you have any <b>x-rays, scans or imaging?</b> If yes, ask how much money your household spent on scans, imaging and x-rays?</p> <p>Tick <u>all</u> that are applicable</p>                 | <p>_____ Leones Don't know <input type="checkbox"/></p> <p>Who or where was that paid to;</p> <ul style="list-style-type: none"> <li>- Bank in Connaught <input type="checkbox"/></li> <li>- _____ Leones</li> <li>- External facility <input type="checkbox"/></li> <li>- _____ Leones</li> <li>- Internal facility <input type="checkbox"/></li> <li>- _____ Leones</li> </ul>                                                                                                                                                                  |

|     |                                                                                                                                                                                                                                                                                                                                                   |                                                                                                                                                                                                                                                                                                                                                                                                                                                                                                                                           |
|-----|---------------------------------------------------------------------------------------------------------------------------------------------------------------------------------------------------------------------------------------------------------------------------------------------------------------------------------------------------|-------------------------------------------------------------------------------------------------------------------------------------------------------------------------------------------------------------------------------------------------------------------------------------------------------------------------------------------------------------------------------------------------------------------------------------------------------------------------------------------------------------------------------------------|
|     |                                                                                                                                                                                                                                                                                                                                                   | <ul style="list-style-type: none"> <li>- Directly to healthcare workers <input type="checkbox"/><br/>_____ Leones</li> <li>- Other <input type="checkbox"/> specify _____<br/>_____ Leones</li> </ul>                                                                                                                                                                                                                                                                                                                                     |
| E10 | Did the patient have an <b>operation or procedure</b> (e.g skin traction/POP/suturing) in hospital?                                                                                                                                                                                                                                               | Yes <input type="checkbox"/> No <input type="checkbox"/> (go to E15)                                                                                                                                                                                                                                                                                                                                                                                                                                                                      |
| E11 | How much did you pay for this <b>operation or procedure</b> ?<br><br>Tick <u>all</u> that are applicable                                                                                                                                                                                                                                          | <p>_____ Leones. Don't know <input type="checkbox"/></p> <p>Who or where was that paid to;</p> <ul style="list-style-type: none"> <li>- Bank in Connaught <input type="checkbox"/><br/>_____ Leones</li> <li>- Directly to healthcare workers <input type="checkbox"/><br/>_____ Leones</li> <li>- Other <input type="checkbox"/> specify _____<br/>_____ Leones</li> </ul>                                                                                                                                                               |
| E12 | Did you have to pay for <b>medications or medical supplies</b> (e.g. cannulas, IV lines, gauze, bandages, dressings, gloves, catheters and other consumables) <b>for theatre / your operation/procedure</b> ? If yes, how much money did your household spend on these medicines and medical supplies?<br><br>Tick <u>all</u> that are applicable | <p>_____ Leones. Don't know <input type="checkbox"/></p> <p>Who or where was that paid to;</p> <ul style="list-style-type: none"> <li>- Bank in Connaught <input type="checkbox"/><br/>_____ Leones</li> <li>- External pharmacy <input type="checkbox"/><br/>_____ Leones</li> <li>- Internal pharmacy / cost recovery <input type="checkbox"/><br/>_____ Leones</li> <li>- Directly to healthcare workers <input type="checkbox"/><br/>_____ Leones</li> <li>- Other <input type="checkbox"/> specify _____<br/>_____ Leones</li> </ul> |
| E13 | Did you have any <b>extra charges once in the operating room /area</b> ? Please specify what this was for.                                                                                                                                                                                                                                        | Yes <input type="checkbox"/> (specify) _____ No <input type="checkbox"/> (go to E15)<br><b>Specify what this was for?</b>                                                                                                                                                                                                                                                                                                                                                                                                                 |
| E14 | How much money did your household spend on these <b>extra-charges in the operating room</b> ?<br><br>Tick <u>all</u> that are applicable                                                                                                                                                                                                          | <p>_____ Leones. Don't know <input type="checkbox"/></p> <p>Who or where was that paid to;</p> <ul style="list-style-type: none"> <li>- Bank in Connaught <input type="checkbox"/><br/>_____ Leones</li> <li>- External pharmacy <input type="checkbox"/><br/>_____ Leones</li> <li>- Internal pharmacy / cost recovery <input type="checkbox"/><br/>_____ Leones</li> <li>- Directly to healthcare workers <input type="checkbox"/><br/>_____ Leones</li> <li>- Other <input type="checkbox"/> specify _____<br/>_____ Leones</li> </ul> |
| E15 | Did your household have to arrange and get <b>blood for transfusion</b> ?                                                                                                                                                                                                                                                                         | Yes <input type="checkbox"/> No <input type="checkbox"/> (go to E18)                                                                                                                                                                                                                                                                                                                                                                                                                                                                      |
| E17 | How much money did your household spend on <b>blood transfusion related costs</b> (including blood bank fees, supplies, paying a donor etc.)<br><br>Tick <u>all</u> that are applicable                                                                                                                                                           | <p>_____ Leones Don't know <input type="checkbox"/></p> <p>Who or where was that paid to;</p> <ul style="list-style-type: none"> <li>- Bank in Connaught <input type="checkbox"/><br/>_____ Leones</li> <li>- External facility <input type="checkbox"/><br/>_____ Leones</li> <li>- Internal facility <input type="checkbox"/><br/>_____ Leones</li> <li>- Directly to healthcare workers <input type="checkbox"/><br/>_____ Leones</li> <li>- Other <input type="checkbox"/> specify _____<br/>_____ Leones</li> </ul>                  |
| E18 | Did you have to pay for any <b>medications in A&amp;E/OPD or on the ward</b> (excluding prescriptions specifically for theatre)? If yes, ask how much the household paid for this?<br><br>Tick <u>all</u> that are applicable                                                                                                                     | <p>_____ Leones Don't know <input type="checkbox"/></p> <p>Who or where was that paid to;</p> <ul style="list-style-type: none"> <li>- Bank in Connaught <input type="checkbox"/><br/>_____ Leones</li> <li>- External pharmacy <input type="checkbox"/><br/>_____ Leones</li> <li>- Internal pharmacy / cost recovery <input type="checkbox"/></li> </ul>                                                                                                                                                                                |



|     |                                                                                                                                                                                                                                                                                                                                      |                                                                                                                                                                                                                                                                                                                                                                                                                                                                                                                             |
|-----|--------------------------------------------------------------------------------------------------------------------------------------------------------------------------------------------------------------------------------------------------------------------------------------------------------------------------------------|-----------------------------------------------------------------------------------------------------------------------------------------------------------------------------------------------------------------------------------------------------------------------------------------------------------------------------------------------------------------------------------------------------------------------------------------------------------------------------------------------------------------------------|
|     |                                                                                                                                                                                                                                                                                                                                      | <p>_____ Leones</p> <p>- Directly to healthcare workers <input type="checkbox"/></p> <p>_____ Leones</p> <p>- Other <input type="checkbox"/> specify _____</p> <p>_____ Leones</p>                                                                                                                                                                                                                                                                                                                                          |
| E19 | <p>Did you have to pay for any <b>medical supplies in A&amp;E/OPD and the Ward</b> (not including medications, e.g. cannulas, IV lines, gauze, bandages, dressings, gloves, catheters and other consumables) (excluding the prescription for theatre)? If yes, ask how much was paid?</p> <p>Tick <u>all</u> that are applicable</p> | <p>_____ Leones. Don't know <input type="checkbox"/></p> <p>Who or where was that paid to;</p> <p>- Bank in Connaught <input type="checkbox"/></p> <p>_____ Leones</p> <p>- External pharmacy / facility <input type="checkbox"/></p> <p>_____ Leones</p> <p>- Internal pharmacy / facility / cost recovery <input type="checkbox"/></p> <p>_____ Leones</p> <p>- Directly to healthcare workers <input type="checkbox"/></p> <p>_____ Leones</p> <p>- Other <input type="checkbox"/> specify _____</p> <p>_____ Leones</p> |
| E20 | <p>Did you have to pay any <b>bed fees</b> (excluding admission fees / book)? If yes, ask how much money the household paid in bed fees?</p> <p>Tick <u>all</u> that are applicable</p>                                                                                                                                              | <p>_____ Leones Don't know <input type="checkbox"/></p> <p>Who or where was that paid to;</p> <p>- Bank in Connaught <input type="checkbox"/></p> <p>_____ Leones</p> <p>- Directly to healthcare workers <input type="checkbox"/></p> <p>_____ Leones</p> <p>- Other <input type="checkbox"/> specify _____</p> <p>_____ Leones</p>                                                                                                                                                                                        |
| E21 | <p>Did your household pay any money for <b>nursing care</b> (requested by nurses for care such as dressing changes etc, not including medications or medical supplies)? If yes, ask how much was paid?</p>                                                                                                                           | <p>_____ Leones Don't know <input type="checkbox"/></p> <p>Who or where was that paid to;</p> <p>- Bank in Connaught <input type="checkbox"/></p> <p>_____ Leones</p> <p>- Directly to healthcare workers <input type="checkbox"/></p> <p>_____ Leones</p> <p>- Other <input type="checkbox"/> specify _____</p> <p>_____ Leones</p>                                                                                                                                                                                        |
| E22 | <p>Did your household give any <b>tips (ahjo)</b> i.e. voluntary and not requested money / gifts to healthcare workers / staff? If yes ask how much this amounted to?</p>                                                                                                                                                            | <p>_____ Leones Don't know <input type="checkbox"/></p>                                                                                                                                                                                                                                                                                                                                                                                                                                                                     |
| E23 | <p>How many <b>family members / attendants / persons stayed in hospital</b> during your hospital stay (excluding visitors)?</p>                                                                                                                                                                                                      | <p>_____ people</p>                                                                                                                                                                                                                                                                                                                                                                                                                                                                                                         |
| E24 | <p><b>Where did they stay</b> and <b>how much</b> did your household pay towards this?</p>                                                                                                                                                                                                                                           | <p>In hospital <input type="checkbox"/></p> <p>Outside accommodation <input type="checkbox"/></p> <p>Other <input type="checkbox"/> specify _____</p> <p>Total cost _____ Leones Don't know <input type="checkbox"/></p>                                                                                                                                                                                                                                                                                                    |
| E25 | <p>During your hospital stay <b>where did you get food from?</b></p> <p>Tick <u>all</u> that are applicable</p>                                                                                                                                                                                                                      | <p>Provided by the hospital <input type="checkbox"/></p> <p>Bought by the patient / household <input type="checkbox"/></p> <p>Brought for the patient by someone else <input type="checkbox"/></p> <p>Other <input type="checkbox"/> specify _____</p>                                                                                                                                                                                                                                                                      |
| E26 | <p>How much did you / your household <b>spend on food</b> during your hospital stay? If they can't give a break down then ask for a total.</p>                                                                                                                                                                                       | <p>On patient _____ Leones Don't know <input type="checkbox"/></p> <p>For attendants _____ Leones Don't know <input type="checkbox"/></p> <p>Total _____ Leones Don't know <input type="checkbox"/></p>                                                                                                                                                                                                                                                                                                                     |
| E27 | <p>Did your household spend any money on transport for all the <b>"running" (transport to get food, hospital supplies, investigations and medications externally, excluding transport for visitors)</b>? If yes ask how much and state what this was for?</p> <p>Tick <u>all</u> that are applicable</p>                             | <p>_____ Leones Don't know <input type="checkbox"/></p> <p><b>What was this for?</b></p> <p>Food for the patients / attendants <input type="checkbox"/></p> <p>Going for tests / investigations outside <input type="checkbox"/></p> <p>Getting medicines / medical supplies <input type="checkbox"/></p> <p>Other <input type="checkbox"/> specify _____</p>                                                                                                                                                               |
| E28 | <p>Did your household have to pay any money at the time of <b>discharge</b>? If yes, ask how much was paid?</p>                                                                                                                                                                                                                      | <p>_____ Leones. Don't know <input type="checkbox"/></p> <p>Who or where was that paid to;</p> <p>- Bank in Connaught <input type="checkbox"/></p> <p>_____ Leones</p> <p>- Directly to healthcare workers <input type="checkbox"/></p> <p>_____ Leones</p>                                                                                                                                                                                                                                                                 |

|     |                                                                                                                                                                  |                                                                                                                                                                                                                                                                                                    |
|-----|------------------------------------------------------------------------------------------------------------------------------------------------------------------|----------------------------------------------------------------------------------------------------------------------------------------------------------------------------------------------------------------------------------------------------------------------------------------------------|
|     |                                                                                                                                                                  | - Other <input type="checkbox"/> specify _____<br>_____ Leones                                                                                                                                                                                                                                     |
| E29 | Did your household have <b>any other illness related / hospital costs (e.g at SOP / other departments visited)</b> ? If yes, specify what these costs where for. | Yes <input type="checkbox"/> (specify and go to E30) No <input type="checkbox"/> (go to F1)<br><b>Specify</b> _____                                                                                                                                                                                |
| E30 | How much did these <b>other costs</b> amount to?                                                                                                                 | _____ Leones. Don't know <input type="checkbox"/><br>Who or where was that paid to;<br>- Bank in Connaught <input type="checkbox"/><br>_____ Leones<br>- Directly to healthcare workers <input type="checkbox"/><br>_____ Leones<br>- Other <input type="checkbox"/> specify _____<br>_____ Leones |

**Section 5: Indirect non-medical expenditure and how costs are met**

**"I will now ask you some questions about the broader implications of the costs and how you have met these costs?"**

| Code | Question                                                                                                                                                                                                                        | Response                                                                                                                                                                                                                                                                                                                                                |
|------|---------------------------------------------------------------------------------------------------------------------------------------------------------------------------------------------------------------------------------|---------------------------------------------------------------------------------------------------------------------------------------------------------------------------------------------------------------------------------------------------------------------------------------------------------------------------------------------------------|
| F1   | Do you have <b>health insurance/medical care</b> to cover any medical costs?                                                                                                                                                    | Yes <input type="checkbox"/> No <input type="checkbox"/> (go to F5)<br>Don't know <input type="checkbox"/>                                                                                                                                                                                                                                              |
| F2   | What <b>type of health insurance</b> do you have?                                                                                                                                                                               | <input type="checkbox"/> Private insurance<br><input type="checkbox"/> Work-related insurance<br><input type="checkbox"/> Other (specify) _____                                                                                                                                                                                                         |
| F3   | What is your <b>monthly contribution towards your insurance</b> (if applicable)?                                                                                                                                                | _____ Leones Don't know <input type="checkbox"/>                                                                                                                                                                                                                                                                                                        |
| F4   | Does <b>this insurance cover all (total) medical costs</b> ?                                                                                                                                                                    | Yes <input type="checkbox"/> No <input type="checkbox"/> If no, how much was paid in addition<br>_____ Leones Don't know <input type="checkbox"/>                                                                                                                                                                                                       |
| F5   | <b>How did your household pay</b> for all the above costs? Tick <u>all</u> that are applicable                                                                                                                                  |                                                                                                                                                                                                                                                                                                                                                         |
|      | <b>Use savings?</b> Yes <input type="checkbox"/> No <input type="checkbox"/> Don't know <input type="checkbox"/>                                                                                                                | How much? _____ Leones Don't know <input type="checkbox"/>                                                                                                                                                                                                                                                                                              |
|      | <b>Borrow money?</b> Yes <input type="checkbox"/> No <input type="checkbox"/> Don't know <input type="checkbox"/>                                                                                                               | How much? _____ Leones<br>Does this need to be paid back? Yes <input type="checkbox"/> No <input type="checkbox"/> Don't know <input type="checkbox"/>                                                                                                                                                                                                  |
|      | <b>Arrange family contributions?</b> Yes <input type="checkbox"/> No <input type="checkbox"/> Don't know <input type="checkbox"/>                                                                                               | How much? _____ Leones<br>Does this need to be paid back? Yes <input type="checkbox"/> No <input type="checkbox"/> Don't know <input type="checkbox"/>                                                                                                                                                                                                  |
|      | <b>Charity money from family/friends outside the country/church/social clubs?</b> Yes <input type="checkbox"/> No <input type="checkbox"/> Don't know <input type="checkbox"/>                                                  | How much? _____ Leones<br>Does this need to be paid back? Yes <input type="checkbox"/> No <input type="checkbox"/> Don't know <input type="checkbox"/>                                                                                                                                                                                                  |
|      | <b>Pledge / pawn any possessions</b> (including livestock, assets including electrical goods, generator, watches, jewellery etc.)? Yes <input type="checkbox"/> No <input type="checkbox"/> Don't know <input type="checkbox"/> | How much money did this raise? _____ Leones<br>Don't know <input type="checkbox"/>                                                                                                                                                                                                                                                                      |
|      | <b>Sell any possessions or land?</b> Yes <input type="checkbox"/> No <input type="checkbox"/> Don't know <input type="checkbox"/>                                                                                               | How much money did this raise? _____ Leones<br>Don't know <input type="checkbox"/>                                                                                                                                                                                                                                                                      |
|      | <b>Any other way of meeting the hospital costs?</b> Yes <input type="checkbox"/> No <input type="checkbox"/> Don't know <input type="checkbox"/>                                                                                | Specify how _____<br>How much money did this raise? _____ Leones<br>Don't know <input type="checkbox"/>                                                                                                                                                                                                                                                 |
| F6   | Did your household have to <b>stop sending any children to school, or pay reduced school fees</b> in order to pay for this hospitalisation?                                                                                     | Yes <input type="checkbox"/> No <input type="checkbox"/> Don't know <input type="checkbox"/>                                                                                                                                                                                                                                                            |
| F7   | Did your household <b>lose any wages</b> due to this hospital stay? If yes, ask how much was lost?                                                                                                                              | Yes <input type="checkbox"/> No <input type="checkbox"/> Don't know <input type="checkbox"/><br>How much was lost _____ Leones<br>Don't know <input type="checkbox"/>                                                                                                                                                                                   |
| F8   | Did you or anyone in your household <b>lose their job or change their role at work or home</b> ?                                                                                                                                | Yes <input type="checkbox"/> No <input type="checkbox"/> Don't know <input type="checkbox"/><br>If yes please specify<br>Lost job <input type="checkbox"/><br>Took up employment / 2 <sup>nd</sup> job <input type="checkbox"/><br>Change of duties in household to meet costs <input type="checkbox"/><br>Other <input type="checkbox"/> specify _____ |

1  
2  
3  
4  
5  
6  
7  
8  
9  
10  
11  
12  
13  
14  
15  
16  
17  
18  
19  
20  
21  
22  
23  
24  
25  
26  
27  
28  
29  
30  
31  
32  
33  
34  
35  
36  
37  
38  
39  
40  
41  
42  
43  
44  
45  
46  
47  
48  
49  
50  
51  
52  
53  
54  
55  
56  
57  
58  
59  
60

Any other comments?

---

---

---

---

For peer review only

STROBE Statement—Checklist of items that should be included in reports of *cross-sectional studies*

|                              | Item No | Recommendation                                                                                                                                                                                    | Page number               |
|------------------------------|---------|---------------------------------------------------------------------------------------------------------------------------------------------------------------------------------------------------|---------------------------|
| <b>Title and abstract</b>    | 1       | (a) Indicate the study's design with a commonly used term in the title or the abstract                                                                                                            | 1-3                       |
|                              |         | (b) Provide in the abstract an informative and balanced summary of what was done and what was found                                                                                               | 1-3                       |
| <b>Introduction</b>          |         |                                                                                                                                                                                                   | <b>4</b>                  |
| Background/rationale         | 2       | Explain the scientific background and rationale for the investigation being reported                                                                                                              | 4                         |
| Objectives                   | 3       | State specific objectives, including any prespecified hypotheses                                                                                                                                  | 4                         |
| <b>Methods</b>               |         |                                                                                                                                                                                                   | <b>5-7</b>                |
| Study design                 | 4       | Present key elements of study design early in the paper                                                                                                                                           | 5                         |
| Setting                      | 5       | Describe the setting, locations, and relevant dates, including periods of recruitment, exposure, follow-up, and data collection                                                                   | 5                         |
| Participants                 | 6       | (a) Give the eligibility criteria, and the sources and methods of selection of participants                                                                                                       | 5                         |
| Variables                    | 7       | Clearly define all outcomes, exposures, predictors, potential confounders, and effect modifiers. Give diagnostic criteria, if applicable                                                          | 5-7                       |
| Data sources/<br>measurement | 8*      | For each variable of interest, give sources of data and details of methods of assessment (measurement). Describe comparability of assessment methods if there is more than one group              | 5-7                       |
| Bias                         | 9       | Describe any efforts to address potential sources of bias                                                                                                                                         | 10-11                     |
| Study size                   | 10      | Explain how the study size was arrived at                                                                                                                                                         | 7                         |
| Quantitative variables       | 11      | Explain how quantitative variables were handled in the analyses. If applicable, describe which groupings were chosen and why                                                                      | 7                         |
| Statistical methods          | 12      | (a) Describe all statistical methods, including those used to control for confounding                                                                                                             | 7                         |
|                              |         | (b) Describe any methods used to examine subgroups and interactions                                                                                                                               | 7                         |
|                              |         | (c) Explain how missing data were addressed                                                                                                                                                       | 7                         |
|                              |         | (d) If applicable, describe analytical methods taking account of sampling strategy                                                                                                                | n/a                       |
|                              |         | (e) Describe any sensitivity analyses                                                                                                                                                             | 7                         |
| <b>Results</b>               |         |                                                                                                                                                                                                   | <b>8-9</b>                |
| Participants                 | 13*     | (a) Report numbers of individuals at each stage of study—eg numbers potentially eligible, examined for eligibility, confirmed eligible, included in the study, completing follow-up, and analysed | 8-9<br>Figure 1           |
|                              |         | (b) Give reasons for non-participation at each stage                                                                                                                                              | Figure 1                  |
|                              |         | (c) Consider use of a flow diagram                                                                                                                                                                | Figure 1                  |
| Descriptive data             | 14*     | (a) Give characteristics of study participants (eg demographic, clinical, social) and information on exposures and potential confounders                                                          | 8<br>Table 1              |
|                              |         | (b) Indicate number of participants with missing data for each variable of interest                                                                                                               | Table 1                   |
| Outcome data                 | 15*     | Report numbers of outcome events or summary measures                                                                                                                                              | 8-9<br>Table 1<br>Table 2 |

Table 3

Table 4

|                          |    |                                                                                                                                                                                                              |                     |
|--------------------------|----|--------------------------------------------------------------------------------------------------------------------------------------------------------------------------------------------------------------|---------------------|
| Main results             | 16 | (a) Give unadjusted estimates and, if applicable, confounder-adjusted estimates and their precision (eg, 95% confidence interval). Make clear which confounders were adjusted for and why they were included | n/a                 |
|                          |    | (b) Report category boundaries when continuous variables were categorized                                                                                                                                    | 8-9<br>Tables       |
|                          |    | (c) If relevant, consider translating estimates of relative risk into absolute risk for a meaningful time period                                                                                             | n/a                 |
| Other analyses           | 17 | Report other analyses done—eg analyses of subgroups and interactions, and sensitivity analyses                                                                                                               | Appendix<br>1, 2, 3 |
| <b>Discussion</b>        |    |                                                                                                                                                                                                              | <b>9 - 10</b>       |
| Key results              | 18 | Summarise key results with reference to study objectives                                                                                                                                                     | 9-10                |
| Limitations              | 19 | Discuss limitations of the study, taking into account sources of potential bias or imprecision. Discuss both direction and magnitude of any potential bias                                                   | 10-11               |
| Interpretation           | 20 | Give a cautious overall interpretation of results considering objectives, limitations, multiplicity of analyses, results from similar studies, and other relevant evidence                                   | 9-10                |
| Generalisability         | 21 | Discuss the generalisability (external validity) of the study results                                                                                                                                        | 10                  |
| <b>Other information</b> |    |                                                                                                                                                                                                              |                     |
| Funding                  | 22 | Give the source of funding and the role of the funders for the present study and, if applicable, for the original study on which the present article is based                                                | 1                   |

\*Give information separately for exposed and unexposed groups.

**Note:** An Explanation and Elaboration article discusses each checklist item and gives methodological background and published examples of transparent reporting. The STROBE checklist is best used in conjunction with this article (freely available on the Web sites of PLoS Medicine at <http://www.plosmedicine.org/>, Annals of Internal Medicine at <http://www.annals.org/>, and Epidemiology at <http://www.epidem.com/>). Information on the STROBE Initiative is available at [www.strobe-statement.org](http://www.strobe-statement.org).

# BMJ Open

## What is the financial burden to patients of accessing surgical care in Sierra Leone? A cross-sectional survey of catastrophic and impoverishing expenditure

|                                 |                                                                                                                                                                                                                                                                                                                                                                                                                                                                                                                                                                                                                                                            |
|---------------------------------|------------------------------------------------------------------------------------------------------------------------------------------------------------------------------------------------------------------------------------------------------------------------------------------------------------------------------------------------------------------------------------------------------------------------------------------------------------------------------------------------------------------------------------------------------------------------------------------------------------------------------------------------------------|
| Journal:                        | <i>BMJ Open</i>                                                                                                                                                                                                                                                                                                                                                                                                                                                                                                                                                                                                                                            |
| Manuscript ID                   | bmjopen-2020-039049.R2                                                                                                                                                                                                                                                                                                                                                                                                                                                                                                                                                                                                                                     |
| Article Type:                   | Original research                                                                                                                                                                                                                                                                                                                                                                                                                                                                                                                                                                                                                                          |
| Date Submitted by the Author:   | 26-Oct-2020                                                                                                                                                                                                                                                                                                                                                                                                                                                                                                                                                                                                                                                |
| Complete List of Authors:       | Phull, Manraj ; West Hertfordshire Hospitals NHS Trust<br>Grimes, Caris; King's College London Faculty of Life Sciences and Medicine; Medway NHS Foundation Trust<br>Kamara, Thaim; University of Sierra Leone College of Medicine and Allied Health Sciences, Surgery<br>Wurie, Haja ; University of Sierra Leone College of Medicine and Allied Health Sciences<br>Leather, Andy; King's College London Faculty of Life Sciences and Medicine, King's Centre for Global Health<br>Davies, Justine ; King's College London Faculty of Life Sciences and Medicine, Centre for Global Health; University of Birmingham Institute of Applied Health Research |
| <b>Primary Subject Heading</b>: | Health economics                                                                                                                                                                                                                                                                                                                                                                                                                                                                                                                                                                                                                                           |
| Secondary Subject Heading:      | Global health, Health policy, Surgery                                                                                                                                                                                                                                                                                                                                                                                                                                                                                                                                                                                                                      |
| Keywords:                       | SURGERY, HEALTH ECONOMICS, Health policy < HEALTH SERVICES ADMINISTRATION & MANAGEMENT                                                                                                                                                                                                                                                                                                                                                                                                                                                                                                                                                                     |
|                                 |                                                                                                                                                                                                                                                                                                                                                                                                                                                                                                                                                                                                                                                            |

SCHOLARONE™  
Manuscripts



I, the Submitting Author has the right to grant and does grant on behalf of all authors of the Work (as defined in the below author licence), an exclusive licence and/or a non-exclusive licence for contributions from authors who are: i) UK Crown employees; ii) where BMJ has agreed a CC-BY licence shall apply, and/or iii) in accordance with the terms applicable for US Federal Government officers or employees acting as part of their official duties; on a worldwide, perpetual, irrevocable, royalty-free basis to BMJ Publishing Group Ltd ("BMJ") its licensees and where the relevant Journal is co-owned by BMJ to the co-owners of the Journal, to publish the Work in this journal and any other BMJ products and to exploit all rights, as set out in our [licence](#).

The Submitting Author accepts and understands that any supply made under these terms is made by BMJ to the Submitting Author unless you are acting as an employee on behalf of your employer or a postgraduate student of an affiliated institution which is paying any applicable article publishing charge ("APC") for Open Access articles. Where the Submitting Author wishes to make the Work available on an Open Access basis (and intends to pay the relevant APC), the terms of reuse of such Open Access shall be governed by a Creative Commons licence – details of these licences and which [Creative Commons](#) licence will apply to this Work are set out in our licence referred to above.

Other than as permitted in any relevant BMJ Author's Self Archiving Policies, I confirm this Work has not been accepted for publication elsewhere, is not being considered for publication elsewhere and does not duplicate material already published. I confirm all authors consent to publication of this Work and authorise the granting of this licence.

1  
2  
3  
4  
5  
6  
7

## What is the financial burden to patients of accessing surgical care in Sierra Leone? A cross-sectional survey of catastrophic and impoverishing expenditure.

8 Manraj Phull (1), Caris E Grimes (2, 3), Thaim B Kamara (4), Haja Wurie (5), Andrew JM Leather (2) \*  
9 and Justine Davies (2, 6, 7, 8) \*

11  
12 \*Co-senior authors

13  
14 Authors

15  
16 Manraj Phull BSc MBBS MRCS MSc

17 1) West Hertfordshire Hospitals NHS Trust. Watford General Hospital, Watford, Hertfordshire, UK

18  
19 Caris E Grimes BSc MBBS MEd FRCS MD

20 2) King's Centre for Global Health and Health Partnerships, School of Population Health and  
21 Environmental Sciences, King's College London, London, SE5 9RJ, UK

22 3) Medway NHS Foundation Trust, Gillingham, Kent, UK

23  
24 Thaim B Kamara MBChB, FWACS

25 4) College of Medicine and Allied Health Sciences, Freetown, Sierra Leone

26  
27 Haja Wurie

28 5) College of Medicine and Allied Health Sciences, Freetown, Sierra Leone

29  
30 Andrew JM Leather MBBS, FRCS, MS

31 2) King's Centre for Global Health and Health Partnerships, School of Population Health and  
32 Environmental Sciences, King's College London, London, SE5 9RJ, UK

33  
34 Justine Davies (Corresponding Author) MBChB, MD (res), MRCP

35 2) King's Centre for Global Health and Health Partnerships, School of Population Health and  
36 Environmental Sciences, King's College London, London, SE5 9RJ, UK

37 6) Institute for Applied Health Research, University of Birmingham, Edgbaston, Birmingham B15 2TT  
38 UK

39 7) Medical Research Council/Wits University Rural Public Health and Health Transitions Research  
40 Unit, Faculty of Health Sciences, School of Public Health, University of the Witwatersrand,  
41 Johannesburg, South Africa

42 8) Centre for Global Surgery, Department of Public Health, Stellenbosch University, South Africa

43  
44 Correspondence to Justine Davies: [J.Davies.6@bham.ac.uk](mailto:J.Davies.6@bham.ac.uk)



## Abstract

**Objectives:** To measure the financial burden associated with accessing surgical care in Sierra Leone.

**Design:** A cross-sectional survey conducted with patients at the time of discharge from tertiary level care. This captured demographics, yearly household expenditure, direct medical, direct non-medical, and indirect costs for surgical care, and summary household assets. Missing data were imputed.

**Setting:** The main tertiary level hospital in Freetown, Sierra Leone.

**Participants:** 335 surgical patients under the care of the hospital surgical team receiving operative or non-operative surgical care on the surgical wards.

**Outcome measures:** Rates of catastrophic expenditure (CE) (a cost > 10% of annual expenditure), impoverishment (being pushed into, or further into, poverty as a result of surgical care costs), amount of out-of-pocket (OOP) costs, and means used to meet these costs were derived.

**Results:** Of 335 patients interviewed, 39% were female and 80% were urban dwellers. Median yearly household expenditure was US\$3569. Mean OOP costs were US\$243, of which a mean of US\$24 (10%) was spent pre-hospital. Of costs incurred during the hospital admission, direct medical costs were US\$138 (63%) and US\$34 (16%) were direct non-medical costs. US\$46 (21%) were indirect costs. Catastrophic expenditure affected 18% of those interviewed. Concerning impoverishment, 45% of patients were already below the national poverty line prior to admission, and 9% of those who were not were pushed below the poverty line following payment for surgical care. 84% of patients used household savings to meet OOP costs. Only 2% (6 patients) had health insurance.

**Conclusion:** Obtaining surgical care has substantial economic impacts on households which pushes them into poverty or further into poverty. The much-needed scaling up of surgical care needs to be accompanied by financial risk protection.

## Article Summary

### Strengths and Limitations

- Use of exit interviews to provide in depth data on costs of accessing surgical care.
- Thorough and detailed capture of household expenditure.
- Provides reliable estimates of OOP, catastrophic, and impoverishing expenditure as well as sources of financing.
- Data captured in one hospital only, although that is the major surgical care centre for the country.
- Only examines those who accessed care and doesn't allow exploration of costs as a limitation to accessing care.

## Introduction

An estimated 33 million individuals globally face financial catastrophe through payment for surgery and anaesthetic care each year. Furthermore 3-7 billion people have been estimated to be at risk of catastrophic expenditure (CE – defined as a total out-of-pocket (OOP) health payment that exceeds a set threshold of the household's annual income or expenditure) due to a lack of financial risk protection (FRP).<sup>1,2</sup> Surgical conditions make up 30% of the global burden of disease and globally an additional 143 million surgical procedures are required annually to meet the current unmet surgical need.<sup>1,3</sup> To ensure universal health coverage, it is therefore essential that FRP is prioritised alongside the scaling up of surgical care. The Lancet Commission on Global Surgery (LCoGS) stated a target of 100% financial protection by 2030 for people accessing surgical care, and FRP indicators for surgery are now included within the World Development Indicators (WDI).<sup>4</sup> Despite this, there is little information on financial implications of accessing surgery in the literature beyond modelled studies,<sup>1,2,5</sup> many of which have been based on few real-world data-points.

Worldwide modelled data on CE and impoverishing expenditure (IE – defined as being pushed into or further into poverty) related to surgical care reveals that those most affected are individuals in low- and middle-income countries (LMICs).<sup>1,2,6</sup> Modelling studies from Sierra Leone, classed as “least developed” by the UN, and with a population of 7 million reflects these findings; between 84.7% and 49.9% of the population in Sierra Leone is estimated to be at risk of CE if they require surgery. Estimated average OOP costs for major surgery in the country were US\$117.60, which put 73.3% to 59.2% of the population at risk of impoverishment.<sup>5,7</sup> However, there are no empirical data to validate these estimates. The estimated unmet surgical burden of disease in Sierra Leone is huge, at 92%, as a result of the historical neglect of surgical care both nationally and globally.<sup>8-10</sup> To enable effective planning of surgical services in future, an accurate understanding of the financial implications of accessing surgical services is required.

In Sierra Leone, as in many LMICs, payments for healthcare are upfront, complex, and not immediately apparent from hospital listed service charges. In addition, hospital listed charges – where they exist – may not reflect the total facility-incurred costs that patients pay during their hospitalisation. These include direct medical costs which are charges for the payment of medical care and direct non-medical costs which include items such as transport to the hospital and food. In addition, substantial costs of care may be incurred prior to the hospitalisation episode. For example, there may be direct medical costs at other healthcare facilities visited prior to the definitive admission. Finally, there are indirect costs (e.g. loss of wages whilst receiving care) that patients, and in some cases their caregivers, experience in their illness, which also impact upon ability to access care. Two ways of capturing these costs is the measurement of IE or CE. The two most widely used thresholds for CE are an expense of > 10% of total annual expenditure or > 40% of non-subsistence expenditure (i.e. household expenditure net of subsistence costs, as a means of capturing the ability to pay).<sup>11-14</sup>

This study aimed to measure the financial burden associated with receiving surgical care in Sierra Leone by using an exit survey to determine a) direct medical, direct non-medical, and indirect OOP costs to pay for a surgical care episode b) the rate of impoverishment and catastrophic expenditure, c) the wealth characteristics of the population accessing surgical care relative to that of the general Sierra Leonean population, d) the factors associated with higher costs of hospital care, e) the in-hospital payment mechanism (i.e. where and to whom the OOP payments are being made), and f) how costs of accessing surgical care are met, and the factors associated with meeting costs of care.

## Methods

### Setting

1  
2  
3 This study was done in the main tertiary referral centre in Sierra Leone, located in the central part of  
4 greater Freetown, and where the majority of surgical care in the countries' non charitable sector is  
5 done. It is a 400-bed hospital with 150 beds dedicated to surgical care. Surgical care is delivered in 5  
6 of the 10 wards, an accident and emergency department with a trauma ward for short stay (< 24hrs)  
7 emergency surgical patients, a surgical outpatient unit, an intensive care unit and five operating  
8 theatres. The average surgical volume is 80 -100 operations per month.<sup>15</sup> The surgical department is  
9 run by 8 surgical and 2 anaesthetic consultants covering six specialities: general surgery, surgical  
10 oncology, urology, paediatrics, trauma and orthopaedics, and ear, nose and throat (ENT) surgery.  
11 Obstetric and gynaecological surgical care is delivered at a nearby tertiary referral hospital dedicated  
12 to women's health, where all pregnant and lactating women receive free healthcare under the  
13 government's free health care initiative and therefore not included in this study.  
14  
15

### 16 **Participants**

17 Participants were all surgical patients who consented to take part, receiving operative or non-  
18 operative surgical care under the care of the hospital surgical team and located on one of the surgical  
19 wards. Patients under the care of non-surgical teams; patients under the age of 16 who were without  
20 a parent, guardian, or head of the household; and participants unable to consent and/or unwilling to  
21 take part in the study were excluded. Participants were recruited consecutively to the study on  
22 admission for surgical care from June to August 2018.  
23  
24

### 25 **Data collection**

26 A structured questionnaire was administered to patients and/or their relatives at the time of formal  
27 discharge from surgical care while patients were on the ward. Where patients self-discharged or left  
28 against medical advice, where possible they were interviewed when leaving the hospital. Interviews  
29 were conducted in a private space and all participants were encouraged to bring a relative, head of  
30 the household, or the main breadwinner to allow for expenditure and OOP costs to be captured  
31 accurately.  
32  
33

34 The questionnaire was designed based on tools used in similar studies done in LMIC settings.<sup>16-19</sup> It  
35 was co-designed with in-country experts, healthcare professionals, and researchers to ensure that the  
36 questions were suitable for the Sierra Leone context. The questionnaire was pilot-tested for ease of  
37 comprehension, clarity of definitions, appropriateness of questions, and manageability of the length  
38 of the interview in six patients (who were excluded from the analysis). Minor modifications were made  
39 to the wording of the questions based on this, but the meaning of the questions was not changed.  
40 The questionnaire was designed and written in English and administered by trained Sierra Leonean  
41 research assistants (RAs) in either English or a chosen local dialect (most commonly Krio). Data was  
42 captured on paper and later transferred to electronic format.  
43  
44

### 45 **Definition and construction of variables**

46 Data was collected on the participants' age, gender and address (later used to determine if they were  
47 resident in an urban or rural area). The occupation of the main breadwinner was recorded using free  
48 text followed by a question on whether this was salaried (i.e. employed) or non-salaried (i.e. self-  
49 employed or working in the informal sector). Education was captured as the highest level of education  
50 of the main breadwinner. Information on household expenditure was captured by asking 7 questions  
51 on regular items purchased in a typical week (food and drink etc.), 11 questions on larger expenditure  
52 items typically purchased monthly (toiletries, clothing, etc.) and a further 12 questions on typical  
53 yearly spend on big household items such as furniture and livestock (see Appendix 1). Total food  
54 expenditure ( $foodexp_h$ ) was summed as a separate variable for the purposes of calculating CE (where  
55 food expenditure was used to define subsistence costs). Number of people living in the household  
56 ( $HHsize$ ) was also captured, as was the number of days of sickness before presentation, whether care  
57  
58  
59  
60

had been sought elsewhere prior to presentation at Connaught Hospital, and the mode of transport used.

Data was also collected on the following: whether the patient was an emergency or elective case; whether or not the participant was eligible for free healthcare (for patients under the age of 5 years old, pregnant or lactating mothers, Ebola survivors, destitute and disabled patients); and the primary diagnosis, recorded from review of the patient's admission notes, ward and theatre ledgers (later summarised into 10 categories of surgical conditions: trauma, hernia, abdominal conditions, peripheral vascular disease or diabetic foot disease, urological conditions, breast mass / cancer, burns, ENT / dental disease, thyroid, congenital abnormality, or paediatrics. Treatment was categorised as operative or non-operative following review of the patient's admission notes. Length of hospital stay was also calculated.

Direct medical OOP costs were captured across the entire illness episode including in-hospital costs (from the point of admission to discharge from the tertiary care hospital) and pre-hospital costs (for other medical costs related to the admission episode which occurred prior to the tertiary care admission). In-hospital direct medical costs were the sum of administrative costs (including registration, admission, triage, bed and discharge fees), medications, medical supplies, investigations, blood transfusion, operation cost, and informal payments (defined as any payment that was not part of hospital policy, such as doctors' fees, tips, payments made to porters and to nursing staff for nursing care). If costs were 'formal', we asked whether these costs were paid directly to the hospital bank / cashiers directly or via hospital staff, or to an external facility (such as external pharmacy or laboratory). For pre-hospital care, non-medical direct costs were calculated from transport costs. For the hospital episode, non-medical direct costs were captured as: cost of transport to the hospital or to and from the hospital to get food, medical supplies and investigations from external facilities, and the cost of food and accommodation during the hospital stay. Finally, indirect costs were captured by estimating lost wages during the illness episode.

All costs are presented in Le and \$US at the conversion rate of 15<sup>th</sup> July 2019 (1 Sierra Leonean Leone = 0.00011567 USD).

Total household expenditure ( $totalexp_h$ ) was calculated over the course of 12 months by summing all the variables collected on all regular household items purchased as described above.

*Total OOP payments for surgical care ( $OOP_t$ ): = total direct medical costs + total direct non-medical costs + total indirect costs*

Catastrophic expenditure (CE) is most widely defined as either an expense more than 10% of total annual expenditure or an expense of more than 40% of non-subsistence expenditure (i.e. household expenditure net of subsistence [here, food ( $foodexp_h$ )] costs). We considered 10% of total household expenditure to be our main outcome of CE, but present results from the 40% of non subsistence expenditure as a sensitivity analysis.

CE was therefore present if:  $\frac{OOP_t}{totalexp_h} > 0.1$

In the sensitivity analysis, using the threshold of 40% of non subsistence expenditure, CE was present

if  $\frac{OOP_t}{totalexp_h - foodexp_h} > 0.4$

:

1  
2  
3 Impoverishing Expenditure (IE) is defined as being pushed into or further into poverty. The Sierra  
4 Leone national poverty line (spending < \$1.25/person /day) threshold was used for the main analysis.  
5 In addition, two further thresholds for poverty were used based on World Bank definitions: “poverty”  
6 - spending < \$3.10/person/day and “extreme poverty” - spending < \$1.90/person/day.<sup>4</sup> Presence of  
7 poverty before (baseline) and after OOP spending on surgical care were then calculated.  
8  
9

10 Baseline poverty ( $BLP_h$ ) at each threshold was determined to be present if total household expenditure  
11 ( $totalexp_h$ ) per individual inhabiting each household divided by the number of days in the year was

12  
13 below the poverty threshold chosen. i.e.:  $\frac{\left(\frac{totalexp_h}{HHsize}\right)}{365} \leq poverty\ line$   
14  
15

16 Impoverishment as a result of surgical care was defined as present if the total household expenditure  
17 net the total OOP costs for surgical care ( $totalexp_{netsurg} = totalexp_h - OOP_t$ ) per head of household, per  
18 day was less than the chosen poverty threshold

19  
20 i.e.: IE present if  $\frac{\left(\frac{totalexp_{netsurg}}{HHsize}\right)}{365} \leq poverty\ line$   
21  
22

23 Both CE and IE are presented as the number and percentage of participants who experienced CE and  
24 or IE.  
25

26 Summary household asset data was collected using a yes or no response to the ownership of the  
27 following assets: Electricity / Light, Mobile phone, Radio, Television, Computer, Refrigerator,  
28 Generator, Bicycle, Motorcycle and Car or truck.  
29  
30

### 31 **Sample size and power calculation**

32 Sample size was calculated using the USCF online calculator<sup>20</sup>. Based on a similar study done in Uganda  
33 which estimated CE to be 31%<sup>16</sup> in a free healthcare setting, modelled and World Bank data for Sierra  
34 Leone which estimates CE at 84.7% and 49.9% respectively, and from discussion with academics with  
35 in-country knowledge, we estimated that CE would be around 60% of patients admitted for surgical  
36 care. The sample size required to capture this with a CI of 55-65%, allowing for 10% loss to follow up  
37 was 442 patients.  
38  
39

### 40 **Statistical analysis**

41 Statistical analysis was done using SPSS Version 25 for windows.  
42  
43

44 Characteristics of the population seeking care are described. Normally distributed data are presented  
45 as mean and standard deviation (SD), otherwise median, IQR and range are used. Multiple Imputation  
46 Chained Equations were used to compute missing data-points using predictive mean matching for  
47 variables with less than 20% missingness and where missingness was identified as not at random.  
48 Where imputed variables were used, the pooled mean is shown as standard SPSS output. A complete  
49 case analysis was done for variables describing how costs of accessing care were met and the  
50 consequences of accessing care.  
51

52 Wealth characteristics (household asset ownership) of the population accessing surgical care were  
53 compared with those in the general population (2015 Census data<sup>21</sup>) using the Chi squared test.  
54  
55

56 Associations between direct medical in-hospital OOP costs of care and age, sex, type of admission  
57 (emergency or elective), operative or non-operative care, type of operative procedure, or length of  
58 stay were tested using a generalised linear model using a Tweedie function with a power of 1.9.  
59  
60

### **Ethical approval**

Ethical approval was granted by the Sierra Leone Ethics and Scientific Review Committee and from the King's College London Research Ethics Committee (ref. LRU-17/18-6455)

All patients gave written consent to participate where possible and witnessed thumbprints and verbal consent where patients were illiterate. Patients were given information about the study at admission and consented between 4-24 hours later after due time was given to consider the study information. Consent was re-confirmed just prior to doing the exit interview.

## Results

Of the initial 416 recruited participants, a total of 335 were interviewed (Figure 1). Participant characteristics are presented in table 1. In summary, the mean age of the interviewed patients was 28 (SD 20). 39% were female and 80% lived in an urban area. 29% were formally employed with a further 66.9% being employed but without a regular salary – either self-employed or employed within the informal sector. The level of education of the main breadwinner was secondary school in 38%, college / university in 28% and no formal education in 24%. The median household size was 6 (IQR: 4, range: 4-8) with a mean total yearly household expenditure of US\$3569 (see appendix table 2 for imputed and non-imputed data and appendix table 3 for a comparison with expenditure assessed in the Economic and Financial survey in 2014<sup>22</sup>). 67% of participants had sought care for their illness elsewhere prior to presentation at the tertiary referral hospital. 72% arrived by public transport and the majority were classed as emergency admissions (72%). The most common reasons for presentation were trauma, hernia, or other abdominal conditions. 68% underwent operative intervention with the remainder being managed by non-operative measures. Median length of stay was 8 days (IQR: 18, range: 3-21).

**Table 1: Participant characteristics**

| <b>Demographics of participants</b>                                              |                |
|----------------------------------------------------------------------------------|----------------|
| Total number of patients interviewed                                             | 335            |
| Mean age in years (SD)                                                           | 28 (20)        |
| Female number (%)                                                                | 132 (39%)      |
| Urban Residents (%)                                                              | 269 (80%)      |
| <b>Type of job (number (%)):</b>                                                 |                |
| Self Employed / Informal Sector                                                  | 224 (67%)      |
| Employed                                                                         | 97 (29%)       |
| Unemployed / Retired                                                             | 12 (4%)        |
| Missing / Don't know                                                             | 2 (1%)         |
| <b>Level of education of main breadwinner (number (%)):</b>                      |                |
| No formal education                                                              | 79 (24%)       |
| Primary school                                                                   | 25 (8%)        |
| Secondary school                                                                 | 127 (38%)      |
| College / University                                                             | 94 (28%)       |
| Other / Missing / Don't know                                                     | 10 (3%)        |
| Median household size (IQR, (range))                                             | 6 (4, (4-8))   |
| Total yearly household expenditure (US\$)                                        | \$ 3,569       |
| Number below national poverty line prior to illness                              | 151 (45%)      |
| <b>Surgical Care Episode Descriptors</b>                                         |                |
| Median days of sickness before presentation (IQR, (range))                       | 2 (14, (0-14)) |
| Number that sought care for illness elsewhere prior to presentation at Connaught | 225 (67%)      |

|                                                                   |                |
|-------------------------------------------------------------------|----------------|
| <b>Mode of transport used to travel to hospital (number (%)):</b> |                |
| Public transport                                                  | 241 (72%)      |
| Ambulance                                                         | 67 (20%)       |
| Private transport                                                 | 23 (7%)        |
| Walked                                                            | 3 (1%)         |
| Don't know / Missing                                              | 1 (0%)         |
| Emergency admission (%)                                           | 242 (72%)      |
| Eligible for free health care (%)*                                | 70 (21%)       |
| <b>Primary diagnosis by surgical condition (number (%))</b>       |                |
| Trauma                                                            | 114 (34%)      |
| Hernia                                                            | 58 (17%)       |
| Abdominal conditions                                              | 56 (17%)       |
| Peripheral vascular disease or diabetic foot disease              | 27 (8%)        |
| Urological conditions                                             | 23 (7%)        |
| Breast mass / cancer                                              | 16 (5%)        |
| Burns                                                             | 15 (5%)        |
| ENT / dental disease                                              | 13 (4%)        |
| Goitre                                                            | 7 (2%)         |
| Congenital abnormality (paediatrics)                              | 3 (1%)         |
| Missing / don't know                                              | 3 (1%)         |
| <b>Treatment (number (%)):</b>                                    |                |
| Operative                                                         | 226 (68%)      |
| Non-operative                                                     | 109 (33%)      |
| Median length of hospital stay (LOS) in days (IQR, (range))       | 8 (18, (3-21)) |

\* Eligible for free health care indicates those that fall under the government Free Health Care Initiative (FHCI); a health financing policy introduced in 2010 aimed to significantly improve maternal and child health through the provision of free healthcare services for all children under 5, pregnant and lactating women. This was later extended to include Ebola survivors.

The total mean cost for the surgical care episode was US\$243 of which US\$24 (10%) accounted for pre-hospital direct costs (medical costs were US\$21 and non-medical were US\$3). Of the in-hospital direct costs (mean US\$172), a mean of US\$138 (63%) was due to direct medical costs and US\$34 (16%) for direct non-medical costs. Indirect costs, such as lost wages, totalled US\$46. (Table 2 and appendix table 4).

**Table 2: Out-of-pocket costs.**

| Costs                                                      | Imputed mean cost (\$US (% of subtotal)) |
|------------------------------------------------------------|------------------------------------------|
| <b>Prehospital costs</b>                                   |                                          |
| <b>Direct pre-hospital medical OOP costs (total)</b>       | <b>21 (88% of 24)</b>                    |
| - Consultation                                             | 2 (10% of 21)                            |
| - Medications                                              | 12 (57% of 21)                           |
| - Medical supplies                                         | 2 (10% of 21)                            |
| - Investigations                                           | 4 (19% of 21)                            |
| - Other miscellaneous                                      | 2 (10% of 21)                            |
| <b>Direct (pre-hospital) non-medical OOP costs (total)</b> | <b>3 (13% of 24)</b>                     |
| - Transport                                                | 3 (100% of 3)                            |
| <b>Total pre-hospital costs</b>                            | <b>24 (10% of 243)</b>                   |

|                                         |                         |
|-----------------------------------------|-------------------------|
| <b>In hospital costs</b>                |                         |
| <b>Direct medical OOP costs (total)</b> | <b>138 (63% of 219)</b> |
| - Administrative                        | 20 (14% of 138)         |
| - Medications                           | 26 (19% of 138)         |
| - Medical supplies                      | 14 (10% of 138)         |
| - Investigations                        | 15 (11% of 138)         |
| - Blood transfusion                     | 9 (7% of 138)           |
| - Total operation costs                 | 49 (36% of 138)         |
| - Unofficial costs                      | 6 (4% of 138)           |
| - Other / miscellaneous                 | 1 (1% of 138)           |
| <b>Direct non-medical costs (total)</b> | <b>34 (16% of 219)</b>  |
| - Transport to hospital                 | 7 (21% of 34)           |
| - Food                                  | 20 (59% of 34)          |
| - Accommodation                         | 0 (0% of 34)            |
| - Other*                                | 7 (21% of 34)           |
| <b>Indirect costs</b>                   |                         |
| - Lost wages                            | 46 (100% of 46)         |
| <b>TOTAL OOP COSTS</b>                  | <b>243</b>              |

\*other relates to travel and other associated costs incurred as a result for needed investigations from and or medication / supplies from an external facility. SPSS calculates only the mean using imputed variables, hence no standard deviation is displayed.



Of the in-hospital direct medical costs, 48% were given to hospital staff (it was not clear whether the hospital staff later transferred these funds to the hospital bank or not), 33% were made directly to the hospital bank / cashiers and 17% to an external facility such as external pharmacy or diagnostic centre (Appendix table 5).

A variety of means were used to meet costs and participants were allowed to mention more than one means of covering costs (Table 3). Most (84% of patients) used their savings to meet some or all of the costs, with family contributions, borrowing money and charitable donations forming the 2<sup>nd</sup>, 3<sup>rd</sup> and 4<sup>th</sup> most frequently used means of meeting OOP payments, respectively. Only 2% (6 patients) had some form of health insurance. Wider implications included loss of wages in 37% and loss of job in 6.0%.

**Table 3: How costs are met and the wider implications of seeking and undergoing surgical care (n is the number of cases with data on each variable)**

| How costs were met (total number responding to question)            | Number (%) that used this as a means of meet OOP costs                  |
|---------------------------------------------------------------------|-------------------------------------------------------------------------|
| Used <b>Savings</b> (n=326)                                         | <b>273 (84%)</b>                                                        |
| Arranged <b>family contributions</b> (n=331)                        | <b>128 (39%)</b>                                                        |
| <b>Borrowed</b> money (n=331)                                       | <b>102 (31%)</b>                                                        |
| Received <b>charity</b> money (n = 331)                             | <b>83 (25%)</b>                                                         |
| <b>Sold possessions</b> (n=329)                                     | <b>17 (5%)</b>                                                          |
| <b>Other</b> (n=331)                                                | <b>14 (4%)</b>                                                          |
| <b>Pawned</b> possessions (n=332)                                   | <b>8 (2%)</b>                                                           |
| Have <b>Health insurance</b> (n=335)                                | <b>6 (2%)</b>                                                           |
| Wider implications                                                  | Number (%) that experienced the wider implications of meeting OOP costs |
| <b>Loss of wages</b> (n = 328)                                      | <b>121 (37%)</b>                                                        |
| <b>Lost their job</b> / changed their role at work / home (n = 331) | <b>20 (6.0%)</b>                                                        |
| <b>Disruption to education</b> (n = 333)                            | <b>12 (4%)</b>                                                          |

Catastrophic expenditure, when defined as OOP costs of more than 10% of all household expenditure affected 18% of those interviewed. In the sensitivity analysis using the threshold of more than 40% of non-subsistence expenditure, catastrophic expenditure affected 10% of those interviewed..

Prior to the surgical care episode, 45% of people interviewed were below the national poverty line, 90% were below the World Bank Poverty Level, and 70% below the World Bank Extreme Poverty level. Following payment for surgical care, 50% were pushed below or further below the national poverty line. Corresponding figures were 91% and 73%, for the World Bank thresholds of poverty and extreme poverty, respectively.

Analysis of the possession of household assets demonstrated that those interviewed were more likely to have electricity, a mobile phone, radio, television, refrigerator, bicycle, motorcycle or car than those of the general population in Sierra Leone (2015 Census data, all  $p < 0.001$ ) or of the urban population in the Western Area (2015 Census data, all  $p < 0.05$ ) (Table 4).

**Table 4: Ownership of household assets in comparison to 2015 census data**

| Household assets | Surgical cohort | 2015 Census data<br>Whole country data |
|------------------|-----------------|----------------------------------------|
|------------------|-----------------|----------------------------------------|

|                     | Number (%) of households that own the asset |        |
|---------------------|---------------------------------------------|--------|
| <b>Electricity</b>  | 227 (67.8%)                                 | 17.8%  |
| <b>Mobile phone</b> | 326 (97.3%)                                 | 62.94% |
| <b>Radio</b>        | 280 (83.6%)                                 | 58.03% |
| <b>Television</b>   | 212 (63.3%)                                 | 19.76% |
| <b>Refrigerator</b> | 119 (35.5%)                                 | 8.22%  |
| <b>Bicycle</b>      | 38 (11.3%)                                  | 6.43%  |
| <b>Motorcycle</b>   | 8 (14.3%)                                   | 7.62%  |
| <b>Car</b>          | 50 (14.9%)                                  | 3.65%  |

For peer review only

1  
2  
3  
4 Regression analysis demonstrated that the factors associated with greater costs were older age,  
5 longer length of hospital stay and undergoing a general surgical or urological procedure (Appendix  
6 table 6).  
7

## 8 **Discussion**

9  
10 In this study, we found that accessing and receiving tertiary level surgical care in Sierra Leone requires  
11 large up-front OOP payments which have a substantial impact on individual and households' economic  
12 situations. These equate to a catastrophic expense in nearly a fifth of households and are  
13 impoverishing half of the households that receive care. We found poverty, as assessed by household  
14 expenditure, was high, indicating a limited financial buffer to accommodate costs of care. This is  
15 despite most people who access surgical care owning a higher level of assets than the general  
16 population.  
17

18  
19 The majority of the OOP payments were incurred in-hospital and as a result of direct medical costs.  
20 Payment for the operation itself and medications, medical supplies, and investigations (including  
21 laboratory tests) were the biggest contribution to these costs. A small percentage of costs were  
22 categorised as unofficial, such as for "nursing care" and "tips", although these were given by a majority  
23 of people who received care. In addition, almost half of these were being paid through unofficial  
24 payment channels and made directly to staff. We do not know whether these payments were later  
25 transferred to the hospital bank, however, these informal routes are common and indicate poor  
26 financial governance which urgently needs to be addressed.  
27

28  
29 The majority of payments were met using savings, followed by raising money from family or borrowing  
30 money. In addition, a large number of participants lost wages during the sickness episode and a  
31 proportion lost their jobs. In a country where informal work predominates and earnings can be  
32 unpredictable, this may impact on household financial security and influence future health seeking  
33 behaviour, both of the individuals affected and their immediate family and communities.  
34

35  
36 The majority of patients accessing surgical care were young males; whether this male predominance  
37 is a true reflection of surgical disease burden, beyond obstetrics and gynaecological care, in Sierra  
38 Leone or reveals a hidden gender bias in care seeking behaviour is beyond the remit of this study.  
39 Nevertheless, males who sought care in our study are traditionally the main breadwinners and the  
40 most economically active population group in Sierra Leone. This loss of wages and livelihood could  
41 have implications on the wider socio-economic determinants of health and the well-being of the  
42 household. The additional burden to the patients and their households as a result of the indirect costs  
43 supports the macroeconomic argument for investing in surgical care put forward by Grimes et al, who  
44 demonstrated the opportunity to avert 36,487 DALYs by investing in surgical care at hospital level in  
45 Sierra Leone.<sup>23,24</sup>  
46

47  
48 Some specialties, such as general surgery and urology incurred much higher overall costs for the  
49 surgical episode and this may be because operative intervention (with blood transfusion and a longer  
50 length of stay) is usually required. This contrasts for example, to trauma care that was often managed  
51 non-operatively. Such non-operative treatment for trauma may be partly as a result of local surgical  
52 practice, often driven by lack of resources such as the unavailability of internal fixation wires and  
53 orthopaedic implants, and partly because some common orthopaedic problems are managed non-  
54 operatively. In addition, we found that age and length of hospital stay were associated with  
55 significantly higher costs. This may be due to the fact that those under the age of 5 years were eligible  
56 for free health care in Sierra Leone and that a longer stay in hospital was associated with higher direct  
57 non-medical and indirect costs such as payment for food and lost wages.  
58  
59  
60

1  
2  
3 There are a limited number of studies to draw a direct comparison with as only a few used a similar  
4 methodology (direct interview) as opposed to modelled data or the use of caesarean section costs as  
5 a proxy measure to extrapolate costs, CE and impoverishment.<sup>2,16,25-30</sup> There are even fewer studies  
6 that report on the financial implications of all or most types of surgical care. The majority report on  
7 single surgical subspecialties such as obstetric care, paediatric surgery or trauma care. Nevertheless,  
8 there have been three recent studies from Uganda reporting CE rates of 31% and 55% and IE of  
9 47%.<sup>16,31,32</sup> A study in Malawi interviewing patients undergoing hernia operations reported CE rates as  
10 high as 90% using a threshold of 10% of yearly income.<sup>28</sup> Various studies looking at injury and trauma  
11 care costs in Vietnam, India and Nigeria have reported CE rates of 60%, 30% and 86% respectively<sup>25</sup>  
12 and a study in Morocco looking at obstetric surgical care alone estimated CE rates of 88%<sup>33</sup> while an  
13 emergency obstetric care study in Indonesia estimated CE at 68%.<sup>34</sup> The inter-country variability  
14 makes it difficult to draw comparative conclusions. This highlights the need for a standardised way of  
15 assessing and measuring the financial implications of surgical care, to allow accurate collection and  
16 reporting of these global surgery metrics on financial risk protection.  
17  
18

19  
20 In keeping with other studies, we noted lower rates of CE and IE in comparison to the modelled and  
21 extrapolated estimates for Sierra Leone. This is probably because the modelled studies are based on  
22 the whole population that may require surgery and not on those that have successfully accessed  
23 surgical care. The lower rates of IE and CE seen may therefore be explained by a lack of access by the  
24 poorest. This is supported by data from Sierra Leone that estimates that up to 25% of deaths in 2011  
25 could have been averted through access to safe, timely and affordable surgical care and that Sierra  
26 Leone has an unmet surgical burden of disease of 92%<sup>10</sup>, with approximately 70% of Sierra Leoneans  
27 stating that the financial burden of OOP payments for healthcare was the biggest barrier to accessing  
28 care.<sup>35,36</sup> In addition, we found that those accessing tertiary level surgical care came from  
29 predominantly urban areas of Sierra Leone and when compared to the wider Sierra Leone population,  
30 had significantly higher asset ownership. It may be therefore that the poorest and those at the highest  
31 risk of financial catastrophe are not accessing care when needed. This may also reflect other known  
32 barriers to seeking surgical care in LMICs that are often complex and multifactorial such as cultural  
33 beliefs, attitudes and fears towards surgical care and structural barriers such as geographical access,  
34 transport links and referral systems.<sup>37</sup>  
35  
36  
37

### 38 **Limitations**

39 There are several limitations to this study. Firstly, it was dependant on recall and self-reported  
40 estimates of OOP costs and household expenditure. Although the questionnaire and methodology are  
41 a well-established way of obtaining this information in a low-resource setting where informal work  
42 predominates and payments are not often receipted. To increase accuracy of data collected,  
43 household expenditure questions were broken down to weekly, monthly and yearly costs, a  
44 chronological approach was used to the OOP cost questions that helped map out the patients journey  
45 for them, participants were encouraged to bring an appropriate family member to the interview, and  
46 in-country consensus gained and the questionnaire piloted prior to use.  
47  
48

49 Secondly, given that patients were often interviewed on the wards and potentially within hearing  
50 range of nurses, data on informal payment methods and informal costs, may not have been fully  
51 reported. If this were the case, we would have expected to see more missing data for payments made  
52 directly to staff in comparison to those made to the banks, however we did not observe this. This  
53 suggests that participants did not appear to be deterred from sharing this information.  
54  
55

56 Thirdly, the study only measures costs incurred during the illness episode up until discharge. We have  
57 therefore likely substantially underestimated the total costs of seeking surgical care.  
58  
59  
60

1  
2  
3 In addition, in Sierra Leone tertiary level obstetric care is provided at a different hospital and offered  
4 free of charge. Therefore, costs of accessing this were not included in this study. Further work needs  
5 to be done to see if those receiving free maternal healthcare incur any OOP costs and if informal  
6 payments such as tips paid to staff are as prevalent in the obstetric care hospital.  
7

8  
9 Finally, the desired sample size was not achieved as not all surgical patients admitted were  
10 interviewed. This was mostly due to many being discharged out of hours, at the weekend or after a  
11 short admission on the acute trauma ward, before the study team could consent or interview them.  
12 This may indicate that these patient had minor pathology, a shorter stay and lower OOP costs.  
13 Inclusion of these cases may have lowered the mean OOP costs, CE and IE rates but would poorly  
14 represent the financial barriers and wider implications of accessing surgical care for those that may  
15 have absconded or self-discharged due the cost of care. Nevertheless, although sample size was not  
16 obtained, the 95% confidence interval for a catastrophic expenditure rate of 18% was 14-22% which  
17 gives the study an overall power of 90%.  
18

## 19 20 **Conclusion**

21 This is the first empirical study from Sierra Leone that quantifies the financial burden of accessing and  
22 receiving surgical care. It adds insight into the global and national Sierra Leone modelled estimates of  
23 the likelihood of catastrophic and impoverishing expenditure if surgery is required and joins the small  
24 but growing body of other empirical studies reporting on the OOP costs and wider financial  
25 implications of surgical care. In addition, it highlights the need to prioritise financial risk protection  
26 within healthcare and surgery if universal health coverage is to be achieved.  
27  
28  
29

## 30 31 **Figure Legends**

### 32 **Figure 1: Study Recruitment Process Diagram**

33  
34 Author Contribution: JD, AL, TBK and HW conceptualised the study. MP, JD, and AL developed the  
35 protocol and survey tools; MP, JD, and CG analysed the data; all authors contributed to the  
36 interpretation of the results and write up of the manuscript; All authors approved the manuscript for  
37 publication.  
38

39 Competing interests: None declared.  
40

41 Funding: This research was partly funded by the National Institute of Health Research (NIHR) Global  
42 Health Research Unit on Health System Strengthening in Sub-Saharan Africa, King's College London  
43 (GHRU 16/136/54) using UK aid from the UK Government to support global health research. The  
44 views expressed in this publication are those of the author(s) and not necessarily those of the NIHR  
45 or the Department of Health and Social Care.  
46  
47

48 Data Sharing: Further data is available on reasonable request from the corresponding author.  
49

50 Patient and Public Involvement / Cohort Description: The Lancet Commission on Global Surgery has  
51 shown that out of pocket expenditure limits patients ability to access surgical care when needed.  
52 Accessing care for a surgically treatable disease to reduce mortality or morbidity is a priority for  
53 patients. The methodology employed was standard for assessing out of pocket costs, wealth, and  
54 healthcare expenditure. Patients were not involved in designing these methods, however, they were  
55 involved in testing and refining them to ensure appropriateness to a local setting. No patients were  
56 involved in assisiting with the recruitment to and conduct of the study.  
57  
58  
59  
60

As part of the ethics board approval, we did not collect contact details of the patients involved in this study and hence cannot disseminate the results to them. However, the results are being shared widely amongst policy workers, community leaders, and clinicians in Sierra Leone. The patient advocacy movement in Sierra Leone, like in many low-income countries, is nascent, hence there are no patient groups with which to share results. We hope that our work will galvanise greater advocacy and enable sharing more widely.

Acknowledgements: We thank the healthcare workers and patients who were involved in refining the data collection tool to ensure its applicability to a local setting.

## References

1. Meara JG, Leather AJ, Hagander L, et al. Global Surgery 2030: evidence and solutions for achieving health, welfare, and economic development. *Lancet* 2015; **386**(9993): 569-624.
2. Shrimme MG, Dare AJ, Alkire BC, O'Neill K, Meara JG. Catastrophic expenditure to pay for surgery worldwide: a modelling study. *Lancet Glob Health* 2015; **3 Suppl 2**: S38-44.
3. Shrimme MG, Bickler SW, Alkire BC, Mock C. Global burden of surgical disease: an estimation from the provider perspective. *Lancet Glob Health* 2015; **3 Suppl 2**: S8-9.
4. World Bank Development Indicators 2016. <http://data.worldbank.org/data-catalog/world-development-indicators> (accessed 10th August 2018).
5. Shrimme MG, Dare A, Alkire BC, Meara JG. A global country-level comparison of the financial burden of surgery. *Br J Surg* 2016; **103**(11): 1453-61.
6. WHO. World Health Organisation: Health statistics and information systems. Global Reference List of 100 Core Health Indicators. . 2015. <http://www.who.int/healthinfo/indicators/2015/en/>
7. World Bank: Risk of catastrophic expenditure for surgical care. Sierra Leone <https://data.worldbank.org/indicator/SH.SGR.CRSK.ZS?locations=SL>.
8. Farmer PE, Kim JY. Surgery and global health: a view from beyond the OR. *World J Surg* 2008; **32**(4): 533-6.
9. Bolkan HA, Von Schreeb J, Samai MM, et al. Met and unmet needs for surgery in Sierra Leone: A comprehensive, retrospective, countrywide survey from all health care facilities performing operations in 2012. *Surgery* 2015; **157**(6): 992-1001.
10. Groen RS, Samai M, Stewart KA, et al. Untreated surgical conditions in Sierra Leone: a cluster randomised, cross-sectional, countrywide survey. *Lancet* 2012; **380**(9847): 1082-7.
11. Hsu J, Flores G, Evans D, Mills A, Hanson K. Measuring financial protection against catastrophic health expenditures: methodological challenges for global monitoring. *Int J Equity Health* 2018; **17**(1): 69.
12. Xu K, Evans DB, Carrin G, Aguilar-Rivera AM, Musgrove P, Evans T. Protecting households from catastrophic health spending. *Health Aff (Millwood)* 2007; **26**(4): 972-83.
13. Hoang HT, Pham TL, Vo TT, Nguyen PK, Doran CM, Hill PS. The costs of traumatic brain injury due to motorcycle accidents in Hanoi, Vietnam. *Cost Eff Resour Alloc* 2008; **6**: 17.
14. Nguyen H, Ivers R, Jan S, Martiniuk A, Pham C. Catastrophic household costs due to injury in Vietnam. *Injury* 2013; **44**(5): 684-90.
15. National Surgical, Obstetric and Anaesthesia Strategic Plan. Sierra Leone Ministry of Health and Sanitation.
16. Anderson GA, Ilcisin L, Kayima P, et al. Out-of-pocket payment for surgery in Uganda: The rate of impoverishing and catastrophic expenditure at a government hospital. *PLoS One* 2017; **12**(10): e0187293.
17. World Health Organisation. Health statistics and information systems. Data collection tools - World Health Survey. . <http://www.who.int/healthinfo/survey/en/> (accessed 19th April 2018).
18. (SAGE). WHOHsaisDct-WSOGaAH. <http://www.who.int/healthinfo/sage/en/>

19. Grimes CE, Billingsley ML, Dare AJ, et al. The demographics of patients affected by surgical disease in district hospitals in two sub-Saharan African countries: a retrospective descriptive analysis. *Springerplus* 2015; **4**: 750.
20. USCF. Sample Size Calculators for Designing Clinical Research <https://sample-size.net> (accessed 6th October 2020).
21. 2015 Population and House Census: Summary of Final Results. . [https://www.statistics.sl/images/StatisticsSL/Documents/final-results\\_-\\_2015\\_population\\_and\\_housing\\_census.pdf](https://www.statistics.sl/images/StatisticsSL/Documents/final-results_-_2015_population_and_housing_census.pdf). Accessed 21st August 2019. .
22. Economic and Financial Survey 2014. . [https://www.statistics.sl/images/StatisticsSL/Documents/Publications/2014/economic\\_and\\_financial\\_survey\\_2014\\_2.pdf](https://www.statistics.sl/images/StatisticsSL/Documents/Publications/2014/economic_and_financial_survey_2014_2.pdf) (accessed 20th June 2019)
23. Grimes CE, Quaife M, Kamara TB, Lavy CBD, Leather AJM, Bolkan HA. Macroeconomic costs of the unmet burden of surgical disease in Sierra Leone: a retrospective economic analysis. *BMJ Open* 2018; **8**(3): e017824.
24. Grimes CE, Law R, Dare A, et al. Cost-Effectiveness of Two Government District Hospitals in Sub-Saharan Africa. *World J Surg* 2017; **41**(9): 2187-92.
25. Nguyen H, Ivers R, Jan S, Pham C. Cost of surgery and catastrophic expenditure in people admitted to hospital for injuries: estimates from a cohort study in Vietnam. *Lancet* 2015; **385** Suppl 2: S50.
26. Prinja S, Bahuguna P, Gupta R, Sharma A, Rana SK, Kumar R. Coverage and Financial Risk Protection for Institutional Delivery: How Universal Is Provision of Maternal Health Care in India? *PLoS One* 2015; **10**(9): e0137315.
27. Honda A, Randaoharison PG, Matsui M. Affordability of emergency obstetric and neonatal care at public hospitals in Madagascar. *Reprod Health Matters* 2011; **19**(37): 10-20.
28. Bijlmakers L, Wientjes M, Mwapasa G, et al. Out-of-pocket payments and catastrophic household expenditure to access essential surgery in Malawi - A cross-sectional patient survey. *Ann Med Surg (Lond)* 2019; **43**: 85-90.
29. Banu T, Chowdhury TK, Aziz TT, et al. Cost Incurred by the Family for Surgery in Their Children: A Bangladesh Perspective. *World J Surg* 2018; **42**(12): 3841-8.
30. Urua U, Osungbade K, Obembe T, Adeniji F. A cost analysis of road traffic injuries in a tertiary hospital in south-west Nigeria. *Int J Inj Contr Saf Promot* 2017; **24**(4): 510-8.
31. MacKinnon N, St-Louis E, Yousef Y, Situma M, Poenaru D. Out-of-Pocket and Catastrophic Expenses Incurred by Seeking Pediatric and Adult Surgical Care at a Public, Tertiary Care Centre in Uganda. *World J Surg* 2018; **42**(11): 3520-7.
32. Yap A, Cheung M, Kakembo N, et al. From Procedure to Poverty: Out-of-Pocket and Catastrophic Expenditure for Pediatric Surgery in Uganda. *J Surg Res* 2018; **232**: 484-91.
33. Boukhalifa C, Abouchadi S, Cunden N, Witter S. The free delivery and caesarean policy in Morocco: how much do households still pay? *Trop Med Int Health* 2016; **21**(2): 245-52.
34. Quayyum Z, Nadjib M, Ensor T, Suchahya PK. Expenditure on obstetric care and the protective effect of insurance on the poor: lessons from two Indonesian districts. *Health Policy Plan* 2010; **25**(3): 237-47.
35. Ponsar F, Tayler-Smith K, Philips M, et al. No cash, no care: how user fees endanger health--lessons learnt regarding financial barriers to healthcare services in Burundi, Sierra Leone, Democratic Republic of Congo, Chad, Haiti and Mali. *Int Health* 2011; **3**(2): 91-100.
36. Xu K, Evans DB, Kawabata K, Zeramdini R, Klavus J, Murray CJ. Household catastrophic health expenditure: a multicountry analysis. *Lancet* 2003; **362**(9378): 111-7.
37. Grimes CE, Bowman KG, Dodgion CM, Lavy CB. Systematic review of barriers to surgical care in low-income and middle-income countries. *World J Surg* 2011; **35**(5): 941-50.

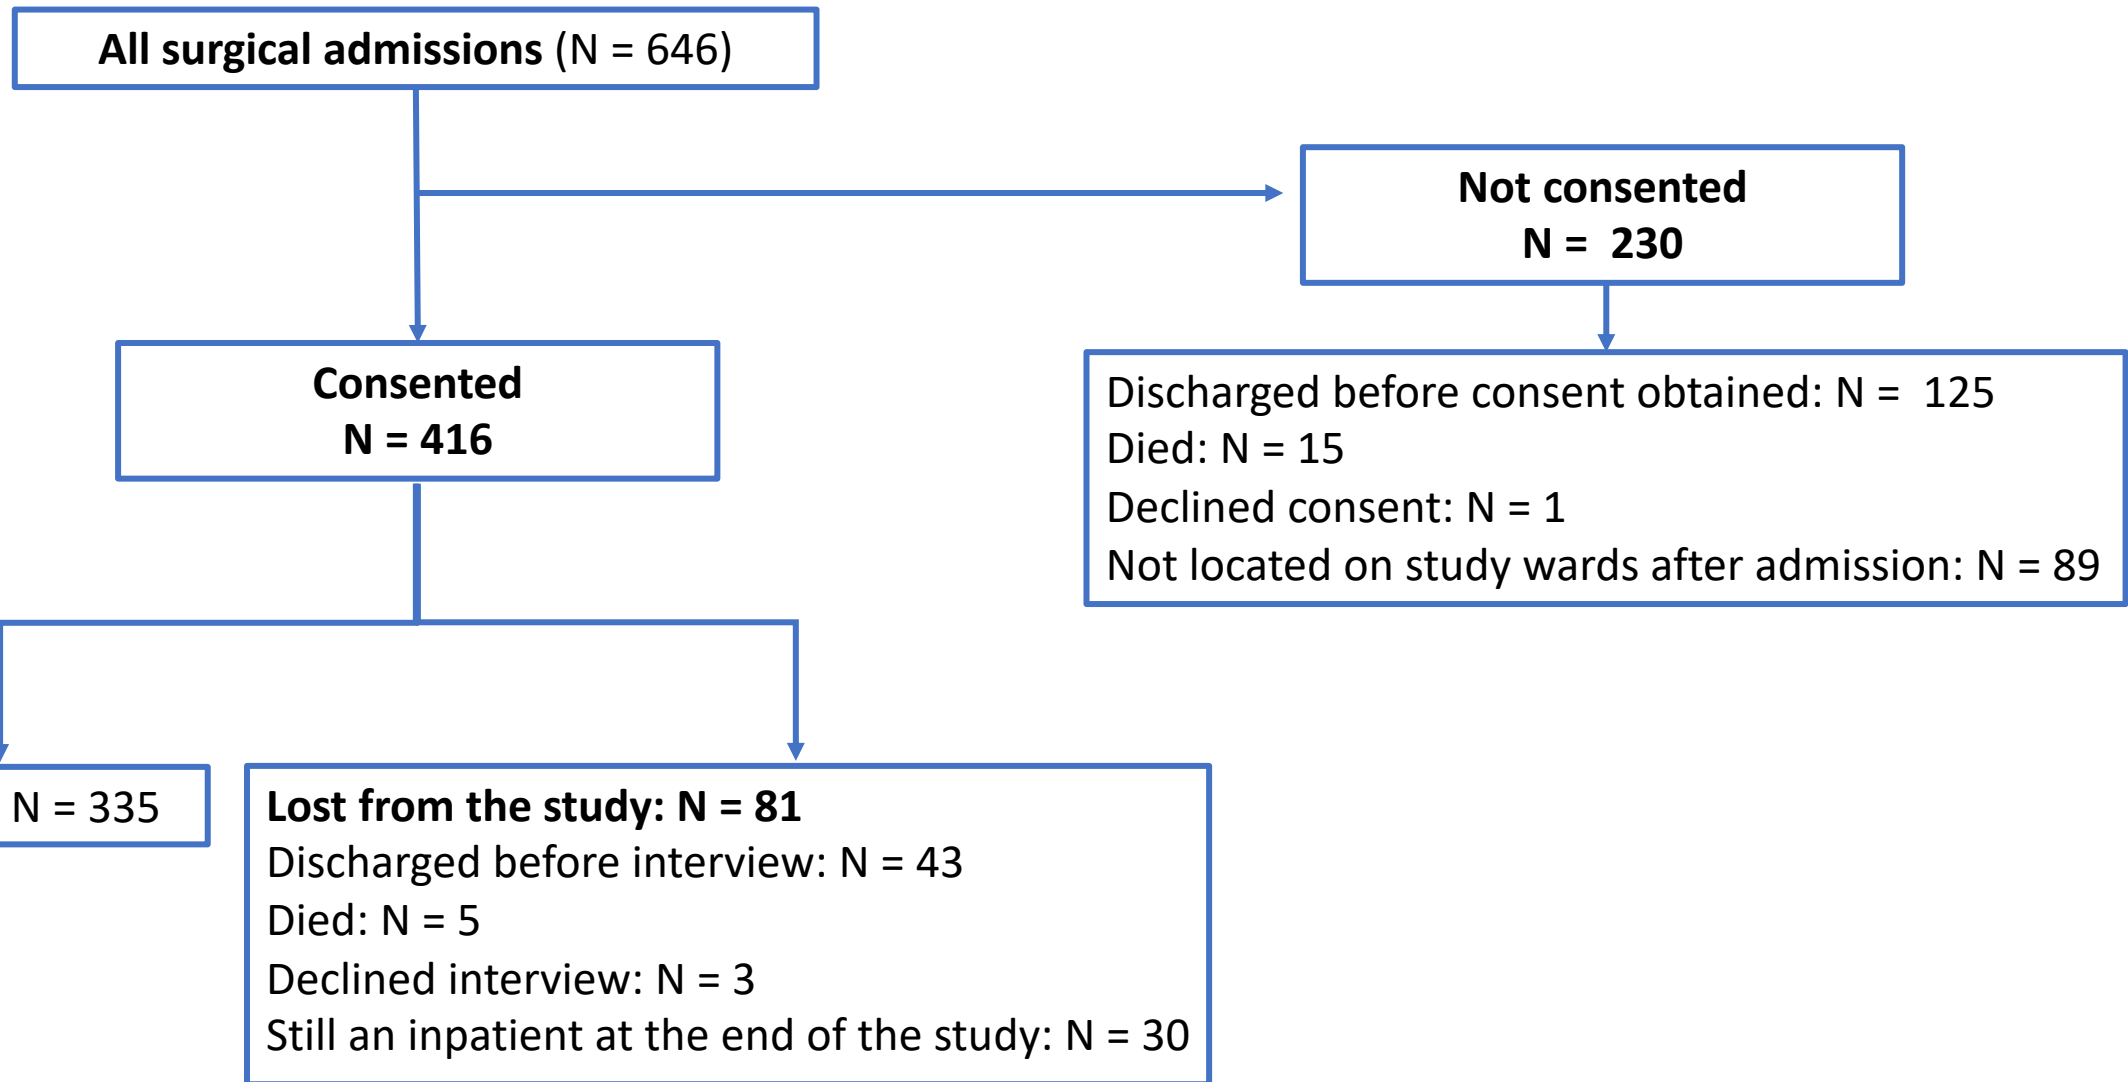

**Figure 1: Study recruitment process diagram**



## Appendix

### Additional information on recruitment and training of research assistants

Research Assistants (RAs) were recruited through a competitive process and trained to administer the questionnaire. Training for all RAs was standardised and formally ran over 2 days. This involved; a formal presentation introducing the study, a review of all study processes and associated documents, a role play interview between the RAs using the questionnaire, a walk through the hospital to ensure the RAs gained an insight in to the surgical patients' journey and points at which OOP payments may be made or cost incurred and a review of clinical notes, ward admission books and theatre log books to ensure that all demographic and diagnostic information was accurately captured.

### Appendix 1: Study questionnaire

#### Section 1: Demographics and admission questions

*These questions are to be answered in conjunction with the patients notes and screening/recruitment sheet*

| Code | Question                                                                                                                                                             | Response                                                                                                                                                                                                                                                                                                                                                      |
|------|----------------------------------------------------------------------------------------------------------------------------------------------------------------------|---------------------------------------------------------------------------------------------------------------------------------------------------------------------------------------------------------------------------------------------------------------------------------------------------------------------------------------------------------------|
| A1   | Participant <b>unique ID</b> :                                                                                                                                       |                                                                                                                                                                                                                                                                                                                                                               |
| A2   | <b>Discharge</b> details                                                                                                                                             | Care episode complete and discharged by Dr <input type="checkbox"/><br>Transfer to another healthcare facility <input type="checkbox"/><br>Self-discharging <input type="checkbox"/> If ticked state reason _____                                                                                                                                             |
| A3   | Where was the patient <b>admitted from</b> ?                                                                                                                         | Connaught<br>Direct to trauma ward / A&E / OPD <input type="checkbox"/><br>Referral <input type="checkbox"/> specify _____<br>SOP (specialist outpatients) <input type="checkbox"/><br>Through direct contact <input type="checkbox"/><br>Transfer from the medical ward <input type="checkbox"/><br>Other <input type="checkbox"/> specify _____             |
| A4   | Where is the patient being <b>discharged from</b> ?                                                                                                                  | Connaught<br>Trauma ward / A&E / OPD <input type="checkbox"/><br>Surgical ward <input type="checkbox"/><br>Annexe <input type="checkbox"/><br>Other <input type="checkbox"/> specify _____                                                                                                                                                                    |
| A5   | <b>Age</b> of patient                                                                                                                                                | _____ / Don't know <input type="checkbox"/> / Adult (AD) <input type="checkbox"/>                                                                                                                                                                                                                                                                             |
| A6   | <b>Sex</b>                                                                                                                                                           | Male <input type="checkbox"/> Female <input type="checkbox"/>                                                                                                                                                                                                                                                                                                 |
| A7   | Usual <b>residential location</b> (address including district and from that state if urban or rural)                                                                 | Address: _____<br>Urban <input type="checkbox"/> Rural <input type="checkbox"/>                                                                                                                                                                                                                                                                               |
| A8   | Does the patient meet any exemption criteria for <b>free treatment</b> ?                                                                                             | Yes <input type="checkbox"/> No <input type="checkbox"/><br>If yes, state which criteria (tick as applicable)<br>Aged under 5 years <input type="checkbox"/><br>Pregnant <input type="checkbox"/><br>Lactating <input type="checkbox"/><br>Ebola survivor <input type="checkbox"/><br>Destitute <input type="checkbox"/><br>Disabled <input type="checkbox"/> |
| A9   | <b>Type of admission</b>                                                                                                                                             | Emergency (e.g trauma ward) <input type="checkbox"/> Elective <input type="checkbox"/>                                                                                                                                                                                                                                                                        |
| A10  | <b>Primary diagnosis</b>                                                                                                                                             | _____                                                                                                                                                                                                                                                                                                                                                         |
| A11  | What <b>treatment</b> did the patient receive?<br><i>(Note: Procedures are often done in the Trauma ward (minors procedure room) e.g skin traction/POP/suturing)</i> | <b>Operation/ procedure</b> <input type="checkbox"/> (specify and go to A14)<br>Specify _____<br><b>Non-operative</b> surgical care <input type="checkbox"/> (go to A13)                                                                                                                                                                                      |
| A12  | If patient received <b>non-operative care</b> state reason                                                                                                           | Clinically appropriate / not recommended by Dr <input type="checkbox"/><br>Patient chose not to have an operation / procedure <input type="checkbox"/><br>Financial (unable to pay) <input type="checkbox"/><br>Other <input type="checkbox"/> (please give a brief statement)                                                                                |

|     |                                                               |                                                                     |
|-----|---------------------------------------------------------------|---------------------------------------------------------------------|
|     |                                                               |                                                                     |
| A13 | <b>Length of hospital stay</b> (admission and discharge date) | <b>Admission date:</b> __/__/____ <b>Discharge date:</b> __/__/____ |

**Section 2a: Household structure and typical household income and expenditure**

All questions are to be answered by the patient, parent, guardian or household member or head. **Encourage patient to invite household head / member / breadwinner or the person who deals with household expenditure and or has made the payments for the care received - to help answer the questions.**

**“Firstly are a few questions to understand the structure of your household (the people that eat food from the same pot and take instructions from the same head (excluding lodgers / individuals that pay to live in your house) and the average household income”**

| Code | Question                                                                                                                                                                                                                   | Response                                                                                                                                                                                                                                                                                                                                                                                                                                                                                                                                                                                                                                                                                                                                           |
|------|----------------------------------------------------------------------------------------------------------------------------------------------------------------------------------------------------------------------------|----------------------------------------------------------------------------------------------------------------------------------------------------------------------------------------------------------------------------------------------------------------------------------------------------------------------------------------------------------------------------------------------------------------------------------------------------------------------------------------------------------------------------------------------------------------------------------------------------------------------------------------------------------------------------------------------------------------------------------------------------|
| B1   | <b>Who</b> is being interviewed? Tick <u>all</u> that are applicable<br><br>If questions are being answered by someone other than the patient (e.g. household member), what is their relationship to the patient?          | Patient <input type="checkbox"/><br>Parent / Guardian <input type="checkbox"/><br>Household head <input type="checkbox"/><br>Other <input type="checkbox"/> (State relationship to patient)<br>_____                                                                                                                                                                                                                                                                                                                                                                                                                                                                                                                                               |
| B2   | What is the <b>size of your household</b> , including yourself how many people normally eat food from the same pot and take instructions from the same head (exclude lodgers / individuals that pay to live in your house) | _____                                                                                                                                                                                                                                                                                                                                                                                                                                                                                                                                                                                                                                                                                                                                              |
| B3   | Does <b>anyone in your household (household head/members) generate income?</b>                                                                                                                                             | Yes <input type="checkbox"/> (go to B4) No <input type="checkbox"/> (go to B7)                                                                                                                                                                                                                                                                                                                                                                                                                                                                                                                                                                                                                                                                     |
| B4   | <b>How many people</b> in your household <b>generate income</b> that is used to support the household?                                                                                                                     | _____ Don't know <input type="checkbox"/>                                                                                                                                                                                                                                                                                                                                                                                                                                                                                                                                                                                                                                                                                                          |
| B5   | What is the <b>occupation</b> of the person <b>who contributes the most</b> to your household expenses?                                                                                                                    | _____ Salaried <input type="checkbox"/> Non-salaried <input type="checkbox"/><br>Don't know <input type="checkbox"/>                                                                                                                                                                                                                                                                                                                                                                                                                                                                                                                                                                                                                               |
| B6   | <b>How much income does your household generate</b> (in total) to support the household in a typical month?                                                                                                                | _____ Leones Don't know <input type="checkbox"/>                                                                                                                                                                                                                                                                                                                                                                                                                                                                                                                                                                                                                                                                                                   |
| B7   | What is the <b>highest level of education of the main breadwinner (i.e the individual identified in B5)?</b>                                                                                                               | No formal education <input type="checkbox"/><br>Primary <input type="checkbox"/><br>Secondary <input type="checkbox"/><br>College <input type="checkbox"/><br>University <input type="checkbox"/><br>Other <input type="checkbox"/> specify _____                                                                                                                                                                                                                                                                                                                                                                                                                                                                                                  |
| B8   | Does your household <b>have any of the following?</b>                                                                                                                                                                      | Electricity / Light Yes <input type="checkbox"/> No <input type="checkbox"/><br>Mobile phone Yes <input type="checkbox"/> No <input type="checkbox"/><br>Radio Yes <input type="checkbox"/> No <input type="checkbox"/><br>Television (TV) Yes <input type="checkbox"/> No <input type="checkbox"/><br>Computer Yes <input type="checkbox"/> No <input type="checkbox"/><br>Refrigerator Yes <input type="checkbox"/> No <input type="checkbox"/><br>Generator Yes <input type="checkbox"/> No <input type="checkbox"/><br>Bicycle Yes <input type="checkbox"/> No <input type="checkbox"/><br>Honda/ Motorcycle Yes <input type="checkbox"/> No <input type="checkbox"/><br>Car or truck Yes <input type="checkbox"/> No <input type="checkbox"/> |
| B9   | What material is used for the <b>roof of your house?</b>                                                                                                                                                                   | Natural roofing (thatch) <input type="checkbox"/><br>Basic roofing (tarpoline, metal, zinc) <input type="checkbox"/><br>Finished roof (concrete / tiled) <input type="checkbox"/><br>Other <input type="checkbox"/> specify _____                                                                                                                                                                                                                                                                                                                                                                                                                                                                                                                  |
| B10  | What material is used for the <b>floor of your house?</b>                                                                                                                                                                  | Natural floor (mud/earth/wattle) <input type="checkbox"/><br>Basic floor (wood/cement) <input type="checkbox"/><br>Finished floor (concrete/tile/carpet) <input type="checkbox"/><br>Other <input type="checkbox"/> specify _____                                                                                                                                                                                                                                                                                                                                                                                                                                                                                                                  |
| B11  | What material is used for the <b>walls of your house?</b>                                                                                                                                                                  | Natural walls (mud/earth/wattle) <input type="checkbox"/><br>Basic walls (stone/mud bricks/zinc) <input type="checkbox"/><br>Finished walls (concrete) <input type="checkbox"/><br>Other <input type="checkbox"/> specify _____                                                                                                                                                                                                                                                                                                                                                                                                                                                                                                                    |

**Section 2b: Typical household expenditure**

**“I would now like to ask you some questions about your household expenses starting with how much your household spends on food and consumption in a typical week”**

| Code                                                                                                                                                                                                                                                      | Question                                                                                                                                                                                                                                                           | Response                                                                                                                                                                           |
|-----------------------------------------------------------------------------------------------------------------------------------------------------------------------------------------------------------------------------------------------------------|--------------------------------------------------------------------------------------------------------------------------------------------------------------------------------------------------------------------------------------------------------------------|------------------------------------------------------------------------------------------------------------------------------------------------------------------------------------|
| C1                                                                                                                                                                                                                                                        | Does the month of <b>Ramadhan</b> effect your household spending/expenses?                                                                                                                                                                                         | Yes <input type="checkbox"/> No <input type="checkbox"/><br><b>If yes, say: please answer all the questions on expenses based on a week / month outside of the Ramadhan period</b> |
| C2                                                                                                                                                                                                                                                        | How much does your household spend on <b>food (including chop money)</b> ?                                                                                                                                                                                         | _____ Leones Don't know <input type="checkbox"/>                                                                                                                                   |
| C3                                                                                                                                                                                                                                                        | How much does your household spend <b>drinks</b> (non-alcoholic drinks such as water, tea, coffee, milk and soft drinks)?                                                                                                                                          | _____ Leones Don't know <input type="checkbox"/>                                                                                                                                   |
| C4                                                                                                                                                                                                                                                        | <b>Tobacco and alcoholic beverages</b> (including beer, wine, spirits, poyo) – had at home / outside                                                                                                                                                               | _____ Leones Don't know <input type="checkbox"/>                                                                                                                                   |
| C5                                                                                                                                                                                                                                                        | Food eaten outside the dwelling (for example, at vendors, <b>cooking</b> , kiosks or restaurants)                                                                                                                                                                  | _____ Leones Don't know <input type="checkbox"/>                                                                                                                                   |
| C6                                                                                                                                                                                                                                                        | <b>Other food</b> items (e.g kola nut, food not included in chop money)                                                                                                                                                                                            | _____ Leones Don't know <input type="checkbox"/>                                                                                                                                   |
| C7                                                                                                                                                                                                                                                        | Communication fees, including megabites (internet), mobile phone ( <b>credit /top up</b> ) and others?                                                                                                                                                             | _____ Leones Don't know <input type="checkbox"/>                                                                                                                                   |
| C8                                                                                                                                                                                                                                                        | <b>Transportation</b> (to work place, market, school etc)? (For example, petrol, taxis, motorbike taxis)                                                                                                                                                           | _____ Leones Don't know <input type="checkbox"/>                                                                                                                                   |
| <b>"I would now like to ask you about other expenses your household might have had in the last month or a typical month"</b>                                                                                                                              |                                                                                                                                                                                                                                                                    |                                                                                                                                                                                    |
| C9                                                                                                                                                                                                                                                        | <b>Utilities, such as water, light, electricity (NPA), waste disposal, etc.?</b>                                                                                                                                                                                   | _____ Leones Don't know <input type="checkbox"/>                                                                                                                                   |
| C10                                                                                                                                                                                                                                                       | <b>Fuel (e.g cooking / generator</b> - gas, coal, kerosene, firewood, petrol, diesel, etc.)?                                                                                                                                                                       | _____ Leones Don't know <input type="checkbox"/>                                                                                                                                   |
| C11                                                                                                                                                                                                                                                       | <b>Personal toiletries</b> and personal care (e.g.soap, toothpaste, toothbrush, toilet roll, cosmetics, beauty salon, getting hair done etc.)?                                                                                                                     | _____ Leones Don't know <input type="checkbox"/>                                                                                                                                   |
| C12                                                                                                                                                                                                                                                       | <b>Clothing</b> and bedding?                                                                                                                                                                                                                                       | _____ Leones Don't know <input type="checkbox"/>                                                                                                                                   |
| C13                                                                                                                                                                                                                                                       | <b>Loan repayments</b> (e.g on your house) / other <b>debt</b> or <b>microcredit</b> for business or other purposes?                                                                                                                                               | _____ Leones Don't know <input type="checkbox"/>                                                                                                                                   |
| C14                                                                                                                                                                                                                                                       | <b>Entertainment</b> , including; cinemas/video centres to watch football matches, games, stadium for shows, soccer matches, or hangouts / chilling?                                                                                                               | _____ Leones Don't know <input type="checkbox"/>                                                                                                                                   |
| C15                                                                                                                                                                                                                                                       | Payments for <b>household help/servants</b> , including cook, maid, driver, security, gardener, etc.?                                                                                                                                                              | _____ Leones Don't know <input type="checkbox"/>                                                                                                                                   |
| C16                                                                                                                                                                                                                                                       | How much does your household pay in <b>remittance</b> to family living away from home ( <b>money, airtel/Africell money, food</b> etc)?                                                                                                                            | _____ Leones Don't know <input type="checkbox"/>                                                                                                                                   |
| C17                                                                                                                                                                                                                                                       | Excluding this hospital stay, how much money does your household usually spend on health care related to <b>"white man medicine"</b> , including medicines, fees for doctors' appointments and hospital visits?                                                    | _____ Leones Don't know <input type="checkbox"/>                                                                                                                                   |
| C18                                                                                                                                                                                                                                                       | Excluding this hospital stay, how much money does your household usually spend on health care related to <b>"country/black man medicine"</b> ?                                                                                                                     | _____ Leones Don't know <input type="checkbox"/>                                                                                                                                   |
| C19                                                                                                                                                                                                                                                       | Do you have any <b>other monthly expenditures</b> ?                                                                                                                                                                                                                | Yes <input type="checkbox"/> Specify _____<br>No <input type="checkbox"/> (go to C21)                                                                                              |
| C20                                                                                                                                                                                                                                                       | <b>How much do these other expenditures</b> amount to?                                                                                                                                                                                                             | _____ Leones Don't know <input type="checkbox"/>                                                                                                                                   |
| "I know these questions may be difficult to answer but try to give me the best estimate of expenses. I would now like you to focus on household expenses <b>over the last 12 months</b> . These are expenses that may be more periodic or "big purchases" |                                                                                                                                                                                                                                                                    |                                                                                                                                                                                    |
| C21                                                                                                                                                                                                                                                       | <b>Rent</b> (per year)                                                                                                                                                                                                                                             | _____ Leones Don't know <input type="checkbox"/>                                                                                                                                   |
| C22                                                                                                                                                                                                                                                       | <b>Education fees and school supplies</b> (tuition, course fees, books)?                                                                                                                                                                                           | _____ Leones Don't know <input type="checkbox"/>                                                                                                                                   |
| C23                                                                                                                                                                                                                                                       | <b>Electrical goods</b> (mobile phones, televisions, DVD, radio, refrigerators,)?                                                                                                                                                                                  | _____ Leones Don't know <input type="checkbox"/>                                                                                                                                   |
| C24                                                                                                                                                                                                                                                       | <b>Big purchases</b> such as;<br><b>Furniture</b> (tables, chairs, beds, sleeping mats)<br><b>Vehicles</b> (trucks, cars, motorcycles, keke, bicycles) and <b>upkeep/repairs</b> ?<br><b>Tools</b> (brooms, nails, hammer, paint, shovel, gardening equipment etc) | _____ Leones Don't know <input type="checkbox"/><br>_____ Leones Don't know <input type="checkbox"/><br>_____ Leones Don't know <input type="checkbox"/>                           |
| C25                                                                                                                                                                                                                                                       | <b>Hosting rituals or ceremonies</b> (funerals, birthdays, wedding, naming ceremony, pray de close, Christmas, the Haj)?                                                                                                                                           | _____ Leones Don't know <input type="checkbox"/>                                                                                                                                   |
| C26                                                                                                                                                                                                                                                       | <b>Gifts for ceremonies</b> (funerals, birthdays, wedding, naming ceremony, pray de close, Christmas) if invited?                                                                                                                                                  | _____ Leones Don't know <input type="checkbox"/>                                                                                                                                   |
| C27                                                                                                                                                                                                                                                       | <b>Donations or contributions</b> to religious organisations (e.g. church/mosque)                                                                                                                                                                                  | _____ Leones Don't know <input type="checkbox"/>                                                                                                                                   |
| C28                                                                                                                                                                                                                                                       | <b>Deposit / upfront payments for property or land</b> (excluding monthly loans)?                                                                                                                                                                                  | _____ Leones Don't know <input type="checkbox"/>                                                                                                                                   |
| C29                                                                                                                                                                                                                                                       | Cleaning services or repair service ( <b>house maintenance</b> )?                                                                                                                                                                                                  | _____ Leones Don't know <input type="checkbox"/>                                                                                                                                   |
| C30                                                                                                                                                                                                                                                       | <b>Livestock</b> (chicken, goat, sheep etc)?                                                                                                                                                                                                                       | _____ Leones Don't know <input type="checkbox"/>                                                                                                                                   |

|     |                                                                                                                     |                                                  |
|-----|---------------------------------------------------------------------------------------------------------------------|--------------------------------------------------|
| C31 | Taxes (city rate for home owner, vehicle tax, city council tax, NASSIT (national social security insurance trust)?) | _____ Leones Don't know <input type="checkbox"/> |
| C32 | Health insurance premiums (including, community health insurance schemes) or pre-paid health plans?                 | _____ Leones Don't know <input type="checkbox"/> |

**Section 3: Out-of-pocket payments for care sought prior to admission (from the day they fell ill with this illness)**  
**"I would now like to ask you about all the health costs to your household before coming to hospital from when you fell sick with this illness / problem"**

| Code                                                                                                                                                                                                                                                                                                                                                                                                                                                                                                                                                                                                                                                                                                                                                                                                                                                                                                                                                                                                                                                                                                                                                                                                                                                                                                                                                                                                                                                                                                                                                                                                                                                                                                                                                                                                                                                                                                                                                                                                                                                                                                                                                                                                                                                                                                                                                                                                                                                                                                                                                                                                                                                                                                                                                                                                                                                                                                                                                                                                                                                                                                                                                                                                                                                                                                                                                                                                                                                                                                                                                                                                                                                                                                                                                                                                                                                                                                                                                                                                                                                                                                                                                                                                                                                                                                                                                                                                                                                                                                                                                                                                                                                                                                                                                                                                                                                                                                                                                                                                                                                                                                                                                                                                                                                                    | Question                                                                                                                                                                                                                                                                                                                                                                                                                                                                                                                                                                                                                                                                                                                                                                                                                                                                                                                                                                                                                                                                                                                                                                                                                                                                                                                                                                                                                                                                                                                                                                                                                                                                                                                                                                                                   | Response                                                                                                                                                   |                                                                                                                                                                                                                                                                                                                                                                                                                                                                                                                                                                                                                                                                                                                                                                                                                                                                                                                                                                                                                                                                                                                                                                                                                                                                                                                                                                                                                                                                                                                                                                                                                                                                                                                                                                                                                                                                                             |                                                                                                                                                                                                                                                                                                                                                                                                                                                                                                                                                                                                                                                                                                                                                                                                                                                                                                                                                                                                                                                                                                                                                                                                                                                                                                                                                                                                                                                                                                                                                                                                                                                                                                                                                                                                            |
|-------------------------------------------------------------------------------------------------------------------------------------------------------------------------------------------------------------------------------------------------------------------------------------------------------------------------------------------------------------------------------------------------------------------------------------------------------------------------------------------------------------------------------------------------------------------------------------------------------------------------------------------------------------------------------------------------------------------------------------------------------------------------------------------------------------------------------------------------------------------------------------------------------------------------------------------------------------------------------------------------------------------------------------------------------------------------------------------------------------------------------------------------------------------------------------------------------------------------------------------------------------------------------------------------------------------------------------------------------------------------------------------------------------------------------------------------------------------------------------------------------------------------------------------------------------------------------------------------------------------------------------------------------------------------------------------------------------------------------------------------------------------------------------------------------------------------------------------------------------------------------------------------------------------------------------------------------------------------------------------------------------------------------------------------------------------------------------------------------------------------------------------------------------------------------------------------------------------------------------------------------------------------------------------------------------------------------------------------------------------------------------------------------------------------------------------------------------------------------------------------------------------------------------------------------------------------------------------------------------------------------------------------------------------------------------------------------------------------------------------------------------------------------------------------------------------------------------------------------------------------------------------------------------------------------------------------------------------------------------------------------------------------------------------------------------------------------------------------------------------------------------------------------------------------------------------------------------------------------------------------------------------------------------------------------------------------------------------------------------------------------------------------------------------------------------------------------------------------------------------------------------------------------------------------------------------------------------------------------------------------------------------------------------------------------------------------------------------------------------------------------------------------------------------------------------------------------------------------------------------------------------------------------------------------------------------------------------------------------------------------------------------------------------------------------------------------------------------------------------------------------------------------------------------------------------------------------------------------------------------------------------------------------------------------------------------------------------------------------------------------------------------------------------------------------------------------------------------------------------------------------------------------------------------------------------------------------------------------------------------------------------------------------------------------------------------------------------------------------------------------------------------------------------------------------------------------------------------------------------------------------------------------------------------------------------------------------------------------------------------------------------------------------------------------------------------------------------------------------------------------------------------------------------------------------------------------------------------------------------------------------------------------|------------------------------------------------------------------------------------------------------------------------------------------------------------------------------------------------------------------------------------------------------------------------------------------------------------------------------------------------------------------------------------------------------------------------------------------------------------------------------------------------------------------------------------------------------------------------------------------------------------------------------------------------------------------------------------------------------------------------------------------------------------------------------------------------------------------------------------------------------------------------------------------------------------------------------------------------------------------------------------------------------------------------------------------------------------------------------------------------------------------------------------------------------------------------------------------------------------------------------------------------------------------------------------------------------------------------------------------------------------------------------------------------------------------------------------------------------------------------------------------------------------------------------------------------------------------------------------------------------------------------------------------------------------------------------------------------------------------------------------------------------------------------------------------------------------|------------------------------------------------------------------------------------------------------------------------------------------------------------|---------------------------------------------------------------------------------------------------------------------------------------------------------------------------------------------------------------------------------------------------------------------------------------------------------------------------------------------------------------------------------------------------------------------------------------------------------------------------------------------------------------------------------------------------------------------------------------------------------------------------------------------------------------------------------------------------------------------------------------------------------------------------------------------------------------------------------------------------------------------------------------------------------------------------------------------------------------------------------------------------------------------------------------------------------------------------------------------------------------------------------------------------------------------------------------------------------------------------------------------------------------------------------------------------------------------------------------------------------------------------------------------------------------------------------------------------------------------------------------------------------------------------------------------------------------------------------------------------------------------------------------------------------------------------------------------------------------------------------------------------------------------------------------------------------------------------------------------------------------------------------------------|------------------------------------------------------------------------------------------------------------------------------------------------------------------------------------------------------------------------------------------------------------------------------------------------------------------------------------------------------------------------------------------------------------------------------------------------------------------------------------------------------------------------------------------------------------------------------------------------------------------------------------------------------------------------------------------------------------------------------------------------------------------------------------------------------------------------------------------------------------------------------------------------------------------------------------------------------------------------------------------------------------------------------------------------------------------------------------------------------------------------------------------------------------------------------------------------------------------------------------------------------------------------------------------------------------------------------------------------------------------------------------------------------------------------------------------------------------------------------------------------------------------------------------------------------------------------------------------------------------------------------------------------------------------------------------------------------------------------------------------------------------------------------------------------------------|
| D1                                                                                                                                                                                                                                                                                                                                                                                                                                                                                                                                                                                                                                                                                                                                                                                                                                                                                                                                                                                                                                                                                                                                                                                                                                                                                                                                                                                                                                                                                                                                                                                                                                                                                                                                                                                                                                                                                                                                                                                                                                                                                                                                                                                                                                                                                                                                                                                                                                                                                                                                                                                                                                                                                                                                                                                                                                                                                                                                                                                                                                                                                                                                                                                                                                                                                                                                                                                                                                                                                                                                                                                                                                                                                                                                                                                                                                                                                                                                                                                                                                                                                                                                                                                                                                                                                                                                                                                                                                                                                                                                                                                                                                                                                                                                                                                                                                                                                                                                                                                                                                                                                                                                                                                                                                                                      | When did you fall sick with the illness that meant you had to be admitted to hospital?                                                                                                                                                                                                                                                                                                                                                                                                                                                                                                                                                                                                                                                                                                                                                                                                                                                                                                                                                                                                                                                                                                                                                                                                                                                                                                                                                                                                                                                                                                                                                                                                                                                                                                                     | _____ days before admission<br>_____ weeks before admission<br>_____ months before admission<br>Don't know <input type="checkbox"/> (go to section 3 (C1)) |                                                                                                                                                                                                                                                                                                                                                                                                                                                                                                                                                                                                                                                                                                                                                                                                                                                                                                                                                                                                                                                                                                                                                                                                                                                                                                                                                                                                                                                                                                                                                                                                                                                                                                                                                                                                                                                                                             |                                                                                                                                                                                                                                                                                                                                                                                                                                                                                                                                                                                                                                                                                                                                                                                                                                                                                                                                                                                                                                                                                                                                                                                                                                                                                                                                                                                                                                                                                                                                                                                                                                                                                                                                                                                                            |
| "I would now like you to think about that period of time; from falling sick to getting to the point of decision to come to Connaught / PCMH. The following questions will be related to that time. I know that it may be difficult to think that far back but please give the best estimate you can of the costs"                                                                                                                                                                                                                                                                                                                                                                                                                                                                                                                                                                                                                                                                                                                                                                                                                                                                                                                                                                                                                                                                                                                                                                                                                                                                                                                                                                                                                                                                                                                                                                                                                                                                                                                                                                                                                                                                                                                                                                                                                                                                                                                                                                                                                                                                                                                                                                                                                                                                                                                                                                                                                                                                                                                                                                                                                                                                                                                                                                                                                                                                                                                                                                                                                                                                                                                                                                                                                                                                                                                                                                                                                                                                                                                                                                                                                                                                                                                                                                                                                                                                                                                                                                                                                                                                                                                                                                                                                                                                                                                                                                                                                                                                                                                                                                                                                                                                                                                                                       |                                                                                                                                                                                                                                                                                                                                                                                                                                                                                                                                                                                                                                                                                                                                                                                                                                                                                                                                                                                                                                                                                                                                                                                                                                                                                                                                                                                                                                                                                                                                                                                                                                                                                                                                                                                                            |                                                                                                                                                            |                                                                                                                                                                                                                                                                                                                                                                                                                                                                                                                                                                                                                                                                                                                                                                                                                                                                                                                                                                                                                                                                                                                                                                                                                                                                                                                                                                                                                                                                                                                                                                                                                                                                                                                                                                                                                                                                                             |                                                                                                                                                                                                                                                                                                                                                                                                                                                                                                                                                                                                                                                                                                                                                                                                                                                                                                                                                                                                                                                                                                                                                                                                                                                                                                                                                                                                                                                                                                                                                                                                                                                                                                                                                                                                            |
| D2                                                                                                                                                                                                                                                                                                                                                                                                                                                                                                                                                                                                                                                                                                                                                                                                                                                                                                                                                                                                                                                                                                                                                                                                                                                                                                                                                                                                                                                                                                                                                                                                                                                                                                                                                                                                                                                                                                                                                                                                                                                                                                                                                                                                                                                                                                                                                                                                                                                                                                                                                                                                                                                                                                                                                                                                                                                                                                                                                                                                                                                                                                                                                                                                                                                                                                                                                                                                                                                                                                                                                                                                                                                                                                                                                                                                                                                                                                                                                                                                                                                                                                                                                                                                                                                                                                                                                                                                                                                                                                                                                                                                                                                                                                                                                                                                                                                                                                                                                                                                                                                                                                                                                                                                                                                                      | Did you seek care for this illness elsewhere before coming to this hospital?                                                                                                                                                                                                                                                                                                                                                                                                                                                                                                                                                                                                                                                                                                                                                                                                                                                                                                                                                                                                                                                                                                                                                                                                                                                                                                                                                                                                                                                                                                                                                                                                                                                                                                                               | Yes <input type="checkbox"/> (go to D3) No <input type="checkbox"/> (go to section 4 (E1))                                                                 |                                                                                                                                                                                                                                                                                                                                                                                                                                                                                                                                                                                                                                                                                                                                                                                                                                                                                                                                                                                                                                                                                                                                                                                                                                                                                                                                                                                                                                                                                                                                                                                                                                                                                                                                                                                                                                                                                             |                                                                                                                                                                                                                                                                                                                                                                                                                                                                                                                                                                                                                                                                                                                                                                                                                                                                                                                                                                                                                                                                                                                                                                                                                                                                                                                                                                                                                                                                                                                                                                                                                                                                                                                                                                                                            |
| D3                                                                                                                                                                                                                                                                                                                                                                                                                                                                                                                                                                                                                                                                                                                                                                                                                                                                                                                                                                                                                                                                                                                                                                                                                                                                                                                                                                                                                                                                                                                                                                                                                                                                                                                                                                                                                                                                                                                                                                                                                                                                                                                                                                                                                                                                                                                                                                                                                                                                                                                                                                                                                                                                                                                                                                                                                                                                                                                                                                                                                                                                                                                                                                                                                                                                                                                                                                                                                                                                                                                                                                                                                                                                                                                                                                                                                                                                                                                                                                                                                                                                                                                                                                                                                                                                                                                                                                                                                                                                                                                                                                                                                                                                                                                                                                                                                                                                                                                                                                                                                                                                                                                                                                                                                                                                      | Where did you go to get care for your illness before coming to this hospital? Tick <u>all</u> that are applicable                                                                                                                                                                                                                                                                                                                                                                                                                                                                                                                                                                                                                                                                                                                                                                                                                                                                                                                                                                                                                                                                                                                                                                                                                                                                                                                                                                                                                                                                                                                                                                                                                                                                                          |                                                                                                                                                            |                                                                                                                                                                                                                                                                                                                                                                                                                                                                                                                                                                                                                                                                                                                                                                                                                                                                                                                                                                                                                                                                                                                                                                                                                                                                                                                                                                                                                                                                                                                                                                                                                                                                                                                                                                                                                                                                                             |                                                                                                                                                                                                                                                                                                                                                                                                                                                                                                                                                                                                                                                                                                                                                                                                                                                                                                                                                                                                                                                                                                                                                                                                                                                                                                                                                                                                                                                                                                                                                                                                                                                                                                                                                                                                            |
| For each type of care provider ticked from the list below ask about the <b>number of visits</b> and a <b>cost break down</b> . If the patient cannot give a breakdown of costs ask for an <b>estimated total</b><br><b>Guidance notes;</b><br><b>Consultation - fees to the provider ("doctors' fees"), fees excluding investigations and tests</b><br><b>Medications</b><br><b>Medical supplies - Consumables, gloves, bandages, dressings etc</b><br><b>Investigations – Includes labs, scans, x-rays and other imaging</b><br><b>Transportation - transport for getting to and from the facilities, subsequent investigations/ getting treatments / medicines</b>                                                                                                                                                                                                                                                                                                                                                                                                                                                                                                                                                                                                                                                                                                                                                                                                                                                                                                                                                                                                                                                                                                                                                                                                                                                                                                                                                                                                                                                                                                                                                                                                                                                                                                                                                                                                                                                                                                                                                                                                                                                                                                                                                                                                                                                                                                                                                                                                                                                                                                                                                                                                                                                                                                                                                                                                                                                                                                                                                                                                                                                                                                                                                                                                                                                                                                                                                                                                                                                                                                                                                                                                                                                                                                                                                                                                                                                                                                                                                                                                                                                                                                                                                                                                                                                                                                                                                                                                                                                                                                                                                                                                    |                                                                                                                                                                                                                                                                                                                                                                                                                                                                                                                                                                                                                                                                                                                                                                                                                                                                                                                                                                                                                                                                                                                                                                                                                                                                                                                                                                                                                                                                                                                                                                                                                                                                                                                                                                                                            |                                                                                                                                                            |                                                                                                                                                                                                                                                                                                                                                                                                                                                                                                                                                                                                                                                                                                                                                                                                                                                                                                                                                                                                                                                                                                                                                                                                                                                                                                                                                                                                                                                                                                                                                                                                                                                                                                                                                                                                                                                                                             |                                                                                                                                                                                                                                                                                                                                                                                                                                                                                                                                                                                                                                                                                                                                                                                                                                                                                                                                                                                                                                                                                                                                                                                                                                                                                                                                                                                                                                                                                                                                                                                                                                                                                                                                                                                                            |
| <table border="0" style="width: 100%;"> <tr> <td style="width: 50%; vertical-align: top;"> <b>Private clinic</b> <input type="checkbox"/> no. of visits _____<br/>                             How much was spent on;<br/>                             Consultation _____ Leones Don't know <input type="checkbox"/><br/>                             Medications _____ Leones Don't know <input type="checkbox"/><br/>                             Medical supplies _____ Leones Don't know <input type="checkbox"/><br/>                             Investigations _____ Leones Don't know <input type="checkbox"/><br/>                             Transportation _____ Leones Don't know <input type="checkbox"/><br/>                             Other _____ Leones Don't know <input type="checkbox"/><br/> <b>OR Estimated total</b> _____ Leones Don't know <input type="checkbox"/><br/><br/> <b>Charity or religious clinic</b> <input type="checkbox"/> no. of visits _____<br/>                             How much was spent on;<br/>                             Consultation _____ Leones Don't know <input type="checkbox"/><br/>                             Medications _____ Leones Don't know <input type="checkbox"/><br/>                             Medical supplies _____ Leones Don't know <input type="checkbox"/><br/>                             Investigations _____ Leones Don't know <input type="checkbox"/><br/>                             Transportation _____ Leones Don't know <input type="checkbox"/><br/>                             Other _____ Leones Don't know <input type="checkbox"/><br/> <b>OR Estimated total</b> _____ Leones Don't know <input type="checkbox"/><br/><br/> <b>Pharmacy, drug peddler, pepper Dr.</b> <input type="checkbox"/> no. of visits _____<br/>                             How much was spent on;<br/>                             Consultation _____ Leones Don't know <input type="checkbox"/><br/>                             Medications _____ Leones Don't know <input type="checkbox"/><br/>                             Medical supplies _____ Leones Don't know <input type="checkbox"/><br/>                             Investigations _____ Leones Don't know <input type="checkbox"/><br/>                             Transportation _____ Leones Don't know <input type="checkbox"/><br/>                             Other _____ Leones Don't know <input type="checkbox"/><br/> <b>OR Estimated total</b> _____ Leones Don't know <input type="checkbox"/><br/><br/> <b>Traditional Healer / Herbalist</b> <input type="checkbox"/> no. of visits _____                         </td> <td style="width: 50%; vertical-align: top;"> <b>Other government hospital</b> <input type="checkbox"/> no. of visits _____<br/>                             How much was spent on;<br/>                             Consultation _____ Leones Don't know <input type="checkbox"/><br/>                             Medications _____ Leones Don't know <input type="checkbox"/><br/>                             Medical supplies _____ Leones Don't know <input type="checkbox"/><br/>                             Investigations _____ Leones Don't know <input type="checkbox"/><br/>                             Transportation _____ Leones Don't know <input type="checkbox"/><br/>                             Other _____ Leones Don't know <input type="checkbox"/><br/> <b>OR Estimated total</b> _____ Leones Don't know <input type="checkbox"/><br/><br/> <b>Private hospital</b> <input type="checkbox"/> no. of visits _____<br/>                             How much was spent on;<br/>                             Consultation _____ Leones Don't know <input type="checkbox"/><br/>                             Medications _____ Leones Don't know <input type="checkbox"/><br/>                             Medical supplies _____ Leones Don't know <input type="checkbox"/><br/>                             Investigations _____ Leones Don't know <input type="checkbox"/><br/>                             Transportation _____ Leones Don't know <input type="checkbox"/><br/>                             Other _____ Leones Don't know <input type="checkbox"/><br/> <b>OR Estimated total</b> _____ Leones Don't know <input type="checkbox"/><br/><br/> <b>Community health clinic (Cheifdom level)</b> <input type="checkbox"/><br/>                             no. of visits _____<br/>                             How much was spent on;<br/>                             Consultation _____ Leones Don't know <input type="checkbox"/><br/>                             Medications _____ Leones Don't know <input type="checkbox"/><br/>                             Medical supplies _____ Leones Don't know <input type="checkbox"/><br/>                             Investigations _____ Leones Don't know <input type="checkbox"/><br/>                             Transportation _____ Leones Don't know <input type="checkbox"/><br/>                             Other _____ Leones Don't know <input type="checkbox"/><br/> <b>OR Estimated total</b> _____ Leones Don't know <input type="checkbox"/> </td> </tr> </table> |                                                                                                                                                                                                                                                                                                                                                                                                                                                                                                                                                                                                                                                                                                                                                                                                                                                                                                                                                                                                                                                                                                                                                                                                                                                                                                                                                                                                                                                                                                                                                                                                                                                                                                                                                                                                            |                                                                                                                                                            | <b>Private clinic</b> <input type="checkbox"/> no. of visits _____<br>How much was spent on;<br>Consultation _____ Leones Don't know <input type="checkbox"/><br>Medications _____ Leones Don't know <input type="checkbox"/><br>Medical supplies _____ Leones Don't know <input type="checkbox"/><br>Investigations _____ Leones Don't know <input type="checkbox"/><br>Transportation _____ Leones Don't know <input type="checkbox"/><br>Other _____ Leones Don't know <input type="checkbox"/><br><b>OR Estimated total</b> _____ Leones Don't know <input type="checkbox"/><br><br><b>Charity or religious clinic</b> <input type="checkbox"/> no. of visits _____<br>How much was spent on;<br>Consultation _____ Leones Don't know <input type="checkbox"/><br>Medications _____ Leones Don't know <input type="checkbox"/><br>Medical supplies _____ Leones Don't know <input type="checkbox"/><br>Investigations _____ Leones Don't know <input type="checkbox"/><br>Transportation _____ Leones Don't know <input type="checkbox"/><br>Other _____ Leones Don't know <input type="checkbox"/><br><b>OR Estimated total</b> _____ Leones Don't know <input type="checkbox"/><br><br><b>Pharmacy, drug peddler, pepper Dr.</b> <input type="checkbox"/> no. of visits _____<br>How much was spent on;<br>Consultation _____ Leones Don't know <input type="checkbox"/><br>Medications _____ Leones Don't know <input type="checkbox"/><br>Medical supplies _____ Leones Don't know <input type="checkbox"/><br>Investigations _____ Leones Don't know <input type="checkbox"/><br>Transportation _____ Leones Don't know <input type="checkbox"/><br>Other _____ Leones Don't know <input type="checkbox"/><br><b>OR Estimated total</b> _____ Leones Don't know <input type="checkbox"/><br><br><b>Traditional Healer / Herbalist</b> <input type="checkbox"/> no. of visits _____ | <b>Other government hospital</b> <input type="checkbox"/> no. of visits _____<br>How much was spent on;<br>Consultation _____ Leones Don't know <input type="checkbox"/><br>Medications _____ Leones Don't know <input type="checkbox"/><br>Medical supplies _____ Leones Don't know <input type="checkbox"/><br>Investigations _____ Leones Don't know <input type="checkbox"/><br>Transportation _____ Leones Don't know <input type="checkbox"/><br>Other _____ Leones Don't know <input type="checkbox"/><br><b>OR Estimated total</b> _____ Leones Don't know <input type="checkbox"/><br><br><b>Private hospital</b> <input type="checkbox"/> no. of visits _____<br>How much was spent on;<br>Consultation _____ Leones Don't know <input type="checkbox"/><br>Medications _____ Leones Don't know <input type="checkbox"/><br>Medical supplies _____ Leones Don't know <input type="checkbox"/><br>Investigations _____ Leones Don't know <input type="checkbox"/><br>Transportation _____ Leones Don't know <input type="checkbox"/><br>Other _____ Leones Don't know <input type="checkbox"/><br><b>OR Estimated total</b> _____ Leones Don't know <input type="checkbox"/><br><br><b>Community health clinic (Cheifdom level)</b> <input type="checkbox"/><br>no. of visits _____<br>How much was spent on;<br>Consultation _____ Leones Don't know <input type="checkbox"/><br>Medications _____ Leones Don't know <input type="checkbox"/><br>Medical supplies _____ Leones Don't know <input type="checkbox"/><br>Investigations _____ Leones Don't know <input type="checkbox"/><br>Transportation _____ Leones Don't know <input type="checkbox"/><br>Other _____ Leones Don't know <input type="checkbox"/><br><b>OR Estimated total</b> _____ Leones Don't know <input type="checkbox"/> |
| <b>Private clinic</b> <input type="checkbox"/> no. of visits _____<br>How much was spent on;<br>Consultation _____ Leones Don't know <input type="checkbox"/><br>Medications _____ Leones Don't know <input type="checkbox"/><br>Medical supplies _____ Leones Don't know <input type="checkbox"/><br>Investigations _____ Leones Don't know <input type="checkbox"/><br>Transportation _____ Leones Don't know <input type="checkbox"/><br>Other _____ Leones Don't know <input type="checkbox"/><br><b>OR Estimated total</b> _____ Leones Don't know <input type="checkbox"/><br><br><b>Charity or religious clinic</b> <input type="checkbox"/> no. of visits _____<br>How much was spent on;<br>Consultation _____ Leones Don't know <input type="checkbox"/><br>Medications _____ Leones Don't know <input type="checkbox"/><br>Medical supplies _____ Leones Don't know <input type="checkbox"/><br>Investigations _____ Leones Don't know <input type="checkbox"/><br>Transportation _____ Leones Don't know <input type="checkbox"/><br>Other _____ Leones Don't know <input type="checkbox"/><br><b>OR Estimated total</b> _____ Leones Don't know <input type="checkbox"/><br><br><b>Pharmacy, drug peddler, pepper Dr.</b> <input type="checkbox"/> no. of visits _____<br>How much was spent on;<br>Consultation _____ Leones Don't know <input type="checkbox"/><br>Medications _____ Leones Don't know <input type="checkbox"/><br>Medical supplies _____ Leones Don't know <input type="checkbox"/><br>Investigations _____ Leones Don't know <input type="checkbox"/><br>Transportation _____ Leones Don't know <input type="checkbox"/><br>Other _____ Leones Don't know <input type="checkbox"/><br><b>OR Estimated total</b> _____ Leones Don't know <input type="checkbox"/><br><br><b>Traditional Healer / Herbalist</b> <input type="checkbox"/> no. of visits _____                                                                                                                                                                                                                                                                                                                                                                                                                                                                                                                                                                                                                                                                                                                                                                                                                                                                                                                                                                                                                                                                                                                                                                                                                                                                                                                                                                                                                                                                                                                                                                                                                                                                                                                                                                                                                                                                                                                                                                                                                                                                                                                                                                                                                                                                                                                                                                                                                                                                                                                                                                                                                                                                                                                                                                                                                                                                                                                                                                                                                                                                                                                                                                                                                                                                                                                                                                             | <b>Other government hospital</b> <input type="checkbox"/> no. of visits _____<br>How much was spent on;<br>Consultation _____ Leones Don't know <input type="checkbox"/><br>Medications _____ Leones Don't know <input type="checkbox"/><br>Medical supplies _____ Leones Don't know <input type="checkbox"/><br>Investigations _____ Leones Don't know <input type="checkbox"/><br>Transportation _____ Leones Don't know <input type="checkbox"/><br>Other _____ Leones Don't know <input type="checkbox"/><br><b>OR Estimated total</b> _____ Leones Don't know <input type="checkbox"/><br><br><b>Private hospital</b> <input type="checkbox"/> no. of visits _____<br>How much was spent on;<br>Consultation _____ Leones Don't know <input type="checkbox"/><br>Medications _____ Leones Don't know <input type="checkbox"/><br>Medical supplies _____ Leones Don't know <input type="checkbox"/><br>Investigations _____ Leones Don't know <input type="checkbox"/><br>Transportation _____ Leones Don't know <input type="checkbox"/><br>Other _____ Leones Don't know <input type="checkbox"/><br><b>OR Estimated total</b> _____ Leones Don't know <input type="checkbox"/><br><br><b>Community health clinic (Cheifdom level)</b> <input type="checkbox"/><br>no. of visits _____<br>How much was spent on;<br>Consultation _____ Leones Don't know <input type="checkbox"/><br>Medications _____ Leones Don't know <input type="checkbox"/><br>Medical supplies _____ Leones Don't know <input type="checkbox"/><br>Investigations _____ Leones Don't know <input type="checkbox"/><br>Transportation _____ Leones Don't know <input type="checkbox"/><br>Other _____ Leones Don't know <input type="checkbox"/><br><b>OR Estimated total</b> _____ Leones Don't know <input type="checkbox"/> |                                                                                                                                                            |                                                                                                                                                                                                                                                                                                                                                                                                                                                                                                                                                                                                                                                                                                                                                                                                                                                                                                                                                                                                                                                                                                                                                                                                                                                                                                                                                                                                                                                                                                                                                                                                                                                                                                                                                                                                                                                                                             |                                                                                                                                                                                                                                                                                                                                                                                                                                                                                                                                                                                                                                                                                                                                                                                                                                                                                                                                                                                                                                                                                                                                                                                                                                                                                                                                                                                                                                                                                                                                                                                                                                                                                                                                                                                                            |

|                                                                                                                                                                                                                                                                                                                                                                                                                                                                                                                                                                                                                                                                                                                                                                                                                                                                                                                                                                                                                                                                                                                                                                                                                                                                                                                                                                                                                                                                                                                                                                                                                                                                                                                                                                                                                                                  |                                                                                                                                                                                                                                                                                                                                                                                                                                                                                                                                                                                                                                                                                                                                                                                                                                                                                                                                                                                                                                                                                                                                                                                                                                                                                                                                                                                                                                                                                                                                                                                                                                                                                                                                                                                                                                                                                                      |
|--------------------------------------------------------------------------------------------------------------------------------------------------------------------------------------------------------------------------------------------------------------------------------------------------------------------------------------------------------------------------------------------------------------------------------------------------------------------------------------------------------------------------------------------------------------------------------------------------------------------------------------------------------------------------------------------------------------------------------------------------------------------------------------------------------------------------------------------------------------------------------------------------------------------------------------------------------------------------------------------------------------------------------------------------------------------------------------------------------------------------------------------------------------------------------------------------------------------------------------------------------------------------------------------------------------------------------------------------------------------------------------------------------------------------------------------------------------------------------------------------------------------------------------------------------------------------------------------------------------------------------------------------------------------------------------------------------------------------------------------------------------------------------------------------------------------------------------------------|------------------------------------------------------------------------------------------------------------------------------------------------------------------------------------------------------------------------------------------------------------------------------------------------------------------------------------------------------------------------------------------------------------------------------------------------------------------------------------------------------------------------------------------------------------------------------------------------------------------------------------------------------------------------------------------------------------------------------------------------------------------------------------------------------------------------------------------------------------------------------------------------------------------------------------------------------------------------------------------------------------------------------------------------------------------------------------------------------------------------------------------------------------------------------------------------------------------------------------------------------------------------------------------------------------------------------------------------------------------------------------------------------------------------------------------------------------------------------------------------------------------------------------------------------------------------------------------------------------------------------------------------------------------------------------------------------------------------------------------------------------------------------------------------------------------------------------------------------------------------------------------------------|
| <p>How much was spent on;</p> <p>Consultation _____ Leones Don't know <input type="checkbox"/></p> <p>Medications _____ Leones Don't know <input type="checkbox"/></p> <p>Medical supplies _____ Leones Don't know <input type="checkbox"/></p> <p>Investigations _____ Leones Don't know <input type="checkbox"/></p> <p>Transportation _____ Leones Don't know <input type="checkbox"/></p> <p>Other _____ Leones Don't know <input type="checkbox"/></p> <p><b>OR</b> Estimated total _____ Leones Don't know <input type="checkbox"/></p> <p><b>Traditional Birth Attendant (TBA) /Community Health Worker came home</b> <input type="checkbox"/> no. of visits ____</p> <p>How much was spent on;</p> <p>Consultation _____ Leones Don't know <input type="checkbox"/></p> <p>Medications _____ Leones Don't know <input type="checkbox"/></p> <p>Medical supplies _____ Leones Don't know <input type="checkbox"/></p> <p>Investigations _____ Leones Don't know <input type="checkbox"/></p> <p>Transportation _____ Leones Don't know <input type="checkbox"/></p> <p>Other _____ Leones Don't know <input type="checkbox"/></p> <p><b>OR</b> Estimated total _____ Leones Don't know <input type="checkbox"/></p> <p><b>Home delivery</b> <input type="checkbox"/> no. of visits ____</p> <p>How much was spent on;</p> <p>Consultation _____ Leones Don't know <input type="checkbox"/></p> <p>Medications _____ Leones Don't know <input type="checkbox"/></p> <p>Medical supplies _____ Leones Don't know <input type="checkbox"/></p> <p>Investigations _____ Leones Don't know <input type="checkbox"/></p> <p>Transportation _____ Leones Don't know <input type="checkbox"/></p> <p>Other _____ Leones Don't know <input type="checkbox"/></p> <p><b>OR</b> Estimated total _____ Leones Don't know <input type="checkbox"/></p> | <p><b>Community health post</b> <input type="checkbox"/> no. of visits ____</p> <p>How much was spent on;</p> <p>Consultation _____ Leones Don't know <input type="checkbox"/></p> <p>Medications _____ Leones Don't know <input type="checkbox"/></p> <p>Medical supplies _____ Leones Don't know <input type="checkbox"/></p> <p>Investigations _____ Leones Don't know <input type="checkbox"/></p> <p>Transportation _____ Leones Don't know <input type="checkbox"/></p> <p>Other _____ Leones Don't know <input type="checkbox"/></p> <p><b>OR</b> Estimated total _____ Leones Don't know <input type="checkbox"/></p> <p><b>Maternity Child Health Post (MCHP)</b> <input type="checkbox"/> no. of visits ____</p> <p>How much was spent on;</p> <p>Consultation _____ Leones Don't know <input type="checkbox"/></p> <p>Medications _____ Leones Don't know <input type="checkbox"/></p> <p>Medical supplies _____ Leones Don't know <input type="checkbox"/></p> <p>Investigations _____ Leones Don't know <input type="checkbox"/></p> <p>Transportation _____ Leones Don't know <input type="checkbox"/></p> <p>Other _____ Leones Don't know <input type="checkbox"/></p> <p><b>OR</b> Estimated total _____ Leones Don't know <input type="checkbox"/></p> <p><b>Other</b> <input type="checkbox"/> specify _____ no. of visits ____</p> <p>How much was spent on;</p> <p>Consultation _____ Leones Don't know <input type="checkbox"/></p> <p>Medications _____ Leones Don't know <input type="checkbox"/></p> <p>Medical supplies _____ Leones Don't know <input type="checkbox"/></p> <p>Investigations _____ Leones Don't know <input type="checkbox"/></p> <p>Transportation _____ Leones Don't know <input type="checkbox"/></p> <p>Other _____ Leones Don't know <input type="checkbox"/></p> <p><b>OR</b> Estimated total _____ Leones Don't know <input type="checkbox"/></p> |
|--------------------------------------------------------------------------------------------------------------------------------------------------------------------------------------------------------------------------------------------------------------------------------------------------------------------------------------------------------------------------------------------------------------------------------------------------------------------------------------------------------------------------------------------------------------------------------------------------------------------------------------------------------------------------------------------------------------------------------------------------------------------------------------------------------------------------------------------------------------------------------------------------------------------------------------------------------------------------------------------------------------------------------------------------------------------------------------------------------------------------------------------------------------------------------------------------------------------------------------------------------------------------------------------------------------------------------------------------------------------------------------------------------------------------------------------------------------------------------------------------------------------------------------------------------------------------------------------------------------------------------------------------------------------------------------------------------------------------------------------------------------------------------------------------------------------------------------------------|------------------------------------------------------------------------------------------------------------------------------------------------------------------------------------------------------------------------------------------------------------------------------------------------------------------------------------------------------------------------------------------------------------------------------------------------------------------------------------------------------------------------------------------------------------------------------------------------------------------------------------------------------------------------------------------------------------------------------------------------------------------------------------------------------------------------------------------------------------------------------------------------------------------------------------------------------------------------------------------------------------------------------------------------------------------------------------------------------------------------------------------------------------------------------------------------------------------------------------------------------------------------------------------------------------------------------------------------------------------------------------------------------------------------------------------------------------------------------------------------------------------------------------------------------------------------------------------------------------------------------------------------------------------------------------------------------------------------------------------------------------------------------------------------------------------------------------------------------------------------------------------------------|

#### Section 4: Out-of-pocket payments related to hospital admission

**"I would now like to ask you about all the costs to your household from travel to the hospital to admission, your whole hospital stay and treatment through to discharge"**

Please reiterate that as with all questions any questions related to informal payments / payments directly to staff are completely anonymous and no names are recorded or required. The purpose is to understand how much patients have to pay for all types of costs associated with their hospital admission so the following questions should be answered without undue concern.

*If the household did not incur any of the expenses listed please state 0 Leones (this applies throughout the questionnaire)*

| Code | Question                                                                                                                                                               | Response                                                                                                                                                                                                                                                                                      |
|------|------------------------------------------------------------------------------------------------------------------------------------------------------------------------|-----------------------------------------------------------------------------------------------------------------------------------------------------------------------------------------------------------------------------------------------------------------------------------------------|
| E1   | Once the referral or decision was made to come to Connaught/PCMH, <b>how did you and all the attendants come / travel?</b>                                             | Ambulance <input type="checkbox"/><br>Public transport - Taxi / KK /Okada <input type="checkbox"/><br>Private transport <input type="checkbox"/><br>Other <input type="checkbox"/> specify _____                                                                                              |
| E2   | How much did this <b>transport cost?</b>                                                                                                                               | _____ Leones Don't know <input type="checkbox"/>                                                                                                                                                                                                                                              |
| E3   | Did you have to pay any money for <b>registration?</b> If yes, ask how much the household paid for registration fees?<br><br>Tick <u>all</u> that are applicable       | _____ Leones Don't know <input type="checkbox"/><br>Who or where was that paid to;<br>- Bank in Connaught <input type="checkbox"/><br>_____ Leones<br>- Directly to hospital staff <input type="checkbox"/><br>_____ Leones<br>- Other <input type="checkbox"/> specify _____<br>_____ Leones |
| E4   | Did you have to pay any money for <b>admission</b> (fees / booklet)? If yes, ask how much the household paid for admission?<br><br>Tick <u>all</u> that are applicable | _____ Leones Don't know <input type="checkbox"/><br>Who or where was that paid to;<br>- Bank in Connaught <input type="checkbox"/><br>_____ Leones<br>- Directly to hospital staff <input type="checkbox"/><br>_____ Leones                                                                   |

|     |                                                                                                                                                                                                                                                                                                        |                                                                                                                                                                                                                                                                                                                                                                                                                                   |
|-----|--------------------------------------------------------------------------------------------------------------------------------------------------------------------------------------------------------------------------------------------------------------------------------------------------------|-----------------------------------------------------------------------------------------------------------------------------------------------------------------------------------------------------------------------------------------------------------------------------------------------------------------------------------------------------------------------------------------------------------------------------------|
|     |                                                                                                                                                                                                                                                                                                        | - Other <input type="checkbox"/> specify _____<br>_____ Leones                                                                                                                                                                                                                                                                                                                                                                    |
| E5  | Did you have to pay any money at or for <b>triage (e.g for blood sugar)</b> ? If yes, ask how much the household paid?<br><br>Tick <u>all</u> that are applicable                                                                                                                                      | _____ Leones Don't know <input type="checkbox"/><br>Who or where was that paid to;<br>- Bank in Connaught <input type="checkbox"/><br>_____ Leones<br>- Directly to hospital staff <input type="checkbox"/><br>_____ Leones<br>- Other <input type="checkbox"/> specify _____<br>_____ Leones                                                                                                                                     |
| E6  | Did you have to pay any money for any <b>helpers</b> (e.g porters, wheelchair, hospital staff to help you get around etc). If yes, ask how much the household paid?                                                                                                                                    | _____ Leones Don't know <input type="checkbox"/>                                                                                                                                                                                                                                                                                                                                                                                  |
| E7  | Did you have to pay any <b>doctors' fees / consultation fees</b> ? If yes, ask how much the household paid in doctors' fees / consultation fees?<br><br>Tick <u>all</u> that are applicable                                                                                                            | _____ Leones Don't know <input type="checkbox"/><br>Who or where was that paid to;<br>- Bank in Connaught <input type="checkbox"/><br>_____ Leones<br>- Directly to healthcare workers <input type="checkbox"/><br>_____ Leones<br>- Other <input type="checkbox"/> specify _____<br>_____ Leones                                                                                                                                 |
| E8  | Did you have any <b>laboratory (lab) tests</b> ? If yes, ask how much money the household spent on these tests?<br><br>Tick <u>all</u> that are applicable                                                                                                                                             | _____ Leones Don't know <input type="checkbox"/><br>Who or where was that paid to;<br>- Bank in Connaught <input type="checkbox"/><br>_____ Leones<br>- External lab <input type="checkbox"/><br>_____ Leones<br>- Internal lab <input type="checkbox"/><br>_____ Leones<br>- Directly to healthcare workers <input type="checkbox"/><br>_____ Leones<br>- Other <input type="checkbox"/> specify _____<br>_____ Leones           |
| E9  | Did you have any <b>x-rays, scans or imaging</b> ? If yes, ask how much money your household spent on scans, imaging and x-rays?<br><br>Tick <u>all</u> that are applicable                                                                                                                            | _____ Leones Don't know <input type="checkbox"/><br>Who or where was that paid to;<br>- Bank in Connaught <input type="checkbox"/><br>_____ Leones<br>- External facility <input type="checkbox"/><br>_____ Leones<br>- Internal facility <input type="checkbox"/><br>_____ Leones<br>- Directly to healthcare workers <input type="checkbox"/><br>_____ Leones<br>- Other <input type="checkbox"/> specify _____<br>_____ Leones |
| E10 | Did the patient have an <b>operation or procedure</b> (e.g skin traction/POP/suturing) in hospital?                                                                                                                                                                                                    | Yes <input type="checkbox"/> No <input type="checkbox"/> (go to E15)                                                                                                                                                                                                                                                                                                                                                              |
| E11 | How much did you pay for this <b>operation or procedure</b> ?<br><br>Tick <u>all</u> that are applicable                                                                                                                                                                                               | _____ Leones. Don't know <input type="checkbox"/><br>Who or where was that paid to;<br>- Bank in Connaught <input type="checkbox"/><br>_____ Leones<br>- Directly to healthcare workers <input type="checkbox"/><br>_____ Leones<br>- Other <input type="checkbox"/> specify _____<br>_____ Leones                                                                                                                                |
| E12 | Did you have to pay for <b>medications or medical supplies</b> (e.g. cannulas, IV lines, gauze, bandages, dressings, gloves, catheters and other consumables) <b>for theatre / your operation/procedure</b> ? If yes, how much money did your household spend on these medicines and medical supplies? | _____ Leones. Don't know <input type="checkbox"/><br>Who or where was that paid to;<br>- Bank in Connaught <input type="checkbox"/><br>_____ Leones<br>- External pharmacy <input type="checkbox"/><br>_____ Leones                                                                                                                                                                                                               |

|     |                                                                                                                                                                                                                                                                                                                               |                                                                                                                                                                                                                                                                                                                                                                                                                                                                                                                                                         |
|-----|-------------------------------------------------------------------------------------------------------------------------------------------------------------------------------------------------------------------------------------------------------------------------------------------------------------------------------|---------------------------------------------------------------------------------------------------------------------------------------------------------------------------------------------------------------------------------------------------------------------------------------------------------------------------------------------------------------------------------------------------------------------------------------------------------------------------------------------------------------------------------------------------------|
|     | Tick <u>all</u> that are applicable                                                                                                                                                                                                                                                                                           | <ul style="list-style-type: none"> <li>- Internal pharmacy / cost recovery <input type="checkbox"/><br/>_____ Leones</li> <li>- Directly to healthcare workers <input type="checkbox"/><br/>_____ Leones</li> <li>- Other <input type="checkbox"/> specify _____<br/>_____ Leones</li> </ul>                                                                                                                                                                                                                                                            |
| E13 | Did you have any <b>extra charges once in the operating room /area?</b><br>Please specify what this was for.                                                                                                                                                                                                                  | Yes <input type="checkbox"/> (specify) _____ No <input type="checkbox"/> (go to E15)<br><b>Specify what this was for?</b><br>_____                                                                                                                                                                                                                                                                                                                                                                                                                      |
| E14 | How much money did your household spend on these <b>extra-charges in the operating room?</b><br><br>Tick <u>all</u> that are applicable                                                                                                                                                                                       | _____ Leones. Don't know <input type="checkbox"/><br>Who or where was that paid to;<br><ul style="list-style-type: none"> <li>- Bank in Connaught <input type="checkbox"/><br/>_____ Leones</li> <li>- External pharmacy <input type="checkbox"/><br/>_____ Leones</li> <li>- Internal pharmacy / cost recovery <input type="checkbox"/><br/>_____ Leones</li> <li>- Directly to healthcare workers <input type="checkbox"/><br/>_____ Leones</li> <li>- Other <input type="checkbox"/> specify _____<br/>_____ Leones</li> </ul>                       |
| E15 | Did your household have to arrange and get <b>blood for transfusion?</b>                                                                                                                                                                                                                                                      | Yes <input type="checkbox"/> No <input type="checkbox"/> (go to E18)                                                                                                                                                                                                                                                                                                                                                                                                                                                                                    |
| E17 | How much money did your household spend on <b>blood transfusion related costs</b> (including blood bank fees, supplies, paying a donor etc.)<br><br>Tick <u>all</u> that are applicable                                                                                                                                       | _____ Leones Don't know <input type="checkbox"/><br>Who or where was that paid to;<br><ul style="list-style-type: none"> <li>- Bank in Connaught <input type="checkbox"/><br/>_____ Leones</li> <li>- External facility <input type="checkbox"/><br/>_____ Leones</li> <li>- Internal facility <input type="checkbox"/><br/>_____ Leones</li> <li>- Directly to healthcare workers <input type="checkbox"/><br/>_____ Leones</li> <li>- Other <input type="checkbox"/> specify _____<br/>_____ Leones</li> </ul>                                        |
| E18 | Did you have to pay for any <b>medications in A&amp;E/OPD or on the ward</b> (excluding prescriptions specifically for theatre)? If yes, ask how much the household paid for this?<br><br>Tick <u>all</u> that are applicable                                                                                                 | _____ Leones Don't know <input type="checkbox"/><br>Who or where was that paid to;<br><ul style="list-style-type: none"> <li>- Bank in Connaught <input type="checkbox"/><br/>_____ Leones</li> <li>- External pharmacy <input type="checkbox"/><br/>_____ Leones</li> <li>- Internal pharmacy / cost recovery <input type="checkbox"/><br/>_____ Leones</li> <li>- Directly to healthcare workers <input type="checkbox"/><br/>_____ Leones</li> <li>- Other <input type="checkbox"/> specify _____<br/>_____ Leones</li> </ul>                        |
| E19 | Did you have to pay for any <b>medical supplies in A&amp;E/OPD and the Ward</b> (not including medications, e.g. cannulas, IV lines, gauze, bandages, dressings, gloves, catheters and other consumables) (excluding the prescription for theatre)? If yes, ask how much was paid?<br><br>Tick <u>all</u> that are applicable | _____ Leones. Don't know <input type="checkbox"/><br>Who or where was that paid to;<br><ul style="list-style-type: none"> <li>- Bank in Connaught <input type="checkbox"/><br/>_____ Leones</li> <li>- External pharmacy / facility <input type="checkbox"/><br/>_____ Leones</li> <li>- Internal pharmacy / facility / cost recovery <input type="checkbox"/><br/>_____ Leones</li> <li>- Directly to healthcare workers <input type="checkbox"/><br/>_____ Leones</li> <li>- Other <input type="checkbox"/> specify _____<br/>_____ Leones</li> </ul> |
| E20 | Did you have to pay any <b>bed fees</b> (excluding admission fees / book? If yes, ask how much money the household paid in bed fees?                                                                                                                                                                                          | _____ Leones Don't know <input type="checkbox"/><br>Who or where was that paid to;<br><ul style="list-style-type: none"> <li>- Bank in Connaught <input type="checkbox"/></li> </ul>                                                                                                                                                                                                                                                                                                                                                                    |

|     |                                                                                                                                                                                                                                                                                               |                                                                                                                                                                                                                                                                                                                                                                                                                                                                        |
|-----|-----------------------------------------------------------------------------------------------------------------------------------------------------------------------------------------------------------------------------------------------------------------------------------------------|------------------------------------------------------------------------------------------------------------------------------------------------------------------------------------------------------------------------------------------------------------------------------------------------------------------------------------------------------------------------------------------------------------------------------------------------------------------------|
|     | Tick <u>all</u> that are applicable                                                                                                                                                                                                                                                           | <p>_____ Leones</p> <ul style="list-style-type: none"> <li>- Directly to healthcare workers <input type="checkbox"/></li> </ul> <p>_____ Leones</p> <ul style="list-style-type: none"> <li>- Other <input type="checkbox"/> specify _____</li> </ul> <p>_____ Leones</p>                                                                                                                                                                                               |
| E21 | Did your household pay any money for <b>nursing care (requested by nurses for care such as dressing changes etc, not including medications or medical supplies)?</b> If yes, ask how much was paid?                                                                                           | <p>_____ Leones Don't know <input type="checkbox"/></p> <p>Who or where was that paid to;</p> <ul style="list-style-type: none"> <li>- Bank in Connaught <input type="checkbox"/></li> </ul> <p>_____ Leones</p> <ul style="list-style-type: none"> <li>- Directly to healthcare workers <input type="checkbox"/></li> </ul> <p>_____ Leones</p> <ul style="list-style-type: none"> <li>- Other <input type="checkbox"/> specify _____</li> </ul> <p>_____ Leones</p>  |
| E22 | Did your household give any <b>tips (ahjo)</b> i.e. voluntary and not requested money / gifts to healthcare workers / staff? If yes ask how much this amounted to?                                                                                                                            | <p>_____ Leones Don't know <input type="checkbox"/></p>                                                                                                                                                                                                                                                                                                                                                                                                                |
| E23 | How many <b>family members / attendants / persons stayed in hospital</b> during your hospital stay (excluding visitors)?                                                                                                                                                                      | <p>_____ people</p>                                                                                                                                                                                                                                                                                                                                                                                                                                                    |
| E24 | <b>Where did they stay</b> and <b>how much</b> did your household pay towards this?                                                                                                                                                                                                           | <p>In hospital <input type="checkbox"/></p> <p>Outside accommodation <input type="checkbox"/></p> <p>Other <input type="checkbox"/> specify _____</p> <p>Total cost _____ Leones Don't know <input type="checkbox"/></p>                                                                                                                                                                                                                                               |
| E25 | During your hospital stay <b>where did you get food from?</b><br>Tick <u>all</u> that are applicable                                                                                                                                                                                          | <p>Provided by the hospital <input type="checkbox"/></p> <p>Bought by the patient / household <input type="checkbox"/></p> <p>Brought for the patient by someone else <input type="checkbox"/></p> <p>Other <input type="checkbox"/> specify _____</p>                                                                                                                                                                                                                 |
| E26 | How much did you / your household <b>spend on food</b> during your hospital stay? If they can't give a break down then ask for a total.                                                                                                                                                       | <p>On patient _____ Leones Don't know <input type="checkbox"/></p> <p>For attendants _____ Leones Don't know <input type="checkbox"/></p> <p>Total _____ Leones Don't know <input type="checkbox"/></p>                                                                                                                                                                                                                                                                |
| E27 | Did your household spend any money on transport for all the <b>"running" (transport to get food, hospital supplies, investigations and medications externally, excluding transport for visitors)?</b> If yes ask how much and state what this was for?<br>Tick <u>all</u> that are applicable | <p>_____ Leones Don't know <input type="checkbox"/></p> <p><b>What was this for?</b></p> <p>Food for the patients / attendants <input type="checkbox"/></p> <p>Going for tests / investigations outside <input type="checkbox"/></p> <p>Getting medicines / medical supplies <input type="checkbox"/></p> <p>Other <input type="checkbox"/> specify _____</p>                                                                                                          |
| E28 | Did your household have to pay any money at the time of <b>discharge?</b> If yes, ask how much was paid?                                                                                                                                                                                      | <p>_____ Leones. Don't know <input type="checkbox"/></p> <p>Who or where was that paid to;</p> <ul style="list-style-type: none"> <li>- Bank in Connaught <input type="checkbox"/></li> </ul> <p>_____ Leones</p> <ul style="list-style-type: none"> <li>- Directly to healthcare workers <input type="checkbox"/></li> </ul> <p>_____ Leones</p> <ul style="list-style-type: none"> <li>- Other <input type="checkbox"/> specify _____</li> </ul> <p>_____ Leones</p> |
| E29 | Did your household have <b>any other illness related / hospital costs (e.g at SOP / other departments visited)?</b> If yes, specify what these costs where for.                                                                                                                               | <p>Yes <input type="checkbox"/> (specify and go to E30) No <input type="checkbox"/> (go to F1)</p> <p><b>Specify</b> _____</p>                                                                                                                                                                                                                                                                                                                                         |
| E30 | How much did these <b>other costs</b> amount to?                                                                                                                                                                                                                                              | <p>_____ Leones. Don't know <input type="checkbox"/></p> <p>Who or where was that paid to;</p> <ul style="list-style-type: none"> <li>- Bank in Connaught <input type="checkbox"/></li> </ul> <p>_____ Leones</p> <ul style="list-style-type: none"> <li>- Directly to healthcare workers <input type="checkbox"/></li> </ul> <p>_____ Leones</p> <ul style="list-style-type: none"> <li>- Other <input type="checkbox"/> specify _____</li> </ul> <p>_____ Leones</p> |

**Section 5: Indirect non-medical expenditure and how costs are met**

**"I will now ask you some questions about the broader implications of the costs and how you have met these costs?"**

| Code | Question                                                                     | Response                                                                                                   |
|------|------------------------------------------------------------------------------|------------------------------------------------------------------------------------------------------------|
| F1   | Do you have <b>health insurance/medical care</b> to cover any medical costs? | Yes <input type="checkbox"/> No <input type="checkbox"/> (go to F5)<br>Don't know <input type="checkbox"/> |
| F2   | What <b>type of health insurance</b> do you have?                            | <input type="checkbox"/> Private insurance<br><input type="checkbox"/> Work-related insurance              |



|    |                                                                                                                                                                                                                                 |                                                                                                                                                                                                                                                                                                                                                         |
|----|---------------------------------------------------------------------------------------------------------------------------------------------------------------------------------------------------------------------------------|---------------------------------------------------------------------------------------------------------------------------------------------------------------------------------------------------------------------------------------------------------------------------------------------------------------------------------------------------------|
|    |                                                                                                                                                                                                                                 | <input type="checkbox"/> Other (specify) _____                                                                                                                                                                                                                                                                                                          |
| F3 | What is your <b>monthly contribution towards your insurance</b> (if applicable)?                                                                                                                                                | _____ Leones Don't know <input type="checkbox"/>                                                                                                                                                                                                                                                                                                        |
| F4 | Does <b>this insurance cover all (total) medical costs</b> ?                                                                                                                                                                    | Yes <input type="checkbox"/> No <input type="checkbox"/> If no, how much was paid in addition _____ Leones Don't know <input type="checkbox"/>                                                                                                                                                                                                          |
| F5 | <b>How did your household pay</b> for all the above costs? Tick <u>all</u> that are applicable                                                                                                                                  |                                                                                                                                                                                                                                                                                                                                                         |
|    | <b>Use savings?</b> Yes <input type="checkbox"/> No <input type="checkbox"/> Don't know <input type="checkbox"/>                                                                                                                | How much? _____ Leones Don't know <input type="checkbox"/>                                                                                                                                                                                                                                                                                              |
|    | <b>Borrow money?</b> Yes <input type="checkbox"/> No <input type="checkbox"/> Don't know <input type="checkbox"/>                                                                                                               | How much? _____ Leones<br>Does this need to be paid back? Yes <input type="checkbox"/> No <input type="checkbox"/> Don't know <input type="checkbox"/>                                                                                                                                                                                                  |
|    | <b>Arrange family contributions?</b> Yes <input type="checkbox"/> No <input type="checkbox"/> Don't know <input type="checkbox"/>                                                                                               | How much? _____ Leones<br>Does this need to be paid back? Yes <input type="checkbox"/> No <input type="checkbox"/> Don't know <input type="checkbox"/>                                                                                                                                                                                                  |
|    | <b>Charity money from family/friends outside the country/church/social clubs?</b> Yes <input type="checkbox"/> No <input type="checkbox"/> Don't know <input type="checkbox"/>                                                  | How much? _____ Leones<br>Does this need to be paid back? Yes <input type="checkbox"/> No <input type="checkbox"/> Don't know <input type="checkbox"/>                                                                                                                                                                                                  |
|    | <b>Pledge / pawn any possessions</b> (including livestock, assets including electrical goods, generator, watches, jewellery etc.)? Yes <input type="checkbox"/> No <input type="checkbox"/> Don't know <input type="checkbox"/> | How much money did this raise? _____ Leones<br>Don't know <input type="checkbox"/>                                                                                                                                                                                                                                                                      |
|    | <b>Sell any possessions or land?</b> Yes <input type="checkbox"/> No <input type="checkbox"/> Don't know <input type="checkbox"/>                                                                                               | How much money did this raise? _____ Leones<br>Don't know <input type="checkbox"/>                                                                                                                                                                                                                                                                      |
|    | <b>Any other way of meeting the hospital costs?</b> Yes <input type="checkbox"/> No <input type="checkbox"/> Don't know <input type="checkbox"/>                                                                                | Specify how _____<br>How much money did this raise? _____ Leones<br>Don't know <input type="checkbox"/>                                                                                                                                                                                                                                                 |
| F6 | Did your household have to <b>stop sending any children to school, or pay reduced school fees</b> in order to pay for this hospitalisation?                                                                                     | Yes <input type="checkbox"/> No <input type="checkbox"/> Don't know <input type="checkbox"/>                                                                                                                                                                                                                                                            |
| F7 | Did your household <b>lose any wages</b> due to this hospital stay? If yes, ask how much was lost?                                                                                                                              | Yes <input type="checkbox"/> No <input type="checkbox"/> Don't know <input type="checkbox"/><br>How much was lost _____ Leones<br>Don't know <input type="checkbox"/>                                                                                                                                                                                   |
| F8 | Did you or anyone in your household <b>lose their job or change their role at work or home</b> ?                                                                                                                                | Yes <input type="checkbox"/> No <input type="checkbox"/> Don't know <input type="checkbox"/><br>If yes please specify<br>Lost job <input type="checkbox"/><br>Took up employment / 2 <sup>nd</sup> job <input type="checkbox"/><br>Change of duties in household to meet costs <input type="checkbox"/><br>Other <input type="checkbox"/> specify _____ |

Any other comments?

---



---



---

## Appendix table 2: Household expenditure showing imputed and non-imputed data sets.

Comparison of non-imputed and imputed data on household expenditure using Multiple Imputation Chained Equations to compute missing data-points using predictive mean matching.

| Household expense                                                                                                                                       | Non-imputed data mean (SD) (Le and \$US)    | Imputed data pooled mean (Le and \$ US) |
|---------------------------------------------------------------------------------------------------------------------------------------------------------|---------------------------------------------|-----------------------------------------|
| <b>Individual Consumption Expenditure by Households Including all variables collected</b>                                                               | Le 39,665,597 (53,679,740) \$ 4,425 (5,989) | Le 47,944,384 \$5,349                   |
| <b>Individual Consumption Expenditure by Households Excluding variables with &gt; 20% missing data i.e. clothing, mobile phone credit and transport</b> | Le 28,134,505 (31,539,987) \$ 3,139 (3,519) | Le 31,988,507 \$ 3,569                  |
| Food and non-alcoholic beverages                                                                                                                        | Le 18,616,404                               | Le 20,867,118                           |

|                                                                    |                                             |                        |
|--------------------------------------------------------------------|---------------------------------------------|------------------------|
|                                                                    | (22,364,391)<br>\$ 2,077 (2,495)            | \$ 2,328               |
| Alcoholic Beverages, Tobacco and Narcotics                         | Le 252,991<br>(1,047,612)<br>\$ 28 (117)    | Le 314,095<br>\$ 35    |
| Rental                                                             | Le 884,123<br>(4,670,009)<br>\$ 99 (521)    | Le 876,940<br>\$ 98    |
| Household maintenance                                              | Le 108,092<br>(298,466)<br>\$ 12 (33)       | Le 130,857<br>\$ 15    |
| Electricity, gas and other fuels                                   | Le 720,748<br>(1,068,694)<br>\$ 80 (119)    | Le 747,701<br>\$ 83    |
| Furnishings, household equipment and routine household maintenance | Le 632,577<br>(1,065,761)<br>\$ 71 (119)    | Le 699,188<br>\$ 78    |
| Healthcare (traditional and western medicine)                      | Le 561,770<br>(1,490,207)<br>\$ 63 (166)    | Le 740,205<br>\$ 83    |
| Recreation and cultural services                                   | Le 821,684<br>(1,894,677)<br>\$ 92 (211)    | Le 1,121,965<br>\$ 125 |
| Education                                                          | Le 1,338,183<br>(2,295,578)<br>\$ 149 (256) | Le 1,614,982<br>\$ 180 |
| Personal care / toiletries                                         | Le 609,012<br>(629,656)<br>\$ 68 (70)       | Le 627,269<br>\$ 70    |
| Health insurance                                                   | Le 8,333<br>(138,661)<br>\$ 1 (15)          | Le 13,370<br>\$ 1      |
| Remittance                                                         | Le 974,408<br>(1,655,020)<br>\$ 109 (185)   | Le 1,015,363<br>\$ 113 |
| Donations                                                          | Le 185,233<br>(475,436)<br>\$ 21 (53)       | Le 203,246<br>\$ 23    |
| Livestock                                                          | Le 41,400<br>(213,804)<br>\$ 5 (24)         | Le 45,254<br>\$ 5      |
| Taxes                                                              | Le 59,500<br>(261,497)<br>\$ 7 (29)         | Le 73,723<br>\$ 8      |

**Appendix table 3: Household expenditure data.** Variables on household expenditure shown here, for broad comparison, with the Economic and Financial survey Sierra Leone 2014 data<sup>21</sup>. Categories were harmonised where possible, however given differences in questions asked between surveys, an exact match of categories was not possible to achieve. Costs from the 2014 Economic and Financial Survey were not adjusted for inflation which needs to be considered when reviewing this data.

| Household consumption expenditure (in Leones (Le) and USD (\$))      |                                                      |                           |
|----------------------------------------------------------------------|------------------------------------------------------|---------------------------|
| Household Expense                                                    | Sierra Leone Economic and Financial Survey data 2014 | Study data                |
| Individual Consumption Expenditure by Households (Total Expenditure) | Le 15,414,816<br>\$ 1,739                            | Le 31,988,507<br>\$ 3,569 |

|                                                                           |                                      |                                         |
|---------------------------------------------------------------------------|--------------------------------------|-----------------------------------------|
| <b>Food and non-alcoholic beverages</b>                                   | <b>Le 6,838,365</b><br><b>\$ 771</b> | <b>Le 20,867,118</b><br><b>\$ 2,328</b> |
| Food                                                                      | Le 6,644,019<br>\$ 74                | Le 17,925,090<br>\$ 2,000               |
| Non-alcoholic beverages                                                   | Le 194,346<br>\$ 22                  | Le 2,942,028<br>\$ 328                  |
| <b>Alcoholic Beverages, Tobacco and Narcotics</b>                         | <b>Le 450,612</b><br><b>\$ 51</b>    | <b>Le 314,095</b><br><b>\$ 35</b>       |
| <b>Housing, water, electricity, gas and other fuels</b>                   | <b>Le 1,058,449</b><br><b>\$119</b>  | <b>Le 875,672</b><br><b>\$ 98</b>       |
| Rental                                                                    | Le 253,948<br>\$ 29                  | Le 876,940<br>\$ 98                     |
| Maintenance and repair of the dwelling                                    | Le 32,650<br>\$ 4                    | Le 876,940<br>\$ 98                     |
| Electricity, gas and other fuels                                          | Le 595,832<br>\$ 67                  | Le 747,701<br>\$ 83                     |
| <b>Furnishings, household equipment and routine household maintenance</b> | <b>Le 413,364</b><br><b>\$ 47</b>    | <b>Le 699,188</b><br><b>\$ 78</b>       |
| Furnishings                                                               | Le 88,058<br>\$ 10                   | Le 196,217<br>\$ 22                     |
| Household appliances                                                      | Le 41,821<br>\$ 5                    | Le 314,772<br>\$ 35                     |
| Tools and equipment for house and garden                                  | Le 45,403<br>\$ 5                    | Le 57,344<br>\$ 6                       |
| Goods and services for routine household maintenance                      | Le 105,438<br>\$ 12                  | Le 130,857<br>\$ 15                     |
| Purchase of vehicles                                                      | Le 108,710<br>\$ 12                  | Le 160,759<br>\$ 18                     |
| Educations                                                                | Le 794,478<br>\$ 90                  | Le 1,614,982<br>\$ 180                  |
| Insurance (HI)                                                            | Le 38,890<br>\$ 4                    | Le 13,370<br>\$ 1                       |

Appendix table 4: Imputed and non-imputed data for out-of-pocket costs for comparison.

| Costs                                                      | Imputed<br>Mean cost<br>(\$US (% of subtotal)) | Non-imputed<br>Mean cost (\$US) (SD) |
|------------------------------------------------------------|------------------------------------------------|--------------------------------------|
| <b>Prehospital costs</b>                                   |                                                |                                      |
| <b>Direct pre-hospital medical OOP costs (total)</b>       | <b>21 (88% of 24)</b>                          | <b>14 (65)</b>                       |
| - Consultation                                             | 2 (10% of 21)                                  | 1 (6)                                |
| - Medications                                              | 12 (57% of 21)                                 | 9 (46)                               |
| - Medical supplies                                         | 2 (10% of 21)                                  | 2 (8)                                |
| - Investigations                                           | 4 (19% of 21)                                  | 4 (25)                               |
| - Other miscellaneous                                      | 2 (10% of 21)                                  | 1 (10)                               |
| <b>Direct (pre-hospital) non-medical OOP costs (total)</b> | <b>3 (13% of 24)</b>                           | <b>3 (9)</b>                         |
| - Transport                                                | 3 (100% of 3)                                  | 3 (9)                                |
| <b>Total pre-hospital costs</b>                            | <b>24 (10% of 243)</b>                         | <b>25 (75)</b>                       |
| <b>In hospital costs</b>                                   |                                                |                                      |
| <b>Direct medical OOP costs (total)</b>                    | <b>138 (63% of 219)</b>                        | <b>109 (121)</b>                     |
| - Administrative                                           | 20 (14% of 138)                                | 16 (24)                              |
| - Medications                                              | 26 (19% of 138)                                | 25 (61)                              |
| - Medical supplies                                         | 14 (10% of 138)                                | 11 (33)                              |
| - Investigations                                           | 15 (11% of 138)                                | 14 (23)                              |
| - Blood transfusion                                        | 9 (7% of 138)                                  | 9 (22)                               |
| - Total operation costs                                    | 49 (36% of 138)                                | 51 (75)                              |
| - Unofficial costs                                         | 6 (4% of 138)                                  | 5 (9)                                |
| - Other / miscellaneous                                    | 1 (1% of 138)                                  | 1 (8)                                |
| <b>Direct non-medical costs (total)</b>                    | <b>34 (16% of 219)</b>                         | <b>34 (34)</b>                       |
| - Transport to hospital                                    | 7 (21% of 34)                                  | 7 (17)                               |
| - Food                                                     | 20 (59% of 34)                                 | 21 (20)                              |
| - Accommodation                                            | 0 (0% of 34)                                   | 0 (0)                                |
| - Other*                                                   | 7 (21% of 34)                                  | 6 (10)                               |
| <b>Indirect costs</b>                                      |                                                |                                      |
| - Lost wages                                               | 46 (100% of 46)                                | 35 (116)                             |
| <b>TOTAL OOP COSTS</b>                                     | <b>243</b>                                     | <b>176 (165)</b>                     |

\*other relates to travel and other associated costs incurred as a result for needed investigations from and or medication / supplies from an external facility. SPSS calculates only the mean using imputed variables, hence no standard deviation is displayed.

**Appendix table 5: Route of payment for OOP costs; percentage of the total OOP costs by cost categories paid to bank / cashier, directly to staff or externally for different services accessed once tertiary level care was reached**

| Costs                                                       | % paid to Hospital bank / cashier | % paid directly to or via staff | % paid externally | % unknown    | Total       |
|-------------------------------------------------------------|-----------------------------------|---------------------------------|-------------------|--------------|-------------|
| <b>TOTAL in-hospital costs</b>                              | <b>32.64%</b>                     | <b>48.16%</b>                   | <b>16.50%</b>     | <b>2.70%</b> | <b>100%</b> |
| <b>Administration</b>                                       | <b>52.03%</b>                     | <b>42.53%</b>                   | -                 | 5.44%        | 100%        |
| - Registration fees                                         | 90.98%                            | 8.71%                           | -                 | 0.30%        | 100%        |
| - Admission fees                                            | 66.78%                            | 32.39%                          | -                 | 0.83%        | 100%        |
| - Triage fees                                               | 8.05%                             | 91.95%                          | -                 | 0.00%        | 100%        |
| - Bed fees                                                  | 19.47%                            | 46.13%                          | -                 | 34.40%       | 100%        |
| - Discharge fees                                            | 41.19%                            | 57.28%                          | -                 | 1.53%        | 100%        |
| <b>Investigations</b>                                       | <b>19.39%</b>                     | <b>44.29%</b>                   | <b>33.73%</b>     | <b>2.59%</b> | <b>100%</b> |
| - Laboratory                                                | 25.68%                            | 40.29%                          | 30.13%            | 3.90%        | 100%        |
| - Imaging                                                   | 14.43%                            | 47.44%                          | 36.57%            | 1.56%        | 100%        |
| <b>Total operation costs</b>                                | <b>55.40%</b>                     | <b>32.89%</b>                   | <b>9.35%</b>      | <b>2.35%</b> | <b>100%</b> |
| - Operation                                                 | 80.10%                            | 18.91%                          | -                 | 1.00%        | 100%        |
| - Medical supplies for the operation                        | 13.42%                            | 56.59%                          | 25.31%            | 4.68%        | 100%        |
| - Other / miscellaneous                                     | 69.77%                            | 30.23%                          | -                 | 0.00%        | 100%        |
| <b>Blood transfusion</b>                                    | <b>16.24%</b>                     | <b>67.68%</b>                   | <b>13.85%</b>     | <b>2.23%</b> | <b>100%</b> |
| <b>Total medications and medical supplies for ward care</b> | <b>4.82%</b>                      | <b>61.00%</b>                   | <b>31.73%</b>     | <b>2.45%</b> | <b>100%</b> |
| - Medications                                               | 2.19%                             | 62.86%                          | 31.91%            | 3.03%        | 100%        |
| - Medical supplies                                          | 10.81%                            | 56.74%                          | 31.31%            | 1.14%        | 100%        |
| <b>Informal payment</b>                                     | <b>2.44%</b>                      | <b>97.56%</b>                   | -                 | <b>0.00%</b> | <b>100%</b> |
| - Doctors' fees                                             | 8.72%                             | 91.28%                          | -                 | 0.00%        | 100%        |
| - Nursing care                                              | 0%                                | 100%                            | -                 | 0.00%        | 100%        |
| - Porters                                                   | 0%                                | 100%                            | -                 | 0.00%        | 100%        |
| - Tips                                                      | 0%                                | 100%                            | -                 | 0.00%        | 100%        |
| <b>Other / miscellaneous costs</b>                          | <b>0%</b>                         | <b>98.37%</b>                   | <b>0</b>          | <b>1.63%</b> | <b>100%</b> |

**Appendix table 6: Linear regression analysis showing odds of increasing in-hospital costs of care for each variable using a generalized linear model with imputed variables using a Tweedie 1.9 function.**

| Variable              |                            | Odds Ratio | 95% CI       | p-value |
|-----------------------|----------------------------|------------|--------------|---------|
| Sex                   | Female                     | ref        |              |         |
|                       | Male                       | 1.05       | (0.86-1.29)  | 0.63    |
| Age                   | Age                        | 1.02       | (1.01-1.02)  | 0.00    |
| Length of stay        | Length of stay             | 1.02       | (1.02 -1.03) | 0.00    |
| Type of admission     | Elective admission         | ref        |              |         |
|                       | Emergency admission        | 0.96       | (0.75-1.24)  | 0.77    |
| Category of operation | Non-operative              | ref        |              |         |
|                       | Burns                      | 1.33       | (0.25-7.00)  | 0.74    |
|                       | ENT                        | 0.64       | (0.36-1.166) | 0.14    |
|                       | General surgery            | 1.67       | (1.29-2.17)  | 0.00    |
|                       | General paediatric surgery | 0.84       | (0.57-1.24)  | 0.38    |
|                       | Trauma and orthopaedic     | 1.30       | (0.98- 1.74) | 0.07    |
|                       | Urology                    | 2.08       | (1.22-3.53)  | 0.01    |
| Area of residence     | Rural                      | ref        |              |         |
|                       | Urban                      | 0.98       | (0.76-1.25)  | 0.85    |

1  
2  
3  
4  
5  
6  
7  
8  
9  
10  
11  
12  
13  
14  
15  
16  
17  
18  
19  
20  
21  
22  
23  
24  
25  
26  
27  
28  
29  
30  
31  
32  
33  
34  
35  
36  
37  
38  
39  
40  
41  
42  
43  
44  
45  
46  
47  
48  
49  
50  
51  
52  
53  
54  
55  
56  
57  
58  
59  
60STROBE Statement—Checklist of items that should be included in reports of *cross-sectional studies*

|                              | Item No | Recommendation                                                                                                                                                                                    | Page number               |
|------------------------------|---------|---------------------------------------------------------------------------------------------------------------------------------------------------------------------------------------------------|---------------------------|
| <b>Title and abstract</b>    | 1       | (a) Indicate the study's design with a commonly used term in the title or the abstract                                                                                                            | 1-3                       |
|                              |         | (b) Provide in the abstract an informative and balanced summary of what was done and what was found                                                                                               | 1-3                       |
| <b>Introduction</b>          |         |                                                                                                                                                                                                   | <b>4</b>                  |
| Background/rationale         | 2       | Explain the scientific background and rationale for the investigation being reported                                                                                                              | 4                         |
| Objectives                   | 3       | State specific objectives, including any prespecified hypotheses                                                                                                                                  | 4                         |
| <b>Methods</b>               |         |                                                                                                                                                                                                   | <b>5-7</b>                |
| Study design                 | 4       | Present key elements of study design early in the paper                                                                                                                                           | 5                         |
| Setting                      | 5       | Describe the setting, locations, and relevant dates, including periods of recruitment, exposure, follow-up, and data collection                                                                   | 5                         |
| Participants                 | 6       | (a) Give the eligibility criteria, and the sources and methods of selection of participants                                                                                                       | 5                         |
| Variables                    | 7       | Clearly define all outcomes, exposures, predictors, potential confounders, and effect modifiers. Give diagnostic criteria, if applicable                                                          | 5-7                       |
| Data sources/<br>measurement | 8*      | For each variable of interest, give sources of data and details of methods of assessment (measurement). Describe comparability of assessment methods if there is more than one group              | 5-7                       |
| Bias                         | 9       | Describe any efforts to address potential sources of bias                                                                                                                                         | 10-11                     |
| Study size                   | 10      | Explain how the study size was arrived at                                                                                                                                                         | 7                         |
| Quantitative variables       | 11      | Explain how quantitative variables were handled in the analyses. If applicable, describe which groupings were chosen and why                                                                      | 7                         |
| Statistical methods          | 12      | (a) Describe all statistical methods, including those used to control for confounding                                                                                                             | 7                         |
|                              |         | (b) Describe any methods used to examine subgroups and interactions                                                                                                                               | 7                         |
|                              |         | (c) Explain how missing data were addressed                                                                                                                                                       | 7                         |
|                              |         | (d) If applicable, describe analytical methods taking account of sampling strategy                                                                                                                | n/a                       |
|                              |         | (e) Describe any sensitivity analyses                                                                                                                                                             | 7                         |
| <b>Results</b>               |         |                                                                                                                                                                                                   | <b>8-9</b>                |
| Participants                 | 13*     | (a) Report numbers of individuals at each stage of study—eg numbers potentially eligible, examined for eligibility, confirmed eligible, included in the study, completing follow-up, and analysed | 8-9<br>Figure 1           |
|                              |         | (b) Give reasons for non-participation at each stage                                                                                                                                              | Figure 1                  |
|                              |         | (c) Consider use of a flow diagram                                                                                                                                                                | Figure 1                  |
| Descriptive data             | 14*     | (a) Give characteristics of study participants (eg demographic, clinical, social) and information on exposures and potential confounders                                                          | 8<br>Table 1              |
|                              |         | (b) Indicate number of participants with missing data for each variable of interest                                                                                                               | Table 1                   |
| Outcome data                 | 15*     | Report numbers of outcome events or summary measures                                                                                                                                              | 8-9<br>Table 1<br>Table 2 |

Table 3

Table 4

|                          |    |                                                                                                                                                                                                              |                     |
|--------------------------|----|--------------------------------------------------------------------------------------------------------------------------------------------------------------------------------------------------------------|---------------------|
| Main results             | 16 | (a) Give unadjusted estimates and, if applicable, confounder-adjusted estimates and their precision (eg, 95% confidence interval). Make clear which confounders were adjusted for and why they were included | n/a                 |
|                          |    | (b) Report category boundaries when continuous variables were categorized                                                                                                                                    | 8-9<br>Tables       |
|                          |    | (c) If relevant, consider translating estimates of relative risk into absolute risk for a meaningful time period                                                                                             | n/a                 |
| Other analyses           | 17 | Report other analyses done—eg analyses of subgroups and interactions, and sensitivity analyses                                                                                                               | Appendix<br>1, 2, 3 |
| <b>Discussion</b>        |    |                                                                                                                                                                                                              | <b>9 - 10</b>       |
| Key results              | 18 | Summarise key results with reference to study objectives                                                                                                                                                     | 9-10                |
| Limitations              | 19 | Discuss limitations of the study, taking into account sources of potential bias or imprecision. Discuss both direction and magnitude of any potential bias                                                   | 10-11               |
| Interpretation           | 20 | Give a cautious overall interpretation of results considering objectives, limitations, multiplicity of analyses, results from similar studies, and other relevant evidence                                   | 9-10                |
| Generalisability         | 21 | Discuss the generalisability (external validity) of the study results                                                                                                                                        | 10                  |
| <b>Other information</b> |    |                                                                                                                                                                                                              |                     |
| Funding                  | 22 | Give the source of funding and the role of the funders for the present study and, if applicable, for the original study on which the present article is based                                                | 1                   |

\*Give information separately for exposed and unexposed groups.

**Note:** An Explanation and Elaboration article discusses each checklist item and gives methodological background and published examples of transparent reporting. The STROBE checklist is best used in conjunction with this article (freely available on the Web sites of PLoS Medicine at <http://www.plosmedicine.org/>, Annals of Internal Medicine at <http://www.annals.org/>, and Epidemiology at <http://www.epidem.com/>). Information on the STROBE Initiative is available at [www.strobe-statement.org](http://www.strobe-statement.org).
